# Supplementary material for: UiO-66 metal organic frameworks with high contents of flexible adipic acid co-linkers
Source: Royal Society of Chemistry journal article supplement (doi:10.1039/d2cc03285f), 2022-01-01
Supplement: d2cc03285f1.pdf [file d2cc03285f1.pdf]

Electronic Supplementary Information

**UiO-66 Metal Organic Frameworks with High Contents of Flexible Adipic Acid co-Linker**

Tristan T. Y. Tan, Xin Li, Ken-ichi Otake, Ying Chuan Tan, Xian Jun Loh, Susumu Kitagawa,\* Jason Y. C. Lim\*

Corresponding author email: kitagawa@icems.kyoto-u.ac.jp; jason\_lim@imre.a-star.edu.sg

|                                         |     |
|-----------------------------------------|-----|
| 1. Experimental .....                   | S2  |
| 2. Scanning electron microscopy .....   | S5  |
| 3. Powder X-ray Diffraction .....       | S8  |
| 4. NMR of Digested UiO-66 samples ..... | S12 |
| 5. Solid state NMR.....                 | S23 |
| 6. Thermogravimetric Analysis .....     | S30 |
| 7. Gas absorption isotherms .....       | S36 |
| 8. Computational Modeling .....         | S40 |
| 9. Infrared spectra .....               | S47 |
| 10. References.....                     | S51 |

## 1. Experimental

### 1.1 Materials and methods

All materials were purchased from commercial vendors and used as received.  $ZrCl_4$ , adipic acid and terephthalic acid and  $K_3PO_4$  were purchased from Sigma Aldrich.  $ZrOCl_2 \cdot 8H_2O$  was purchased from Merck. 3-Methyladipic acid, acetic acid and formic acid were purchased from TCI. Concentrated hydrochloric acid was purchased from Honeywell. Anhydrous *N,N*-Dimethylformamide (DMF) was purchased from Acros.

Powder XRD data were collected using a Bruker D8-Advance X-ray powder diffractometer with  $Cu\ K\alpha$  radiation, at a resolution of  $0.02^\circ$  and a scan rate of 0.1-0.5 s/point.

Thermogravimetric analyses (TGA) data was collected using a TA Instrument Q500. Samples were heated at a rate of  $5\ ^\circ C/min$  to  $600\ ^\circ C$  under air.

Liquid state  $^1H$  NMR on digested MOF samples were done using a JEOL 500 MHz spectrometer. Samples were digested in a saturated solution of  $K_3PO_4$  dissolved in  $D_2O$ . The relaxation delay was increased to 30 seconds to ensure accurate integration.

Solid state NMR was done using a JEOL JNM-ECZ600R/M3 spectrometer with a MAS spin rate of 20 kHz.

Sorption measurements were performed using a BELSORP-max Absorption Measurement Instrument equipped with cryogenic temperature controller.

Scanning electron Microscopy (SEM) analysis was performed with a JEOL JSM 5600 scanning electron microscope (tungsten source), equipped with an Oxford Link ISIS with an accelerating voltage of 10 to 15 kV. Prior to SEM analysis, samples were sputtered with gold using a JEOL JFC-1200 Fine Coater.

Infrared spectroscopy was performed on Perkin Elmer Spectrum 2000.

### 1.2 Synthesis of mixed adipate-terephthalate UiO-66

A 50 ml screw cap glass bottle was charged with terephthalic acid, adipic acid (see Table S1 for amounts) and DMF (20 mL). The mixture was agitated by ultrasonication until the terephthalic acid and adipic acid were fully dissolved, then concentrated hydrochloric acid (35 wt%, 100  $\mu L$ ) was added, followed by  $ZrCl_4$  (233 mg, 1 mmol). The mixture was again agitated by ultrasonication until homogenous. The mixture was placed in a preheated oven at  $130\ ^\circ C$  for 24 hours. The white powder formed was collected by suction filtration, rinsed with DMF (about 5 mL) and then with ethanol (about 20 ml). The collected solids were then resuspended in water (20 mL) and heated to  $80\ ^\circ C$  for 2 hours to replace the DMF within the pores with water. The solids were then collected again by filtration, rinsed with water, and dried in an oven at  $60\ ^\circ C$  for 1 hour. Material composition in Table S1 was determined by digesting about 10 mg of sample in a solution of about 10 mg of  $K_3PO_4$  in  $D_2O$ .

**Table S1.** Linker amounts employed in the synthesis of mixed linker UiO-66-*x*

| Experiment | Terephthalic acid used |      | Adipic acid used |      | Mole percentage of adipate w.r.t terephthalate in MOF<br>mol% |
|------------|------------------------|------|------------------|------|---------------------------------------------------------------|
|            | mg                     | mmol | mg               | mmol |                                                               |
| 1          | 166                    | 1    | 146              | 1    | 0                                                             |
| 2          | 149                    | 0.9  | 160              | 1.1  | 5                                                             |
| 3          | 132                    | 0.8  | 175              | 1.2  | 14                                                            |
| 4          | 116                    | 0.7  | 190              | 1.3  | 19                                                            |
| 5          | 100                    | 0.6  | 204              | 1.4  | 28                                                            |
| 6          | 83                     | 0.5  | 219              | 1.5  | 35                                                            |
| 7          | 66                     | 0.4  | 234              | 1.6  | 40                                                            |
| 8          | 50                     | 0.3  | 248              | 1.7  | 51                                                            |
| 9          | 33                     | 0.2  | 262              | 1.8  | 69                                                            |
| 10         | 17                     | 0.1  | 277              | 1.9  | 87                                                            |

### 1.3 Synthesis of mixed 3-methyladipate-terephthalate UiO-66

To investigate the generality of our method, we extended our study to another linear aliphatic acid, 3-methyladipate. Crystalline MOFs with Zr and 3-methyladipate have previously been reported,<sup>1</sup> and we chose this ligand to study if our method can be applied to other aliphatic acids, as well as to understand how the functional groups on the aliphatic ligand may affect the loading and properties on the obtained materials. The methods for the synthesis of the MOFs containing 3-methyladipate are the same as those for the MOFs containing adipate, as outlined below.

A 50 ml screw cap glass bottle was charged with terephthalic acid, 3-methyladipic acid (see Table S2 for amounts) and DMF (20 mL). The mixture was agitated by ultrasonication until the terephthalic acid and adipic acid were fully dissolved, then concentrated hydrochloric acid (35 wt%, 100  $\mu$ L) was added, followed by ZrCl<sub>4</sub> (233 mg, 1 mmol). The mixture was again agitated by ultrasonication until homogenous. The mixture was placed in a preheated oven at 130 °C for 24 hours. The white powder formed was collected by suction filtration, rinsed with DMF (about 5 mL) and then with ethanol (about 20 ml). The collected solids were then resuspended in water (20 mL) and heated to 80 °C for 2 hours to replace the DMF within the pores with water. The solids were then collected again by filtration, rinsed with water, and dried in an oven at 60 °C for 1 hour. Material composition in Table S2 was determined by digesting about 10 mg of sample in a solution of about 10 mg of K<sub>3</sub>PO<sub>4</sub> in D<sub>2</sub>O.

**Table S2.** Linker amounts employed in the synthesis of mixed linker UiO-66-3Me-*x*

| Experiment | Terephthalic acid used |      | 3-Methyladipic acid used |      | Mole percentage of 3-methyladipate w.r.t terephthalate in MOF<br>mol% |
|------------|------------------------|------|--------------------------|------|-----------------------------------------------------------------------|
|            | mg                     | mmol | mg                       | mmol |                                                                       |
| 1          | 166                    | 1    | 160                      | 1    | 11                                                                    |
| 2          | 132                    | 0.8  | 192                      | 1.2  | 16                                                                    |
| 3          | 100                    | 0.6  | 224                      | 1.4  | 31                                                                    |

#### 1.4 Thermolysis of adipic acid in UiO-66-*x*

Samples of mixed linker UiO-66-*x* (about 150 mg) were placed in a programmable furnace and the temperature was ramped from room temperature to 300 °C at 10 °C/min. The temperature was then held at 300 °C for 5 minutes, after which the samples were removed from the furnace and allowed to cool to room temperature under ambient conditions.

**Table S3.** Mole fraction of adipate (*x*) in UiO-66-*x*, measured by both liquid <sup>1</sup>H NMR (*x*<sub>NMR</sub>) of digested samples and TGA (*x*<sub>TGA</sub>), TGA mass loss of adipate and terephthalate as a weight % of ZrO<sub>2</sub> and corresponding ratio of terephthalate, adipate and defects in each sample as calculated by the method described by Shearer and coworkers.<sup>2</sup>

| Experiment | <i>x</i> <sub>NMR</sub> | <i>x</i> <sub>TGA</sub> | Weight loss of terephthalate (wt% ZrO <sub>2</sub> ) | Number of terephthalates per Zr <sub>6</sub> node | Weight loss of adipate (wt% ZrO <sub>2</sub> ) | Number of adipates per Zr <sub>6</sub> node | Number of defects per Zr <sub>6</sub> node |
|------------|-------------------------|-------------------------|------------------------------------------------------|---------------------------------------------------|------------------------------------------------|---------------------------------------------|--------------------------------------------|
| 1          | 0                       | 0                       | 110                                                  | 5.5                                               | 0                                              | 0.0                                         | 0.5                                        |
| 2          | 5                       | 6                       | 108                                                  | 5.4                                               | 6                                              | 0.3                                         | 0.3                                        |
| 3          | 14                      | 16                      | 96                                                   | 4.8                                               | 16                                             | 0.9                                         | 0.3                                        |
| 4          | 19                      | 20                      | 90                                                   | 4.5                                               | 20                                             | 1.1                                         | 0.4                                        |
| 5          | 28                      | 27                      | 75                                                   | 3.7                                               | 25                                             | 1.4                                         | 0.8                                        |
| 6          | 35                      | 31                      | 69                                                   | 3.4                                               | 27                                             | 1.5                                         | 1.0                                        |
| 7          | 40                      | 36                      | 60                                                   | 3.0                                               | 30                                             | 1.7                                         | 1.3                                        |
| 8          | 51                      | 46                      | 45                                                   | 2.2                                               | 34                                             | 1.9                                         | 1.8                                        |

**Table S4.** Mole fraction of 3-methyladipate (*x*) in UiO-66-3Me-*x*, measured by both liquid <sup>1</sup>H NMR (*x*<sub>NMR</sub>) of digested samples and TGA (*x*<sub>TGA</sub>), TGA mass loss of 3-methyladipate and terephthalate as a weight % of ZrO<sub>2</sub> and corresponding ratio of terephthalate, 3-methyladipate and defects in each sample as calculated as above.

| Experiment | <i>x</i> <sub>NMR</sub> | <i>x</i> <sub>TGA</sub> | Weight loss of terephthalate (wt% ZrO <sub>2</sub> ) | Number of terephthalates per Zr <sub>6</sub> node | Weight loss of 3-methyladipate (wt% ZrO <sub>2</sub> ) | Number of 3-methyladipate per Zr <sub>6</sub> node | Number of defects per Zr <sub>6</sub> node |
|------------|-------------------------|-------------------------|------------------------------------------------------|---------------------------------------------------|--------------------------------------------------------|----------------------------------------------------|--------------------------------------------|
| 1          | 11                      | 11                      | 100                                                  | 5.0                                               | 12                                                     | 0.6                                                | 0.4                                        |
| 2          | 16                      | 19                      | 89                                                   | 4.4                                               | 20                                                     | 1.0                                                | 0.5                                        |
| 3          | 31                      | 31                      | 68                                                   | 3.4                                               | 30                                                     | 1.6                                                | 1.0                                        |

## 2. Scanning electron microscopy

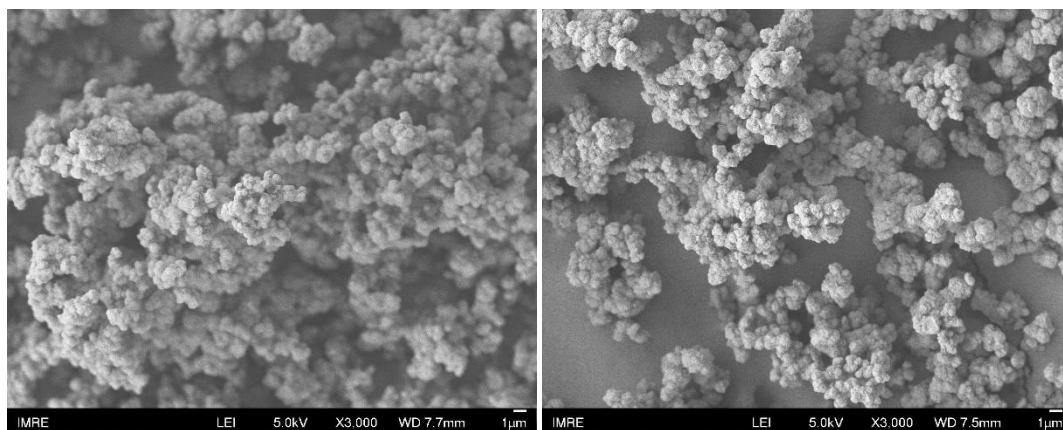

Figure S1: SEM images of **UiO-66-0** (left) and **UiO-66-0-th** (right)

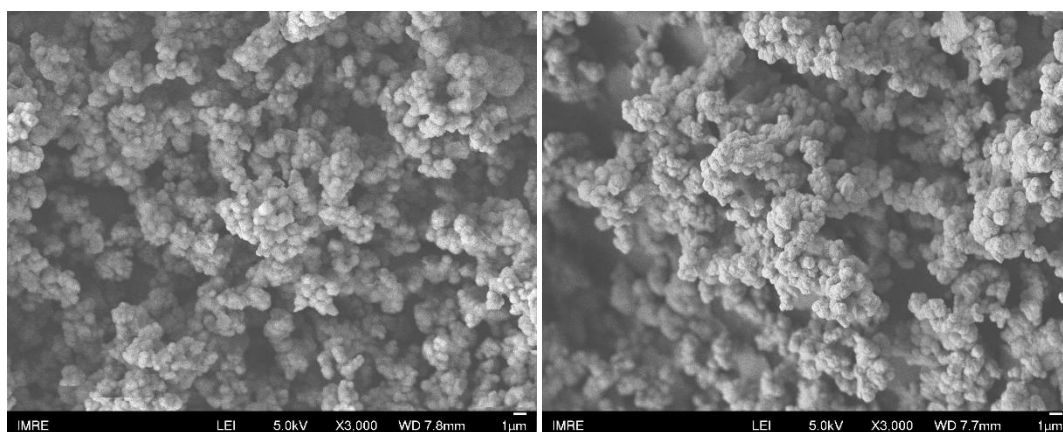

Figure S2: SEM images of **UiO-66-5** (left) and **UiO-66-5-th** (right)

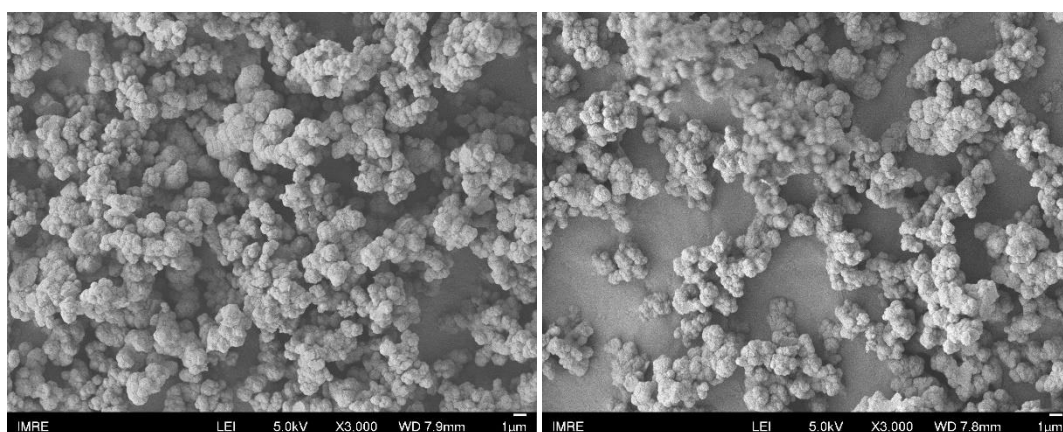

Figure S3: SEM images of **UiO-66-14** (left) and **UiO-66-14-th** (right)

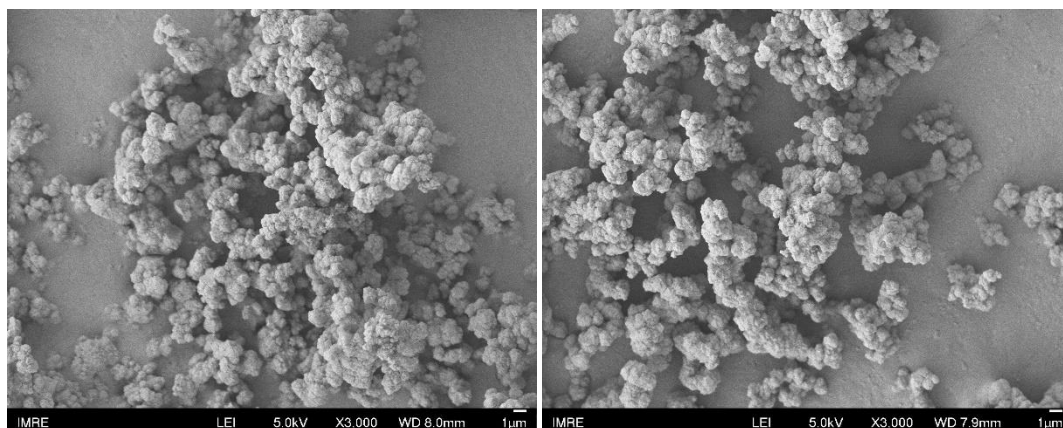

Figure S4: SEM images of **UiO-66-19** (left) and **UiO-66-19-th** (right)

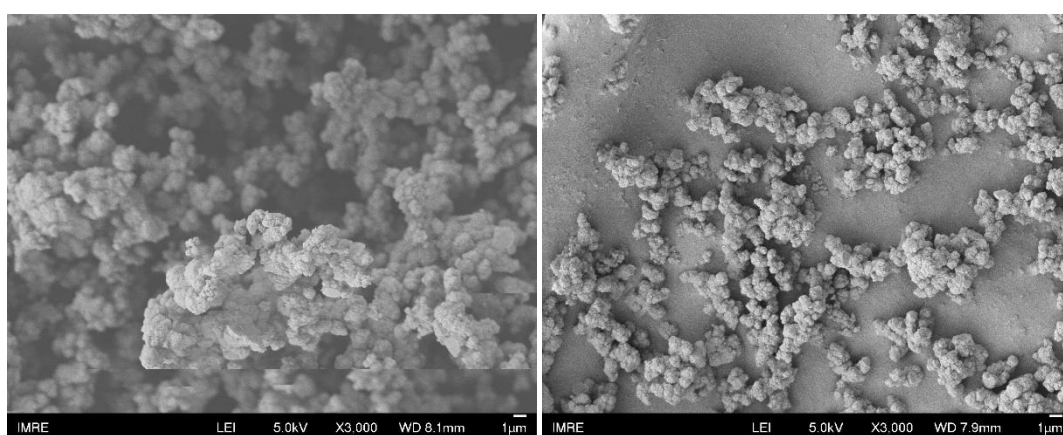

Figure S5: SEM images of **UiO-66-28** (left) and **UiO-66-28-th** (right)

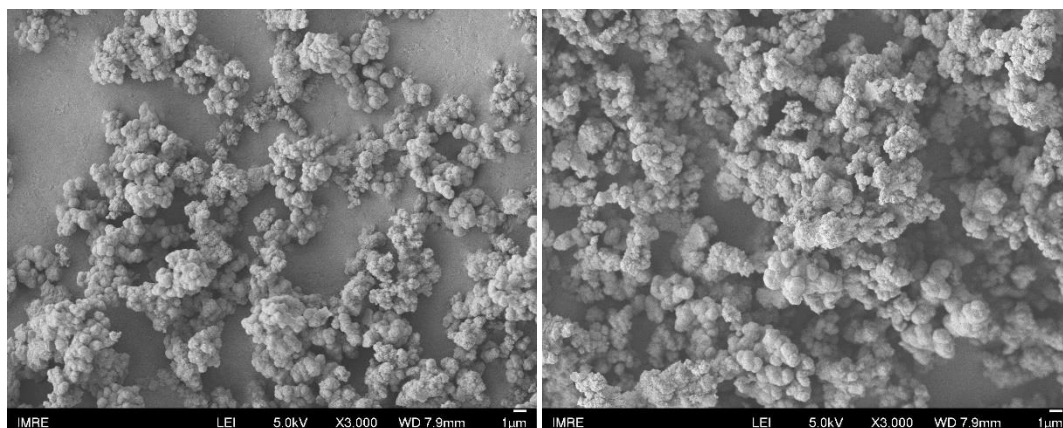

Figure S6: SEM images of **UiO-66-35** (left) and **UiO-66-35-th** (right)

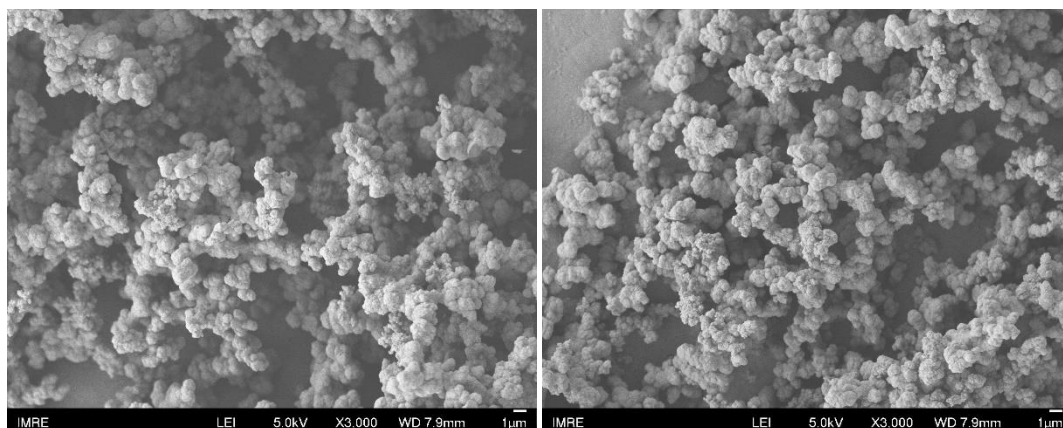

Figure S7: SEM images of **UiO-66-40** (left) and **UiO-66-40-th** (right)

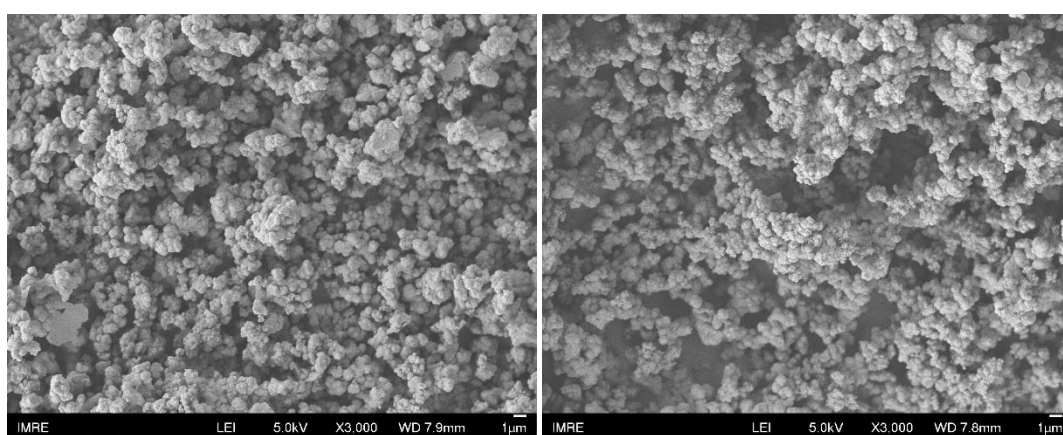

Figure S8: SEM images of **UiO-66-51** (left) and **UiO-66-51-th** (right)

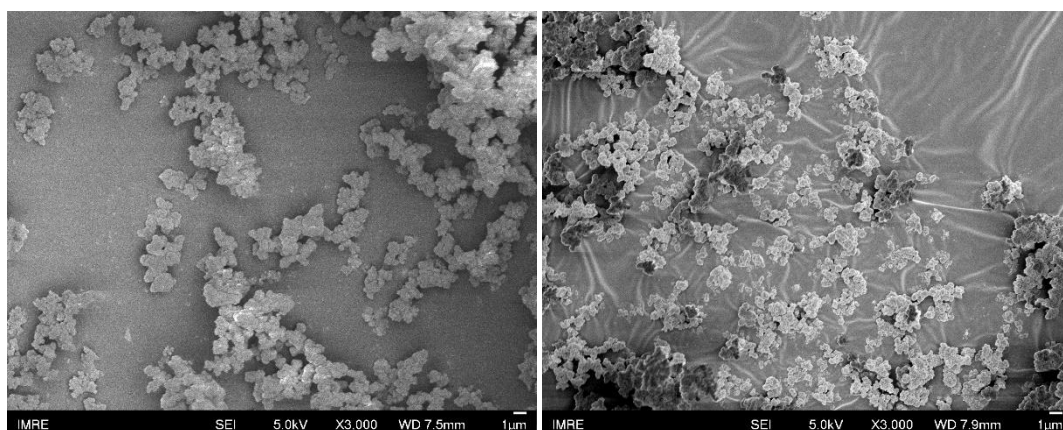

Figure S9: SEM images of **UiO-66-69** (left) and **UiO-66-87** (right)

### 3. Powder X-ray Diffraction

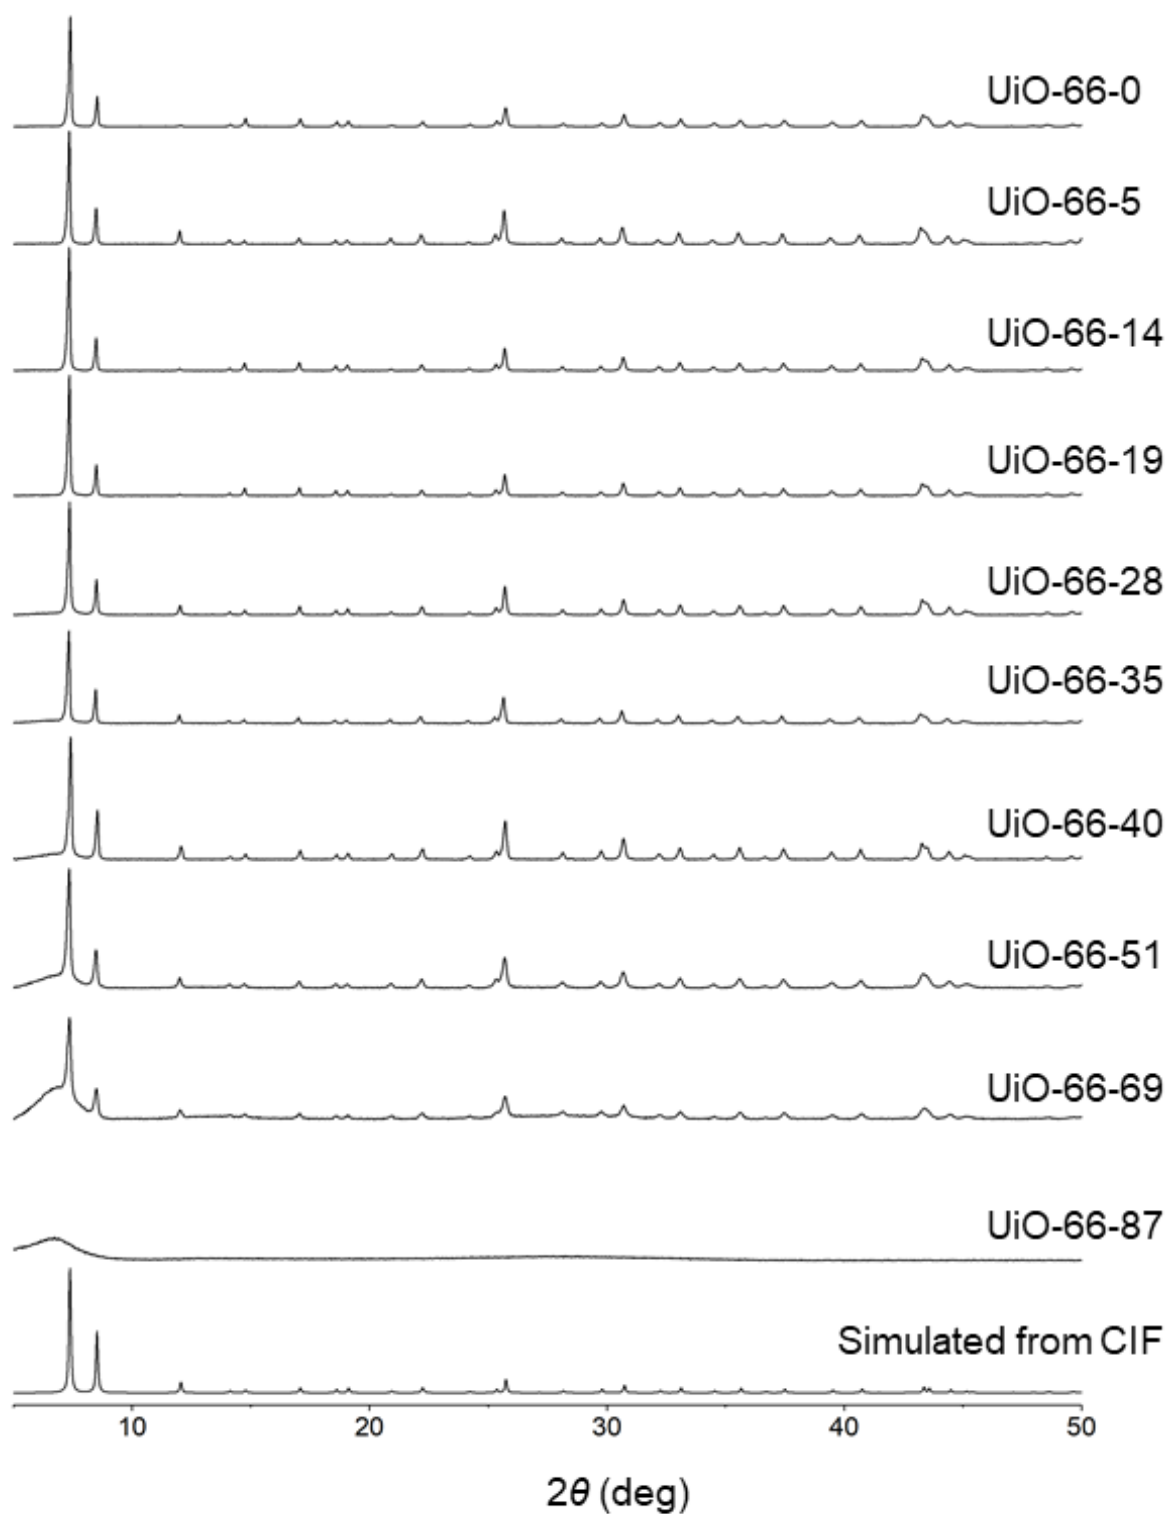

1

Figure S10: Powder X-ray diffraction patterns of UiO-66-x samples (before thermolysis)



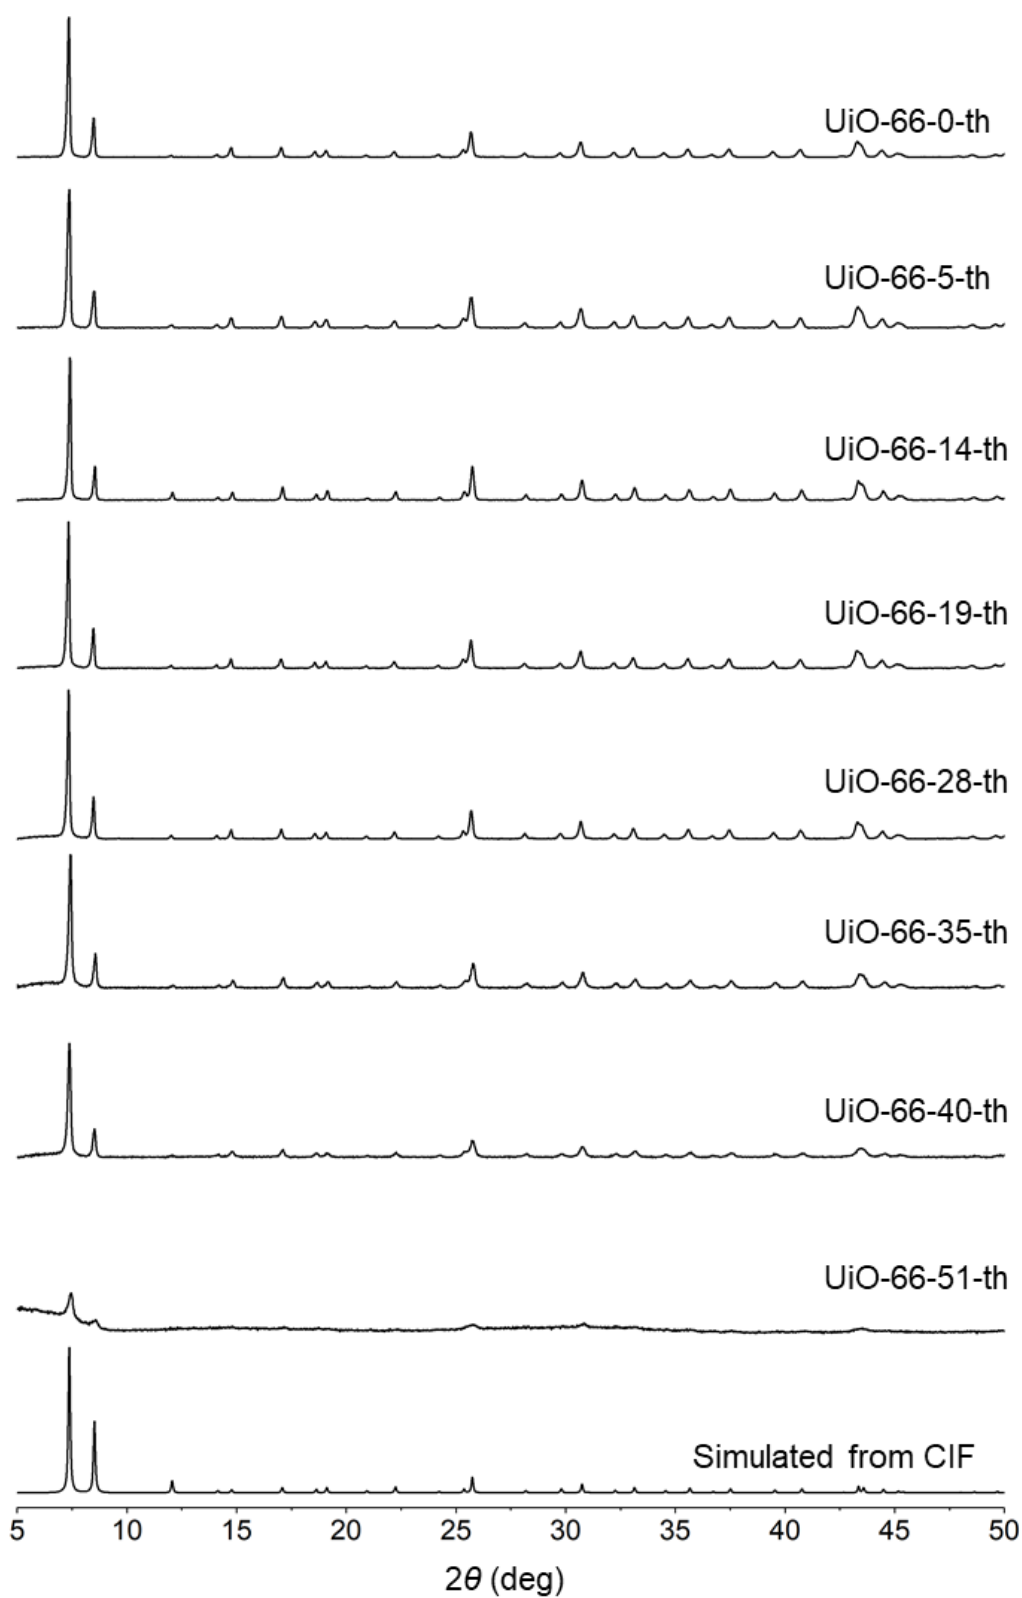

Figure S11: Powder X-ray diffraction patterns of UiO-66-x-th samples (after thermolysis)

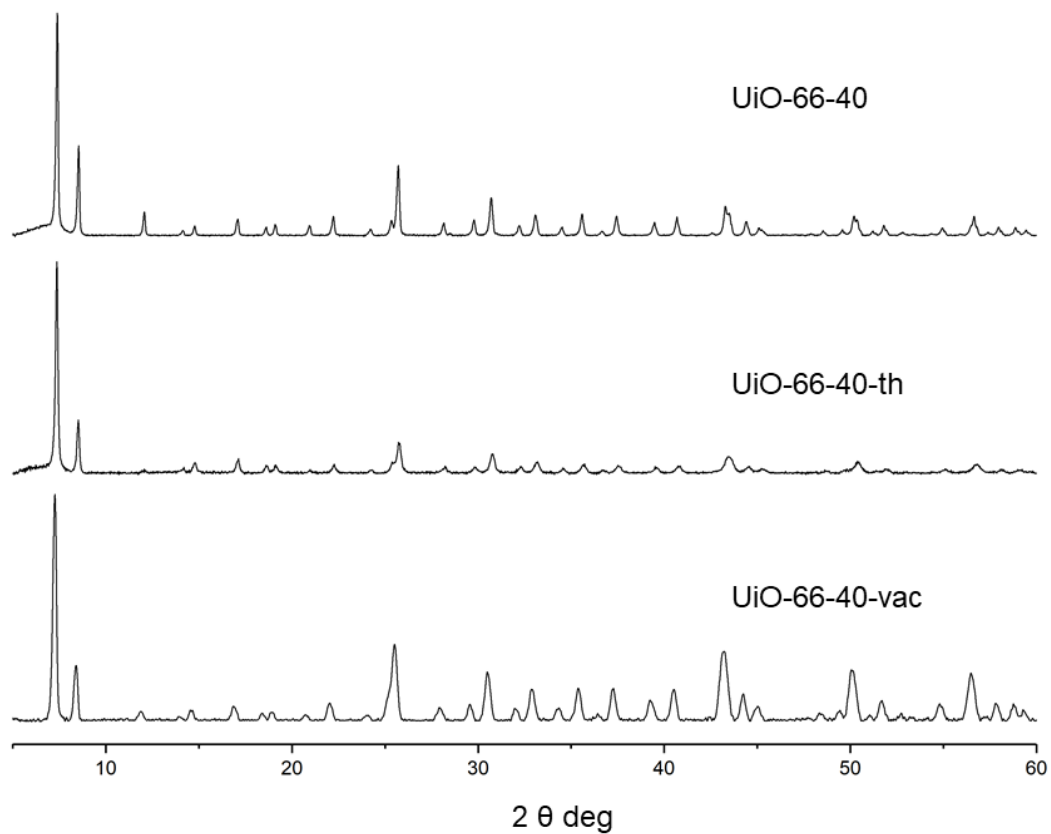

Figure S12: Comparison of XRD patterns of UiO-66-40, as synthesized, after thermolysis and after evacuation.

Table S5: List of selected peaks, full width at half maximum (FWHM) and crystallite size calculated by the Scherrer equation.

| 2 $\theta$ (deg) | FWHM (deg) |              |                   | Crystallite size (nm) |              |                   |
|------------------|------------|--------------|-------------------|-----------------------|--------------|-------------------|
|                  | UiO-66-40  | UiO-66-40-th | UiO-66-40-<br>vac | UiO-66-40             | UiO-66-40-th | UiO-66-40-<br>vac |
| 7.4              | 0.14       | 0.17         | 0.23              | 56                    | 47           | 35                |
| 8.5              | 0.14       | 0.16         | 0.23              | 59                    | 49           | 35                |
| 25.7             | 0.17       | 0.19         | 0.29              | 47                    | 42           | 28                |
| 29.8             | 0.16       | 0.25         | 0.42              | 52                    | 32           | 19                |
| 30.7             | 0.18       | 0.26         | 0.33              | 45                    | 32           | 25                |
| 33.1             | 0.18       | 0.25         | 0.20              | 45                    | 33           | 41                |
| 35.6             | 0.18       | 0.24         | 0.32              | 47                    | 35           | 26                |
| 37.5             | 0.19       | 0.24         | 0.31              | 45                    | 35           | 27                |
| 40.7             | 0.19       | 0.25         | 0.31              | 45                    | 34           | 27                |

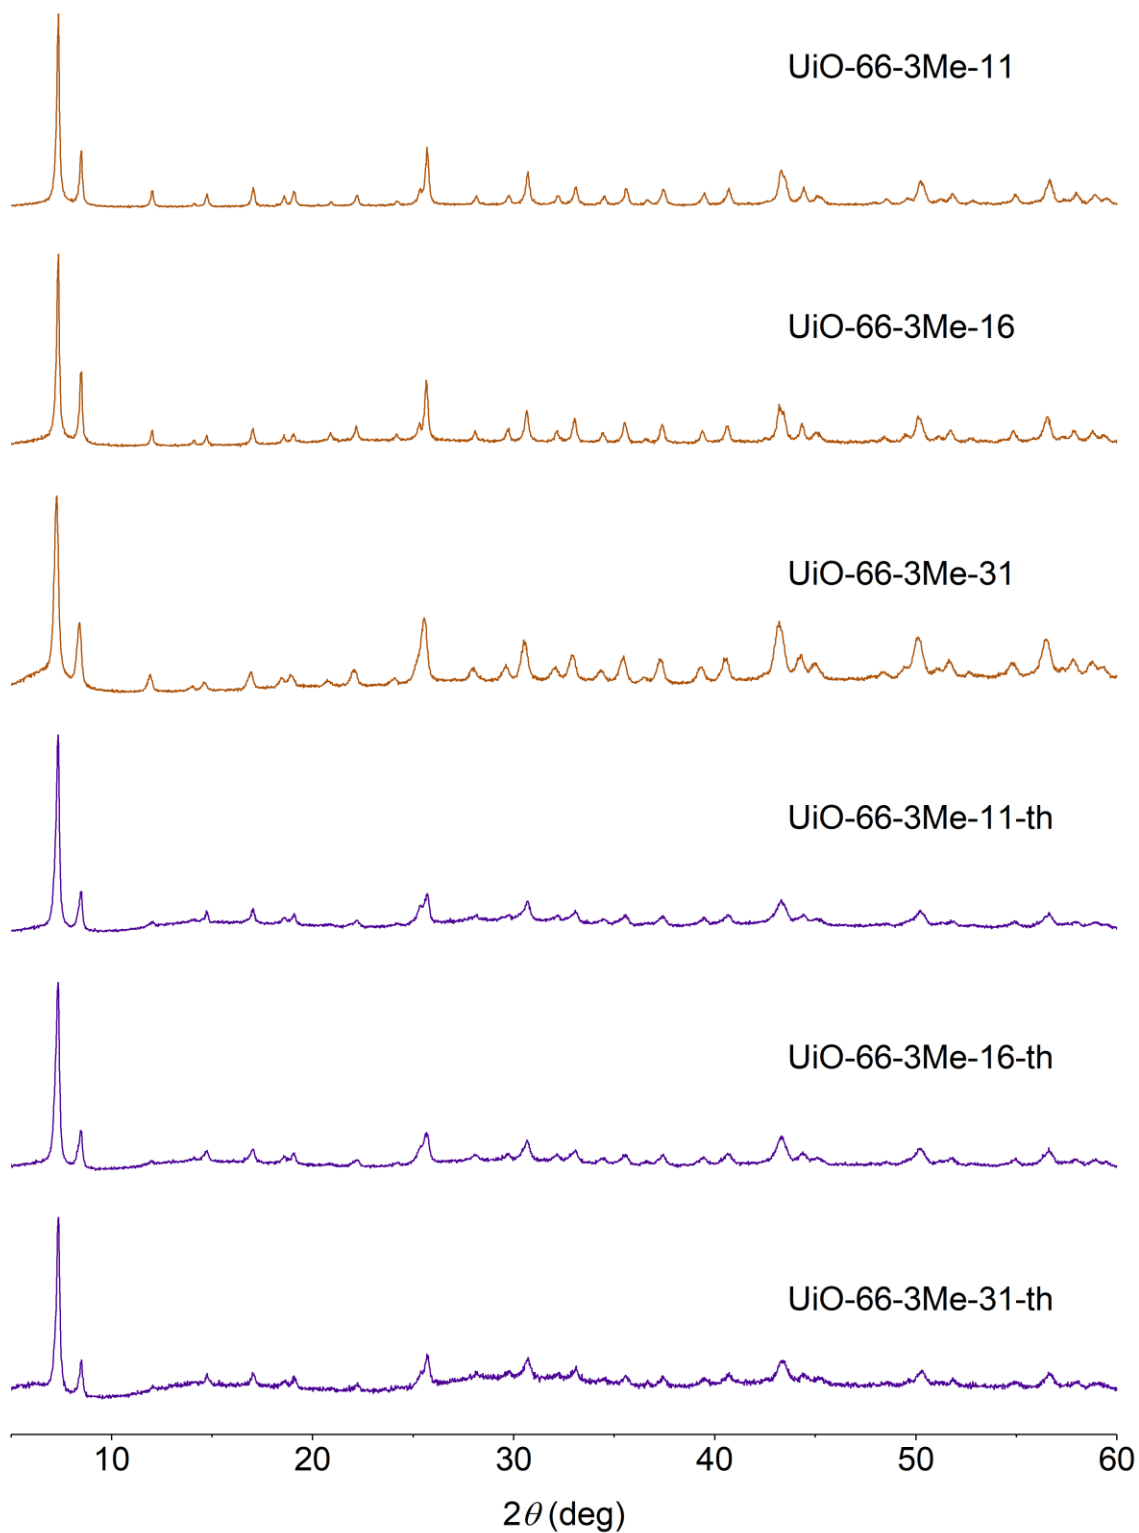

Figure S13: Powder X-ray diffraction patterns of mixed ligand MOFs containing 3-methyladipate and terephthalate before thermolysis, UiO-66-3Me- $x$  (highlighted in orange) and after thermolysis, UiO-66-3Me- $x$ -th (highlighted in purple).

#### 4. NMR of Digested UiO-66 samples

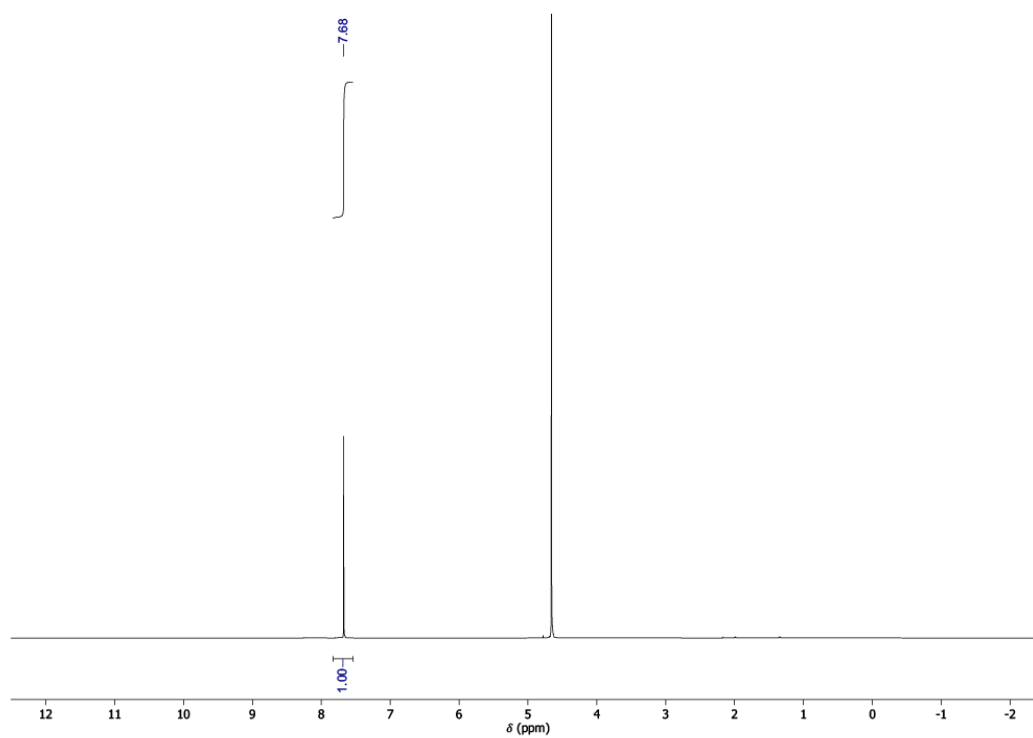

Figure S14.  $^1\text{H}$  NMR spectrum of UiO-66-0 digested in  $\text{K}_3\text{PO}_4$  in  $\text{D}_2\text{O}$ .

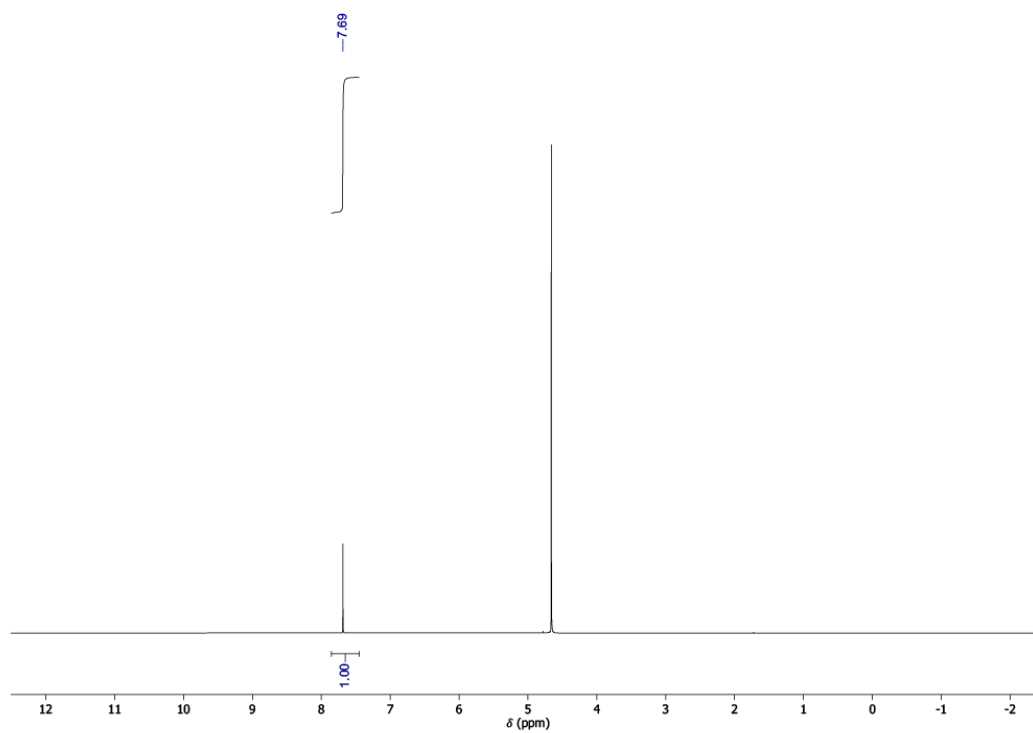

Figure S15.  $^1\text{H}$  NMR spectrum of UiO-66-0-th digested in  $\text{K}_3\text{PO}_4$  in  $\text{D}_2\text{O}$ .

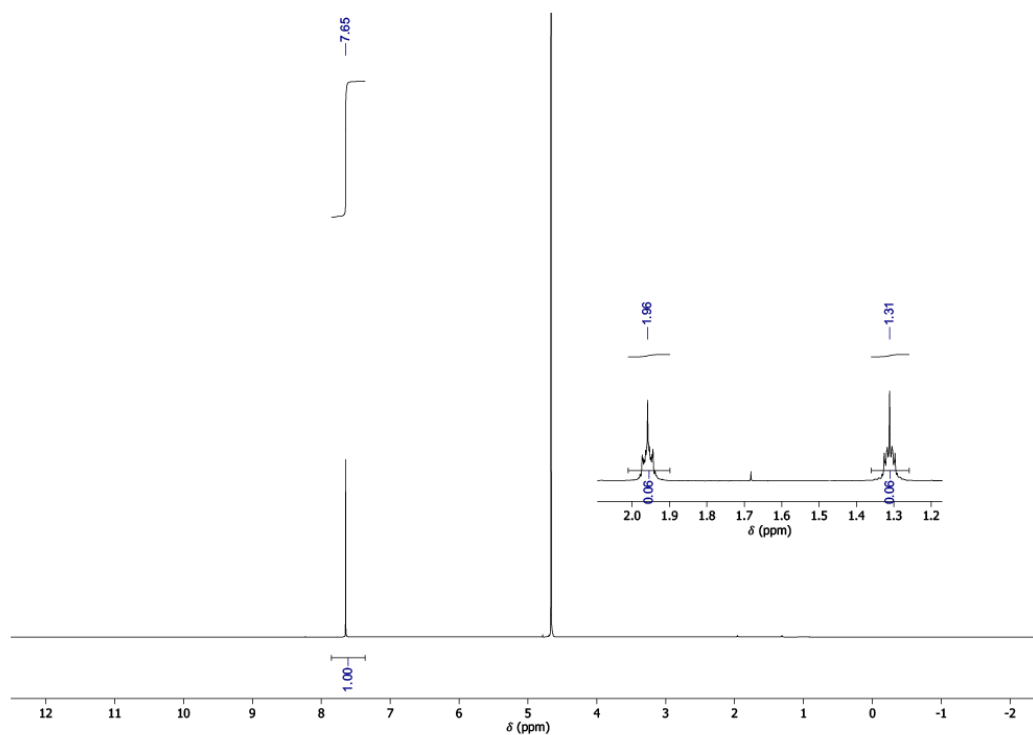

Figure S16.  $^1\text{H}$  NMR spectrum of UiO-66-5 digested in  $\text{K}_3\text{PO}_4$  in  $\text{D}_2\text{O}$ .

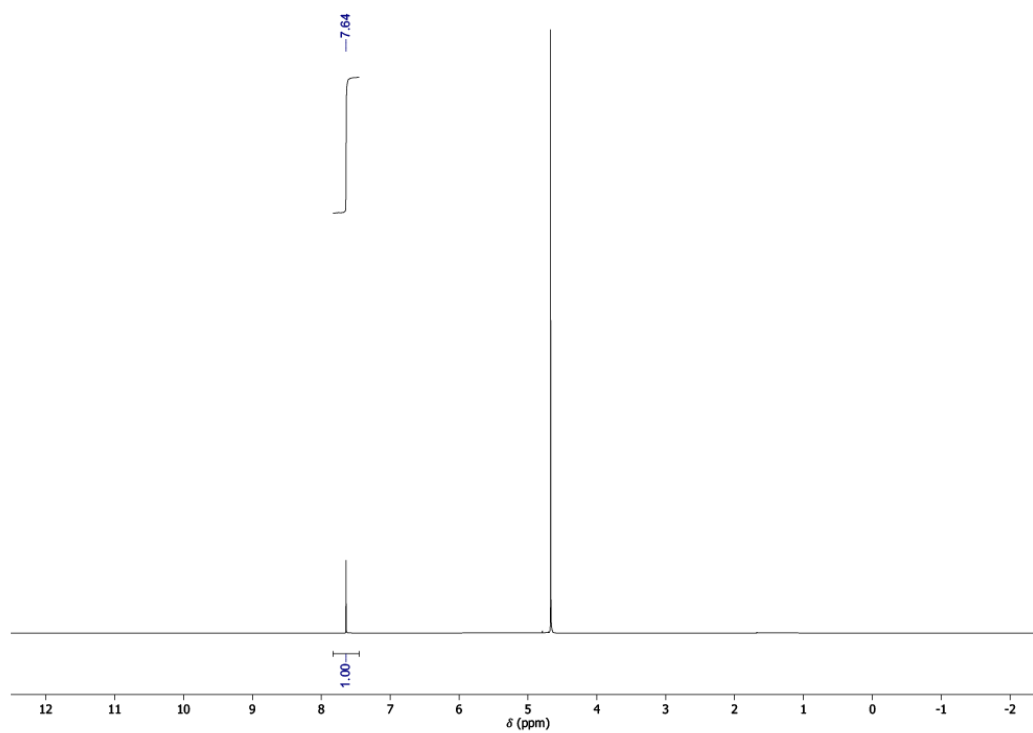

Figure S17.  $^1\text{H}$  NMR spectrum of UiO-66-5-th digested in  $\text{K}_3\text{PO}_4$  in  $\text{D}_2\text{O}$ .

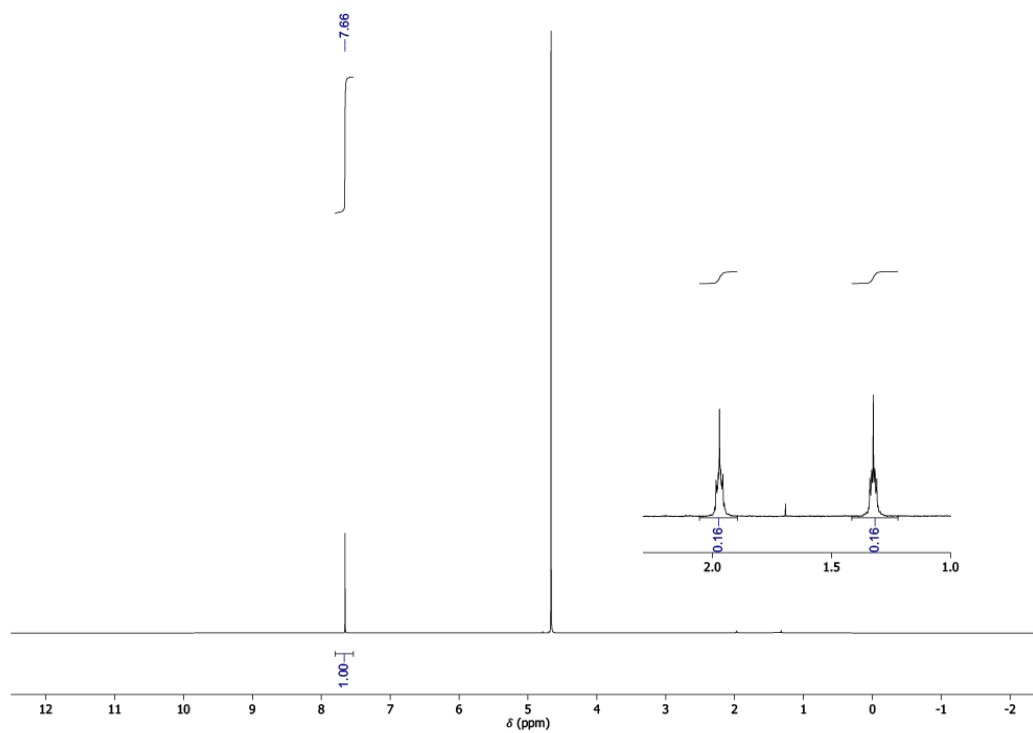

Figure S18.  $^1\text{H}$  NMR spectrum of UiO-66-14 digested in  $\text{K}_3\text{PO}_4$  in  $\text{D}_2\text{O}$ .

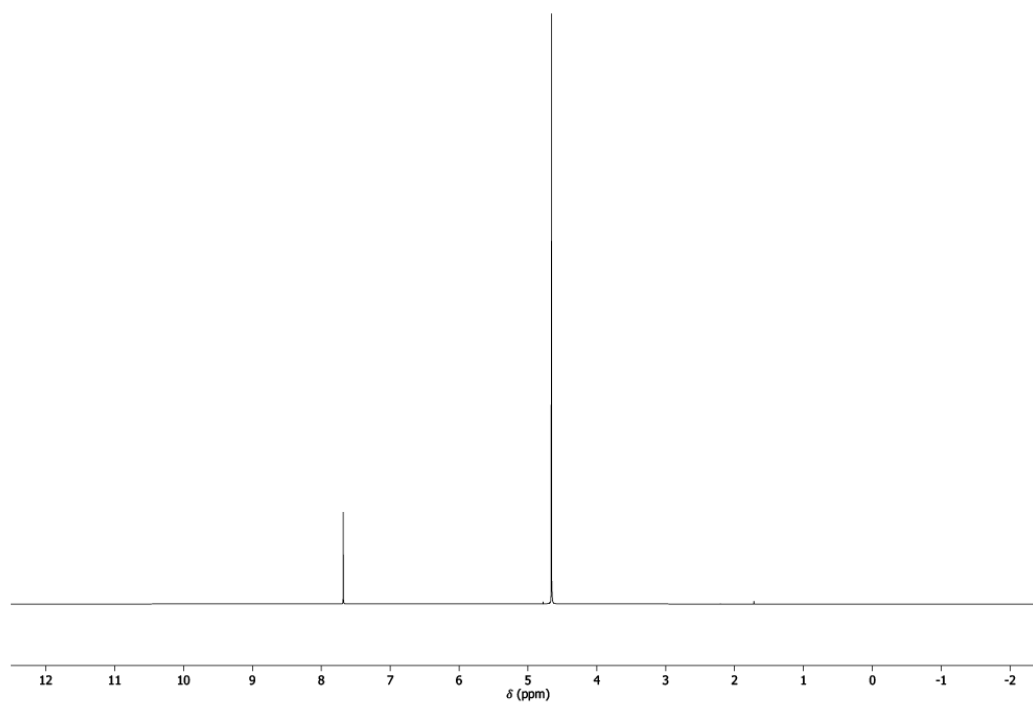

Figure S19.  $^1\text{H}$  NMR spectrum of UiO-66-14-th digested in  $\text{K}_3\text{PO}_4$  in  $\text{D}_2\text{O}$ .

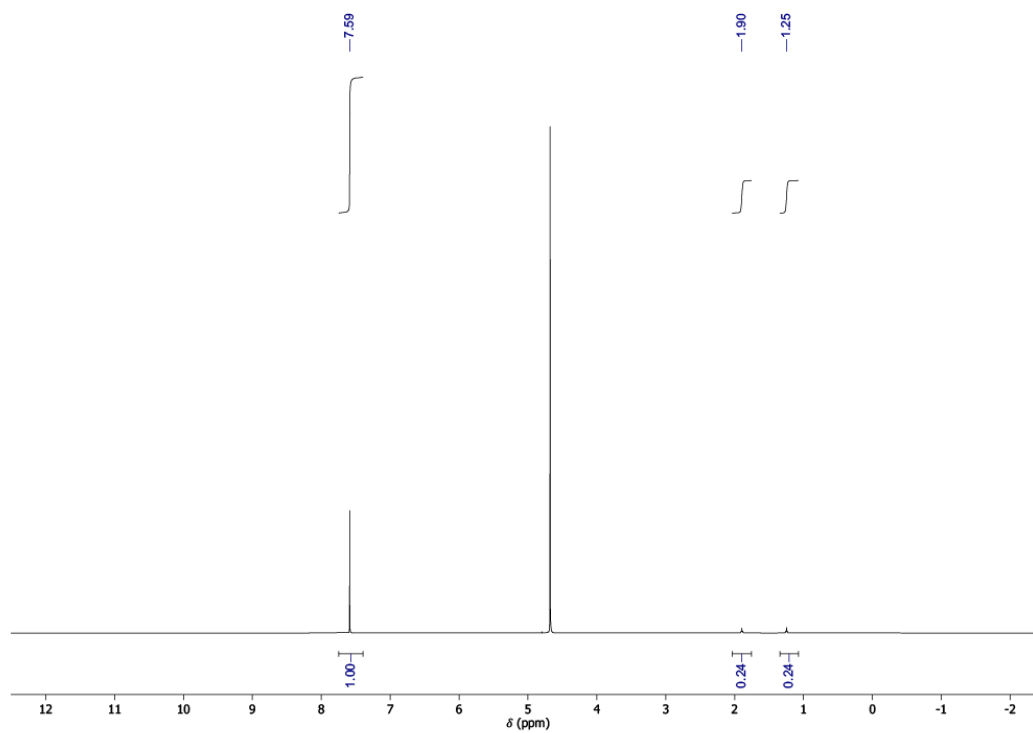

Figure S20.  $^1\text{H}$  NMR spectrum of UiO-66-19 digested in  $\text{K}_3\text{PO}_4$  in  $\text{D}_2\text{O}$ .

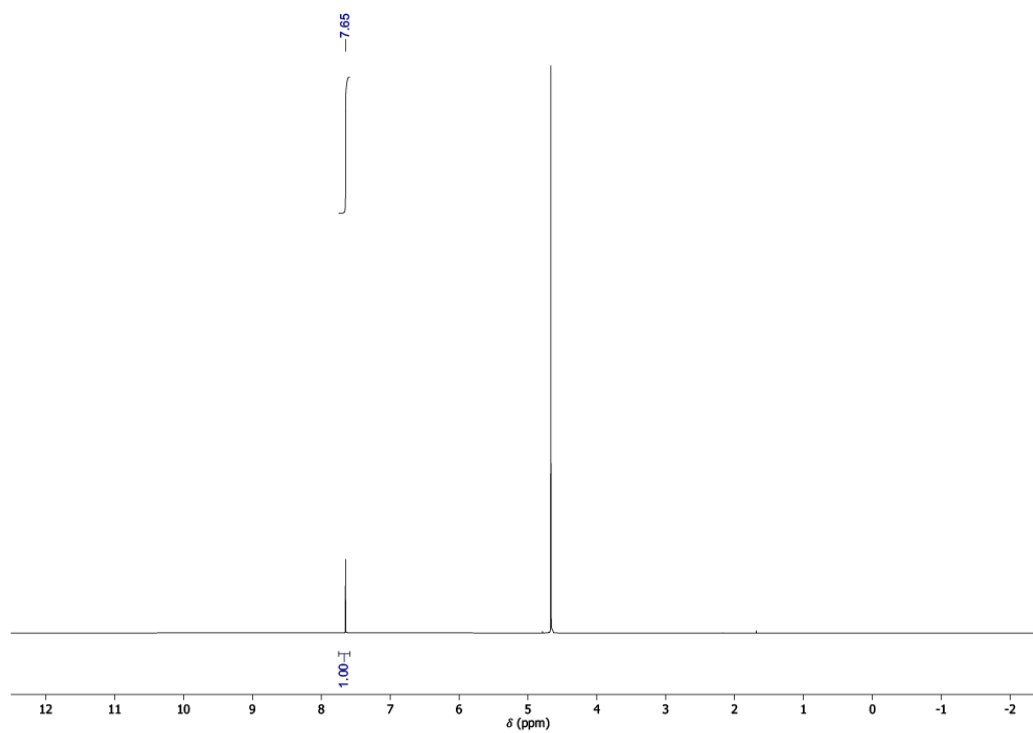

Figure S21.  $^1\text{H}$  NMR spectrum of UiO-66-19-th digested in  $\text{K}_3\text{PO}_4$  in  $\text{D}_2\text{O}$ .

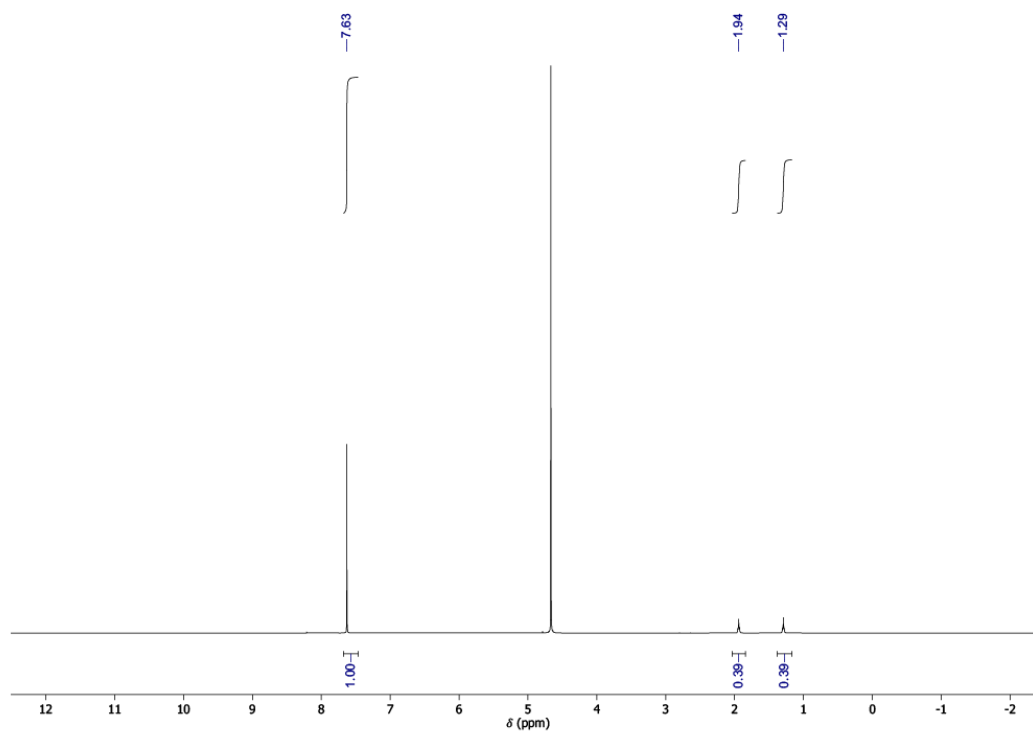

Figure S22.  $^1\text{H}$  NMR spectrum of UiO-66-28 digested in  $\text{K}_3\text{PO}_4$  in  $\text{D}_2\text{O}$ .

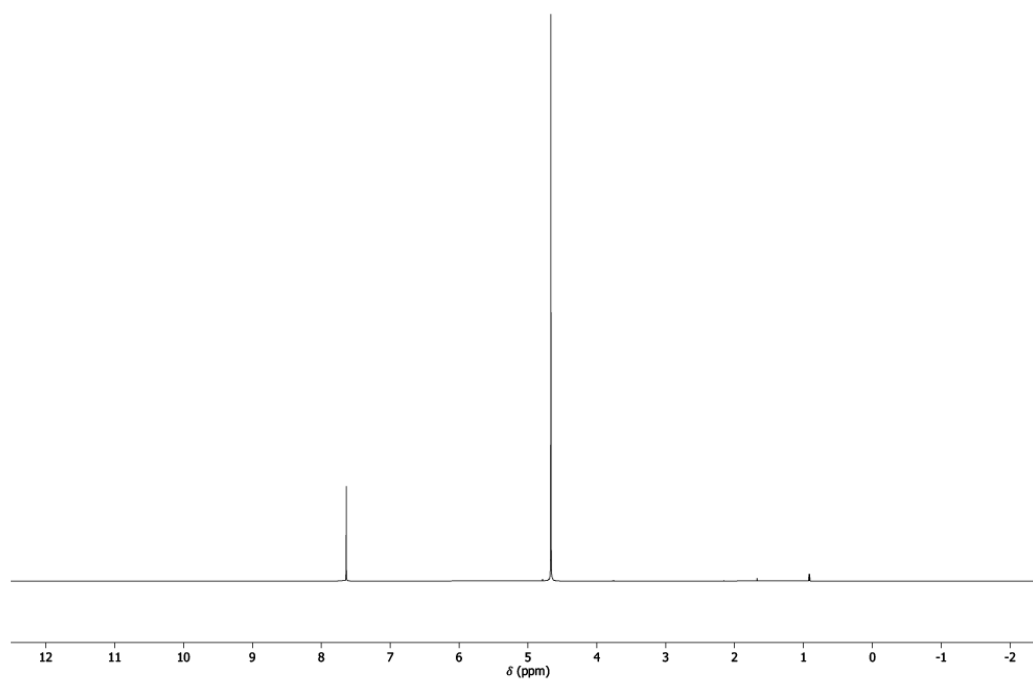

Figure S23.  $^1\text{H}$  NMR spectrum of UiO-66-28-th digested in  $\text{K}_3\text{PO}_4$  in  $\text{D}_2\text{O}$ .



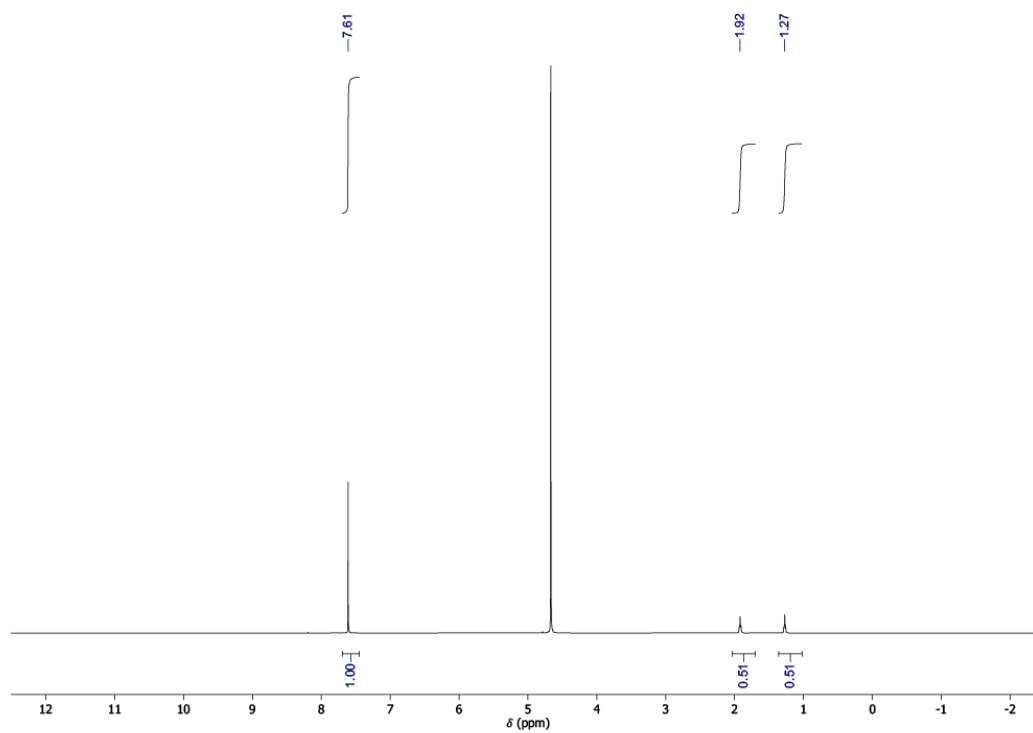

Figure S24.  $^1\text{H}$  NMR spectrum of UiO-66-35 digested in  $\text{K}_3\text{PO}_4$  in  $\text{D}_2\text{O}$ .

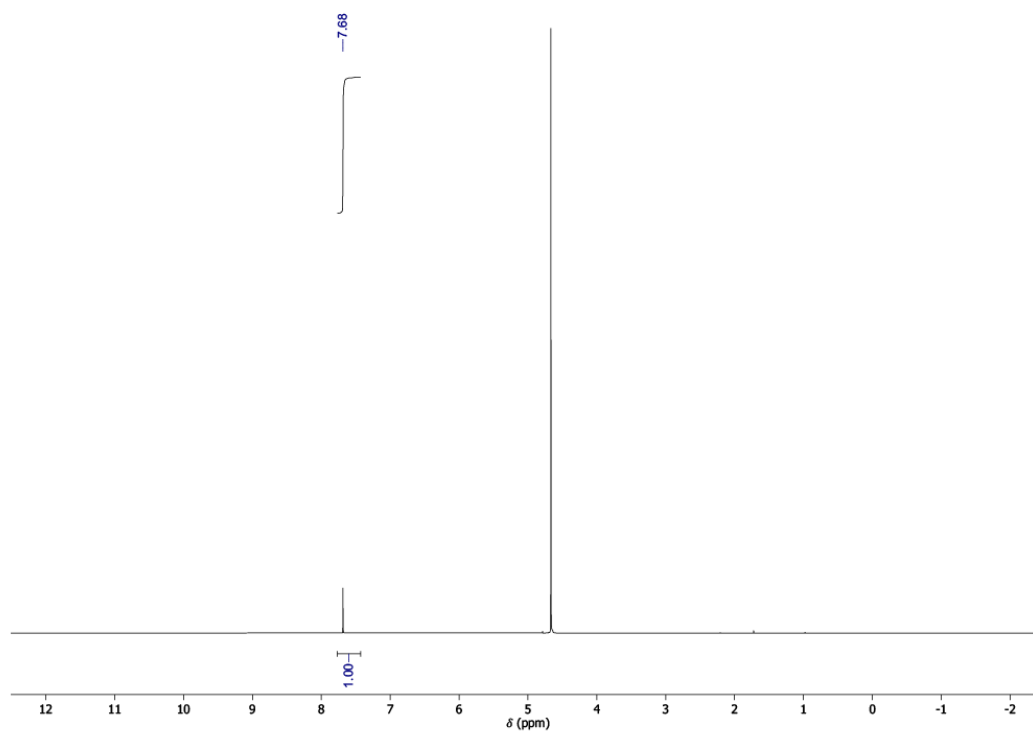

Figure S25.  $^1\text{H}$  NMR spectrum of UiO-66-35-th digested in  $\text{K}_3\text{PO}_4$  in  $\text{D}_2\text{O}$ .

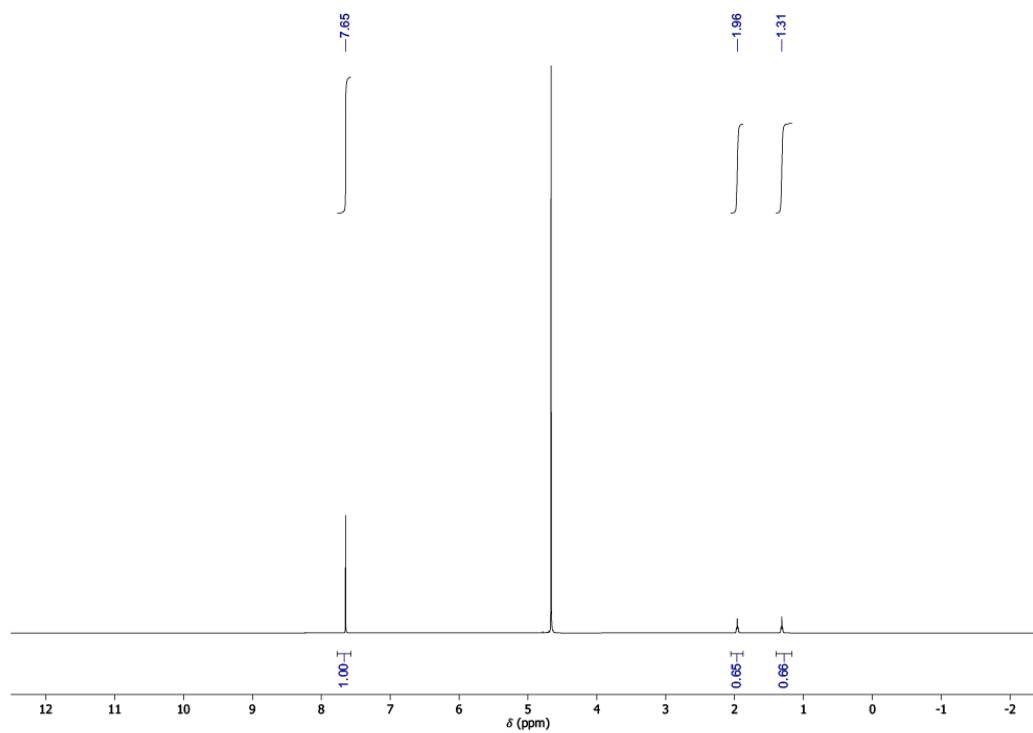

Figure S26.  $^1\text{H}$  NMR spectrum of UiO-66-40 digested in  $\text{K}_3\text{PO}_4$  in  $\text{D}_2\text{O}$ .

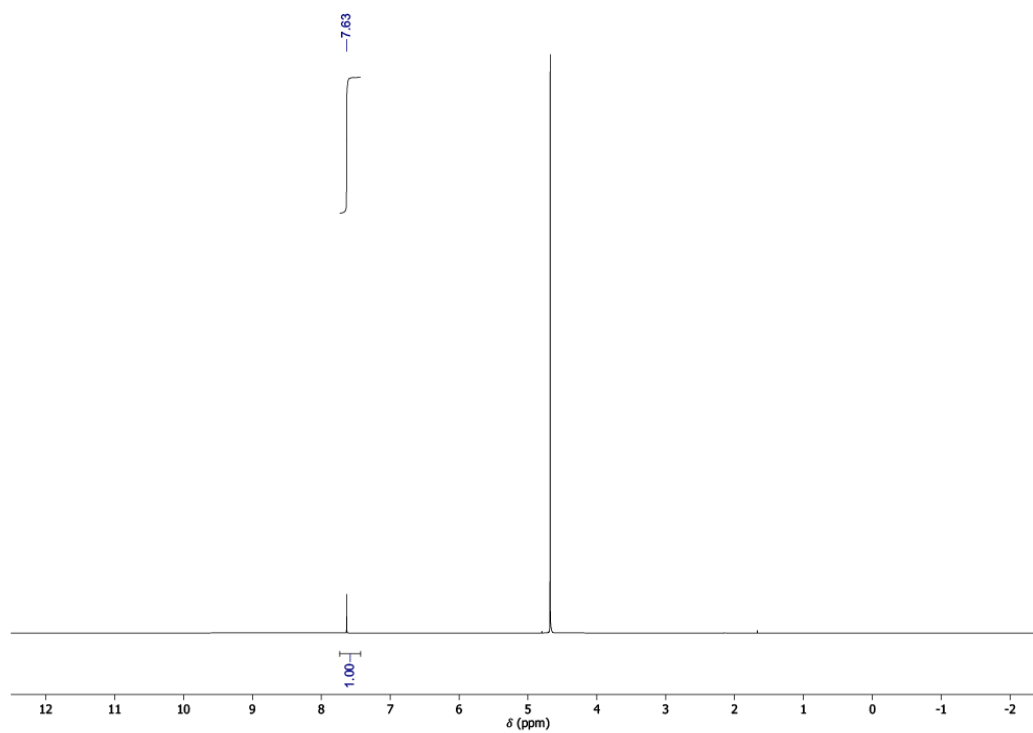

Figure S27.  $^1\text{H}$  NMR spectrum of UiO-66-40-th digested in  $\text{K}_3\text{PO}_4$  in  $\text{D}_2\text{O}$ .

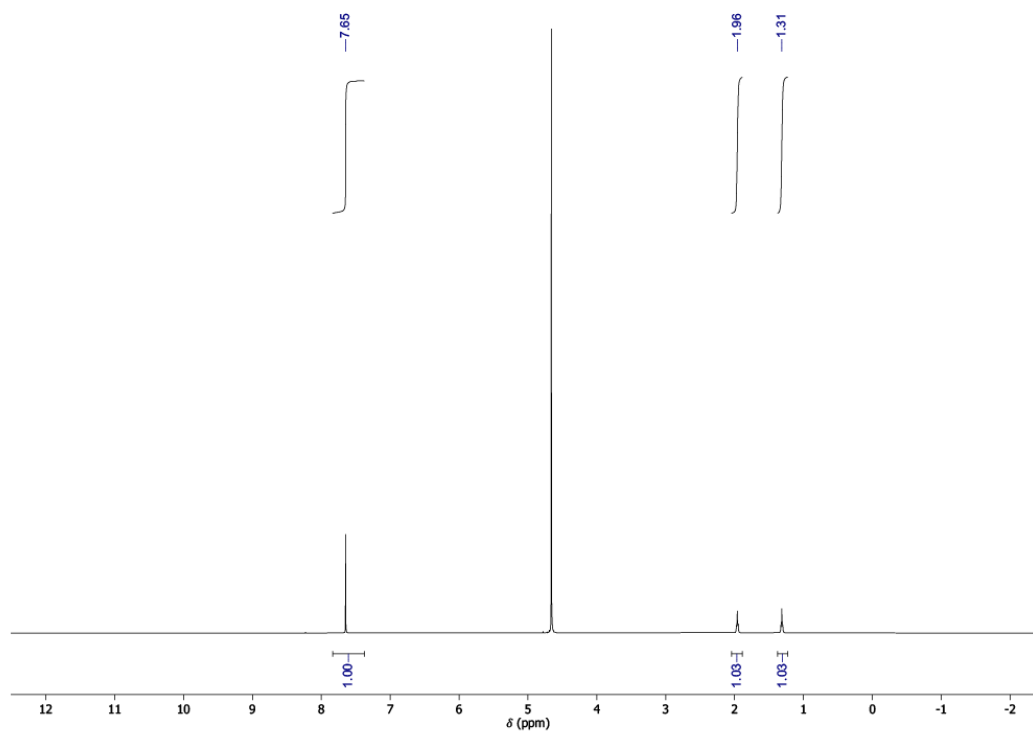

Figure S28.  $^1\text{H}$  NMR spectrum of UiO-66-51 digested in  $\text{K}_3\text{PO}_4$  in  $\text{D}_2\text{O}$ .

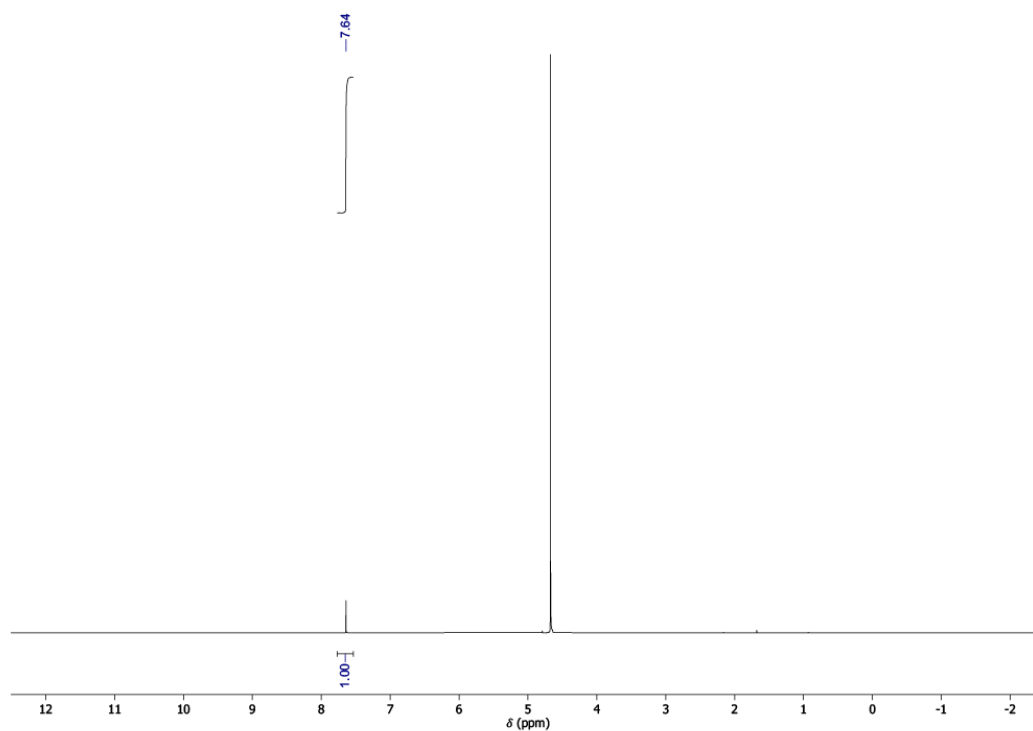

Figure S29.  $^1\text{H}$  NMR spectrum of UiO-66-51-th digested in  $\text{K}_3\text{PO}_4$  in  $\text{D}_2\text{O}$ .

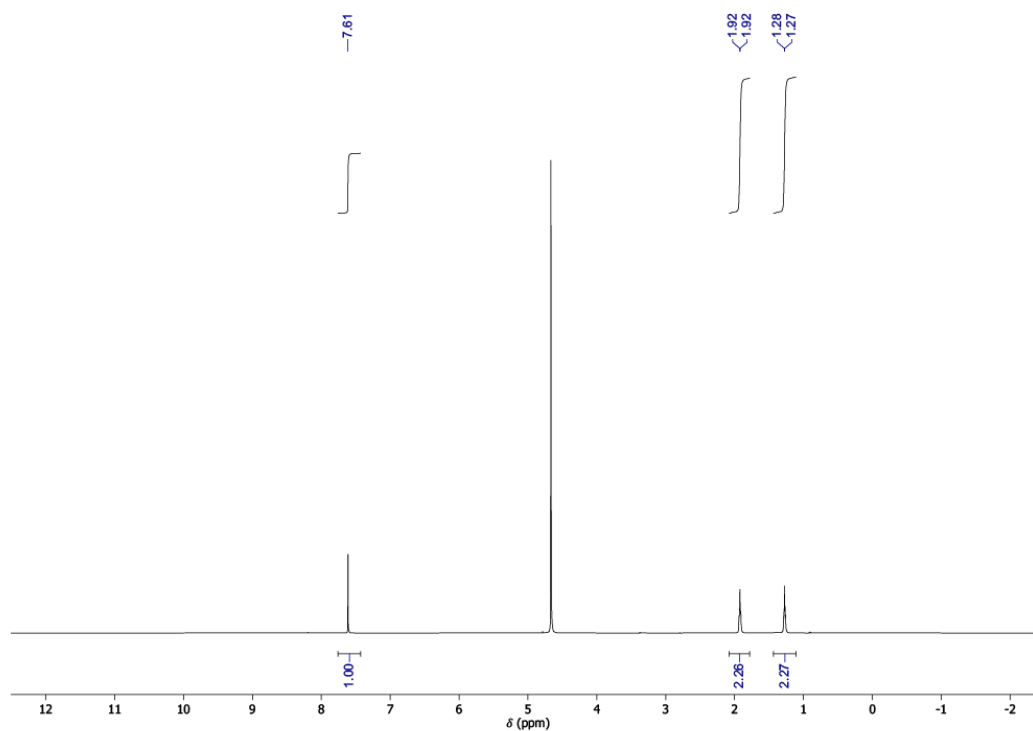

Figure S30.  $^1\text{H}$  NMR spectrum of UiO-66-69 digested in  $\text{K}_3\text{PO}_4$  in  $\text{D}_2\text{O}$ .

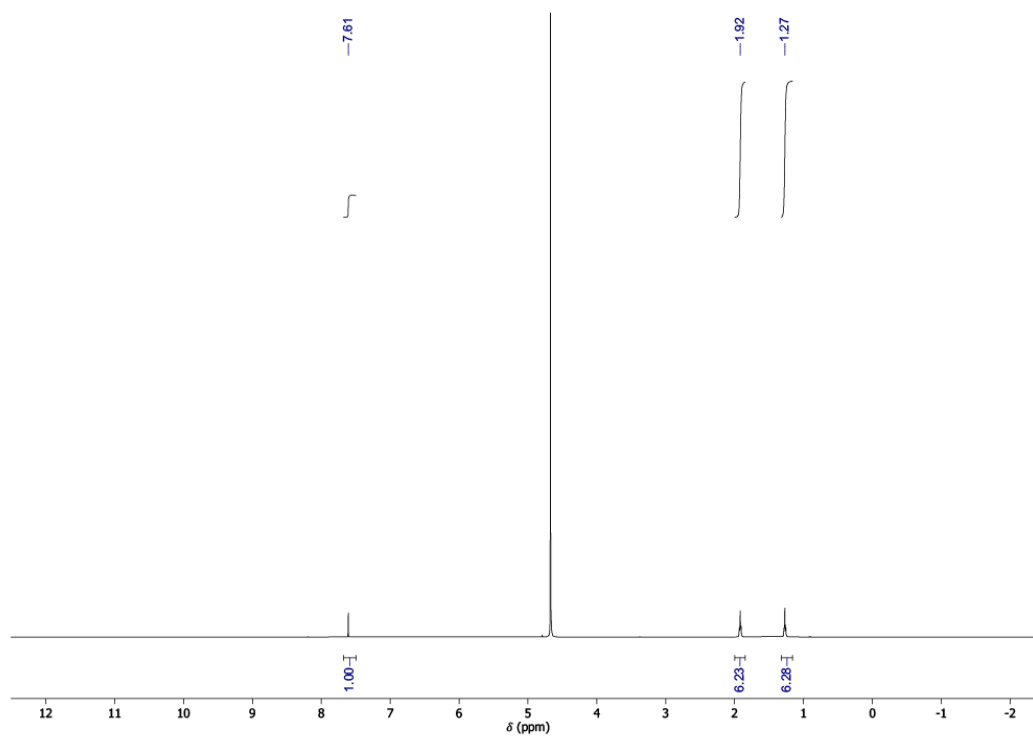

Figure S31.  $^1\text{H}$  NMR spectrum of UiO-66-87 digested in  $\text{K}_3\text{PO}_4$  in  $\text{D}_2\text{O}$ .

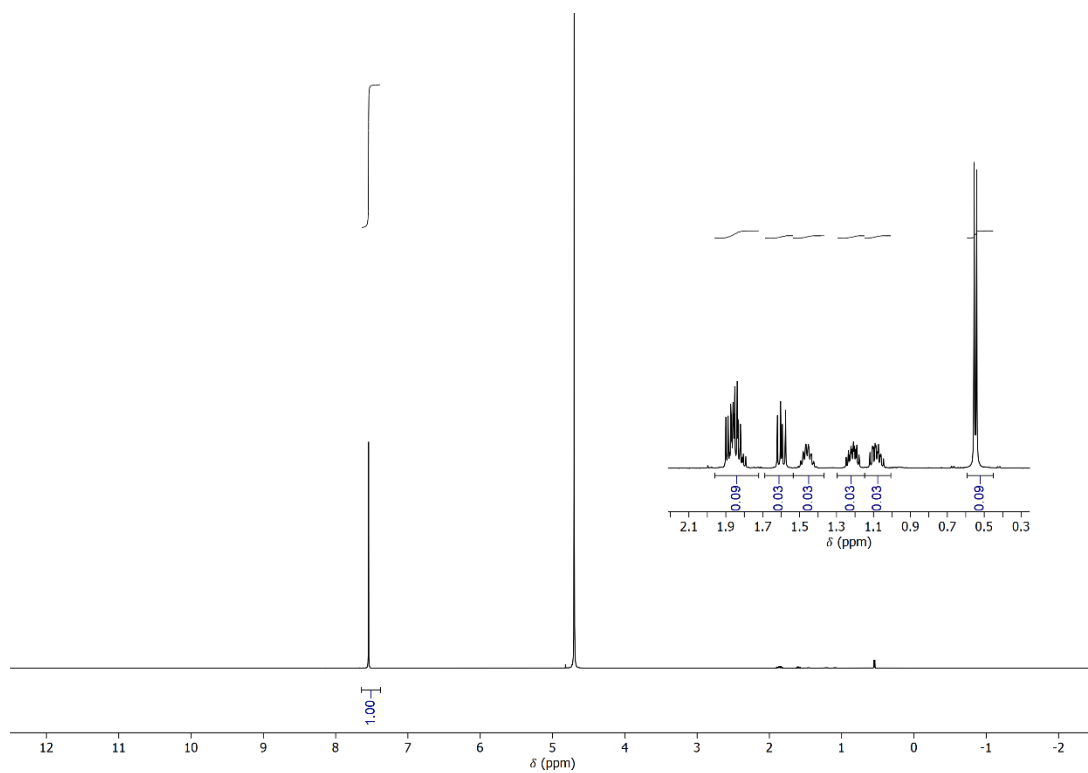

Figure S32.  $^1\text{H}$  NMR spectrum of UiO-66-3Me-11 digested in  $\text{K}_3\text{PO}_4$  in  $\text{D}_2\text{O}$ .

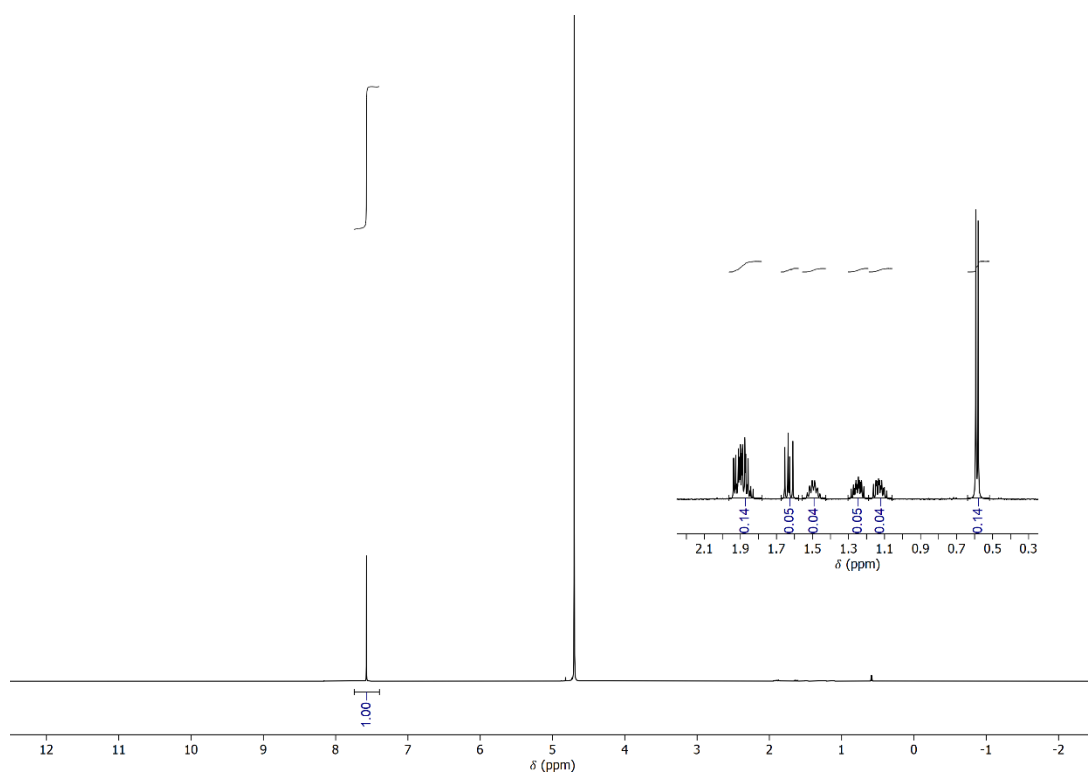

Figure S33.  $^1\text{H}$  NMR spectrum of UiO-66-3Me-16 digested in  $\text{K}_3\text{PO}_4$  in  $\text{D}_2\text{O}$ .

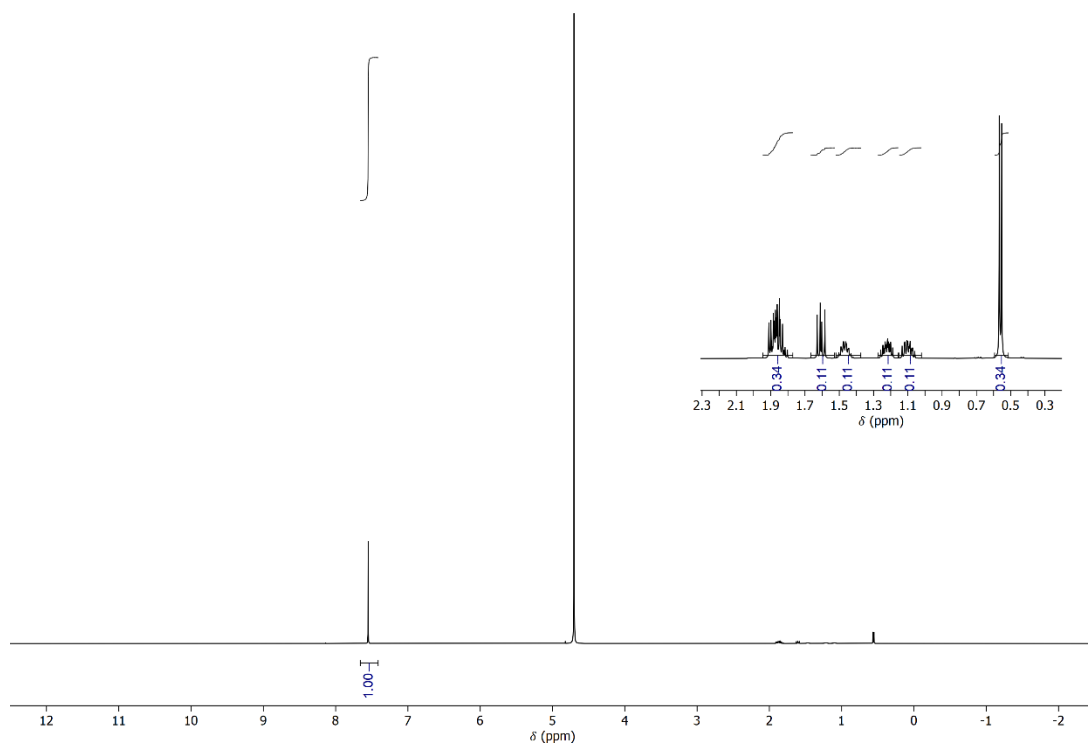

Figure S34.  $^1\text{H}$  NMR spectrum of UiO-66-3Me-31 digested in  $\text{K}_3\text{PO}_4$  in  $\text{D}_2\text{O}$ .

## 5. Solid state NMR

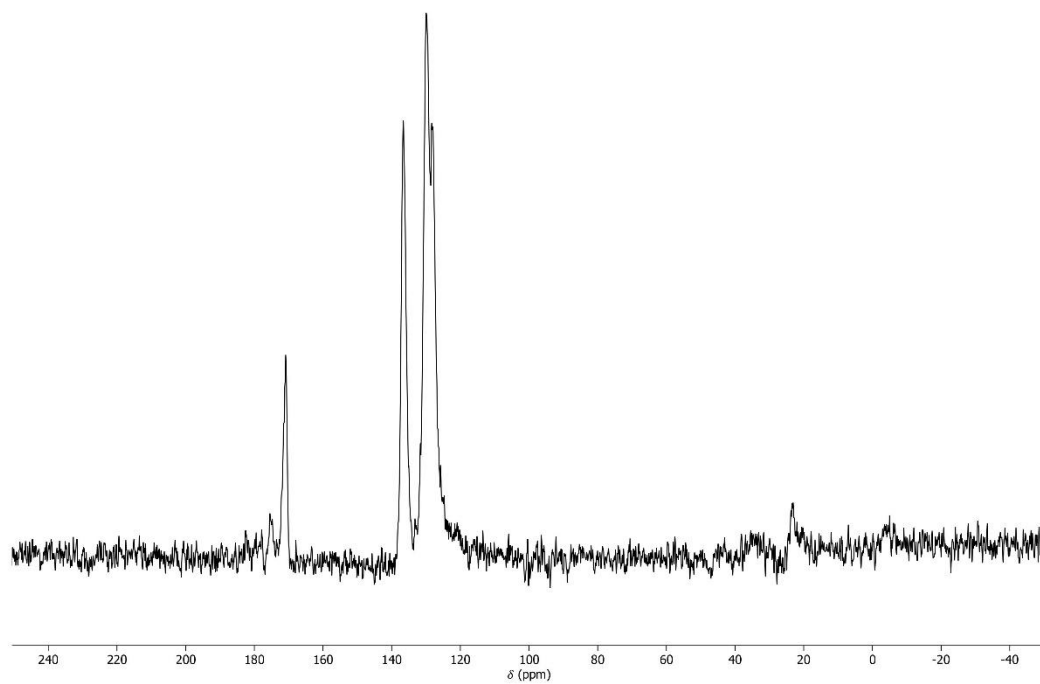

Figure S35. Solid state  $^{13}\text{C}$  NMR spectrum of UiO-66-5.

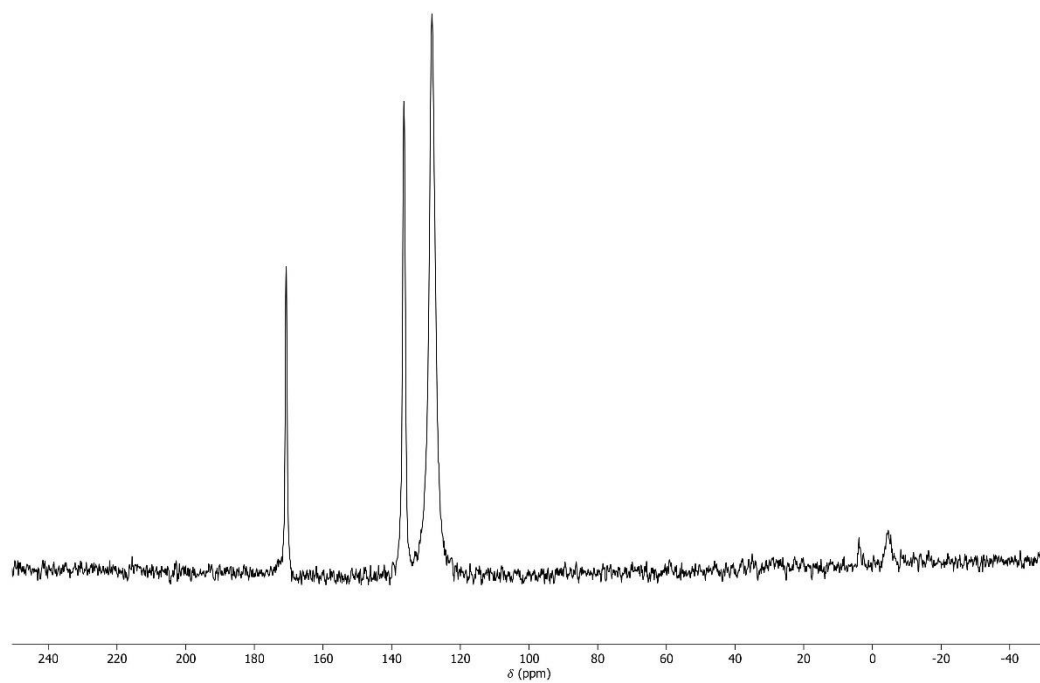

Figure S36. Solid state  $^{13}\text{C}$  NMR spectrum UiO-66-5-th.

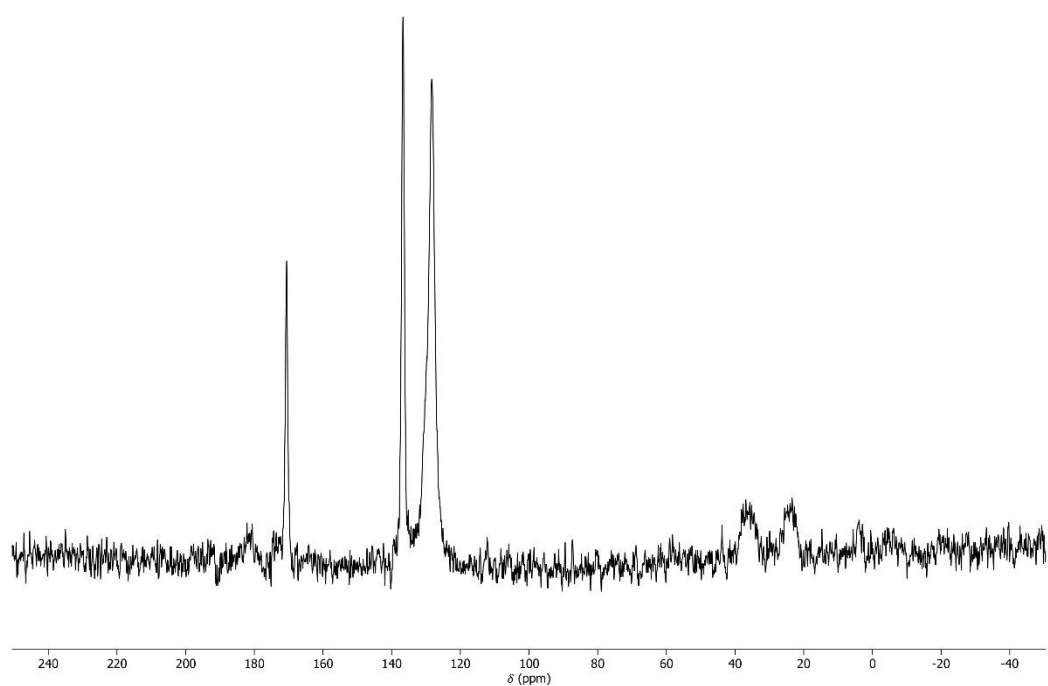

Figure S37. Solid state  $^{13}\text{C}$  NMR spectrum of UiO-66-14.

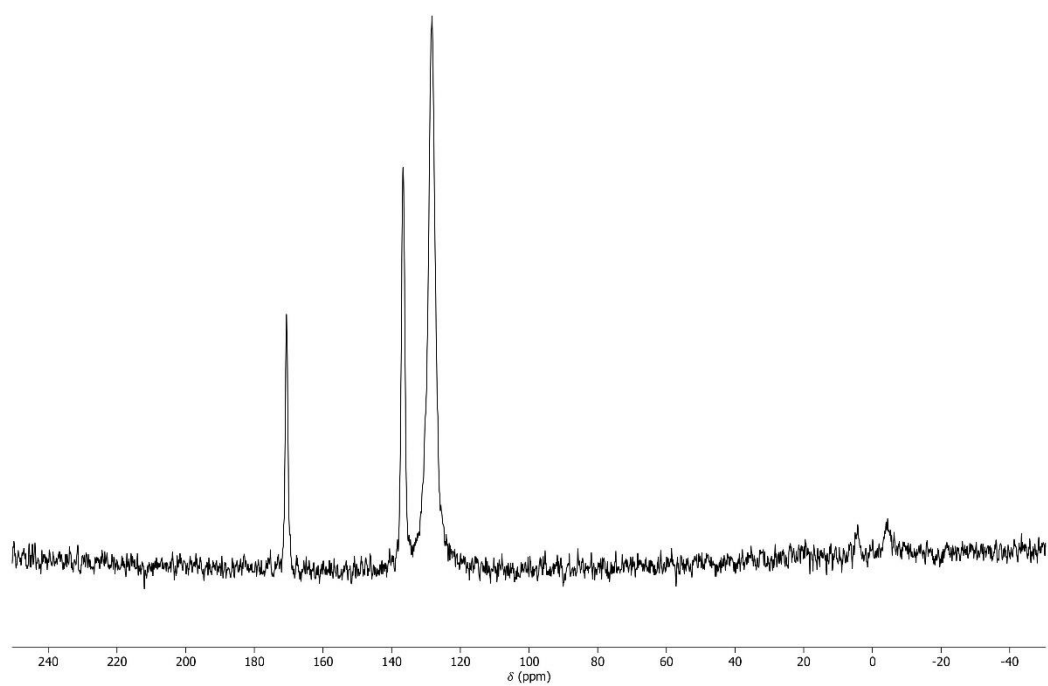

Figure S38. Solid state  $^{13}\text{C}$  NMR spectrum of UiO-66-14-th.



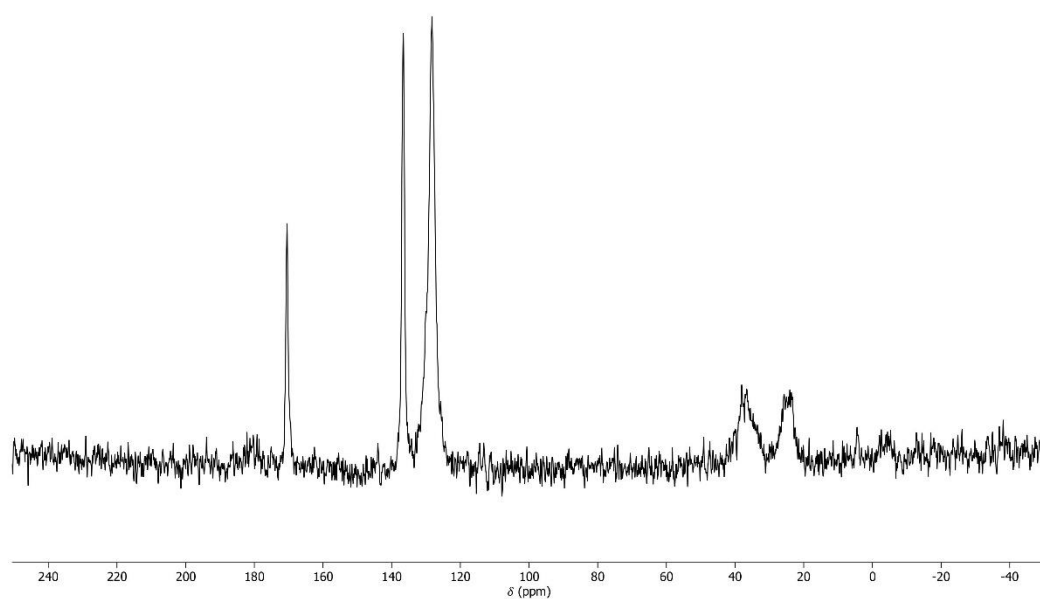

Figure S39. Solid state  $^{13}\text{C}$  NMR spectrum of UiO-66-19

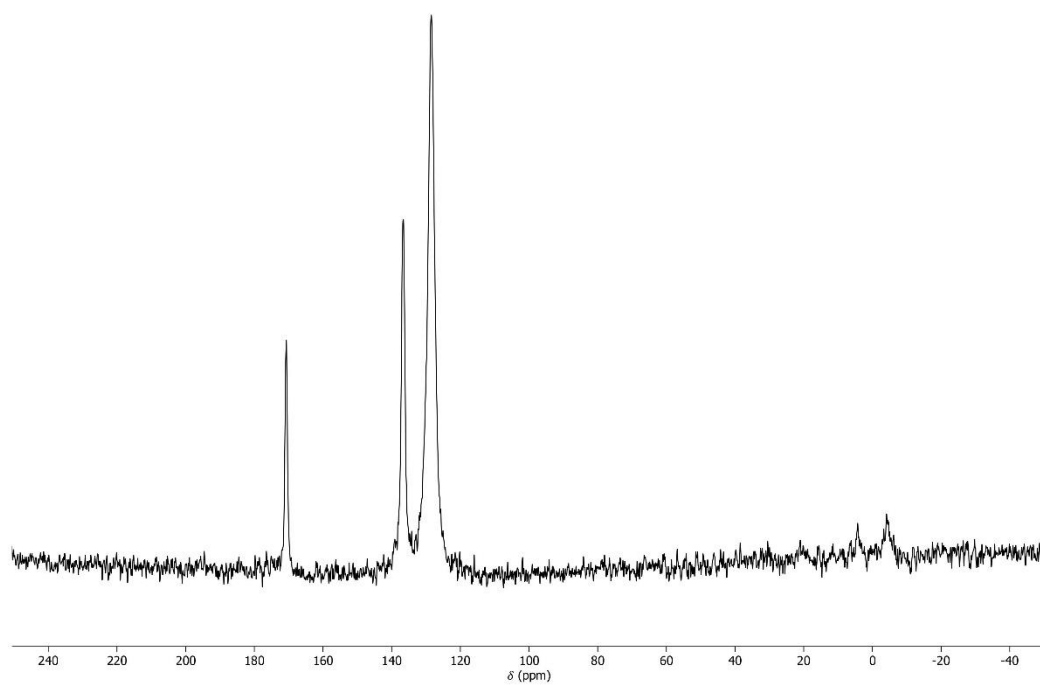

Figure S40. Solid state  $^{13}\text{C}$  NMR spectrum of UiO-66-19-th

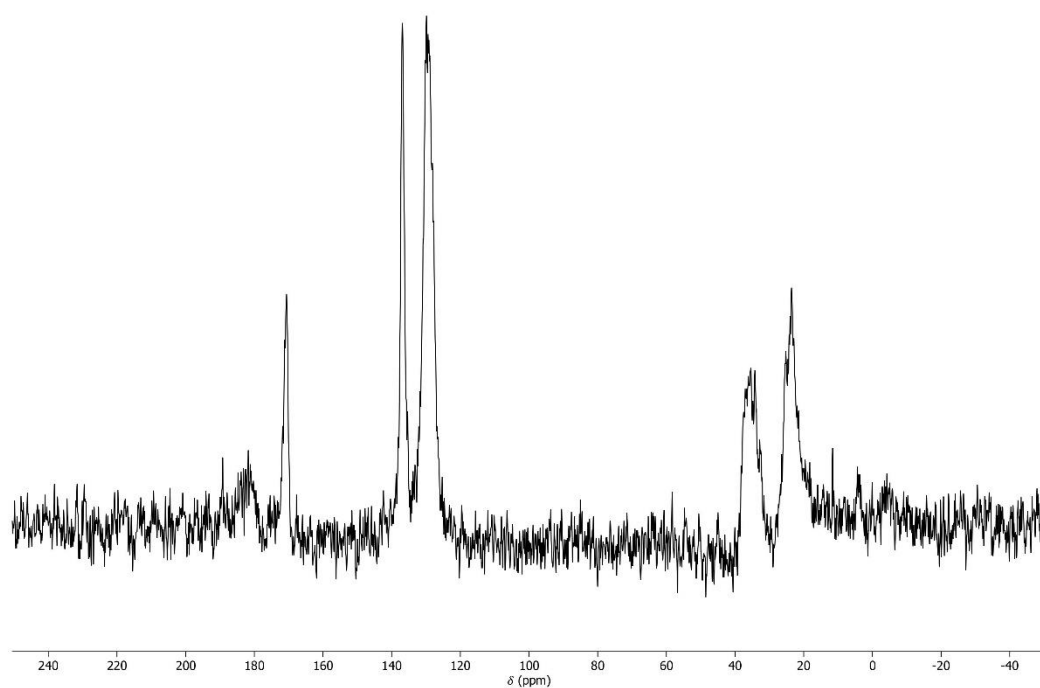

Figure S41. Solid state  $^{13}\text{C}$  NMR spectrum of UiO-66-28.

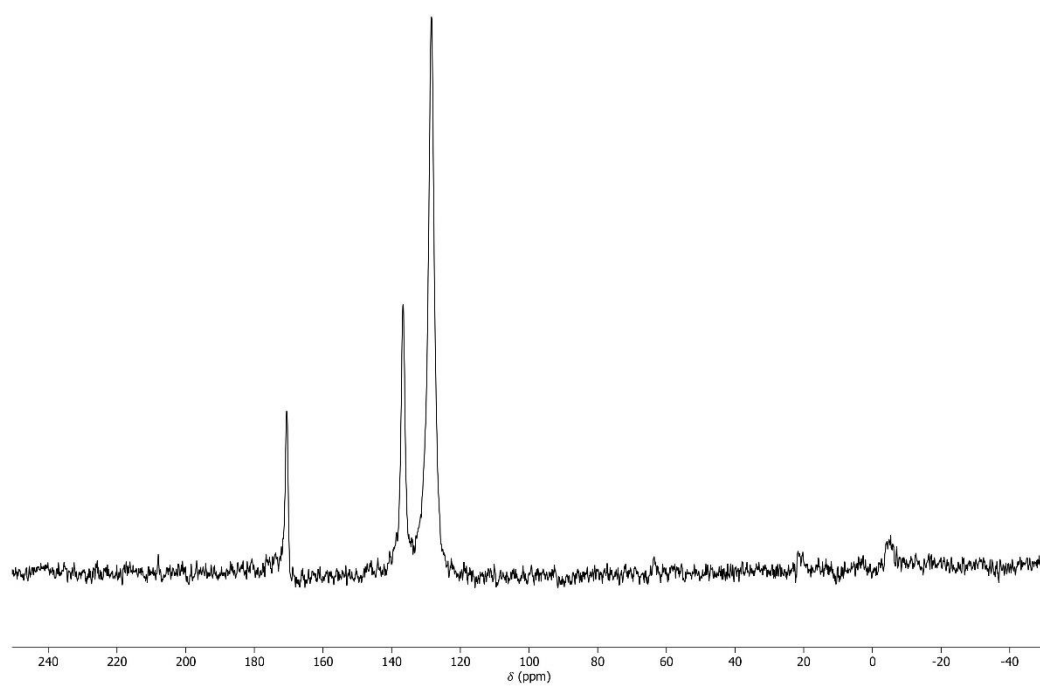

Figure S42. Solid state  $^{13}\text{C}$  NMR spectrum of UiO-66-28-th.

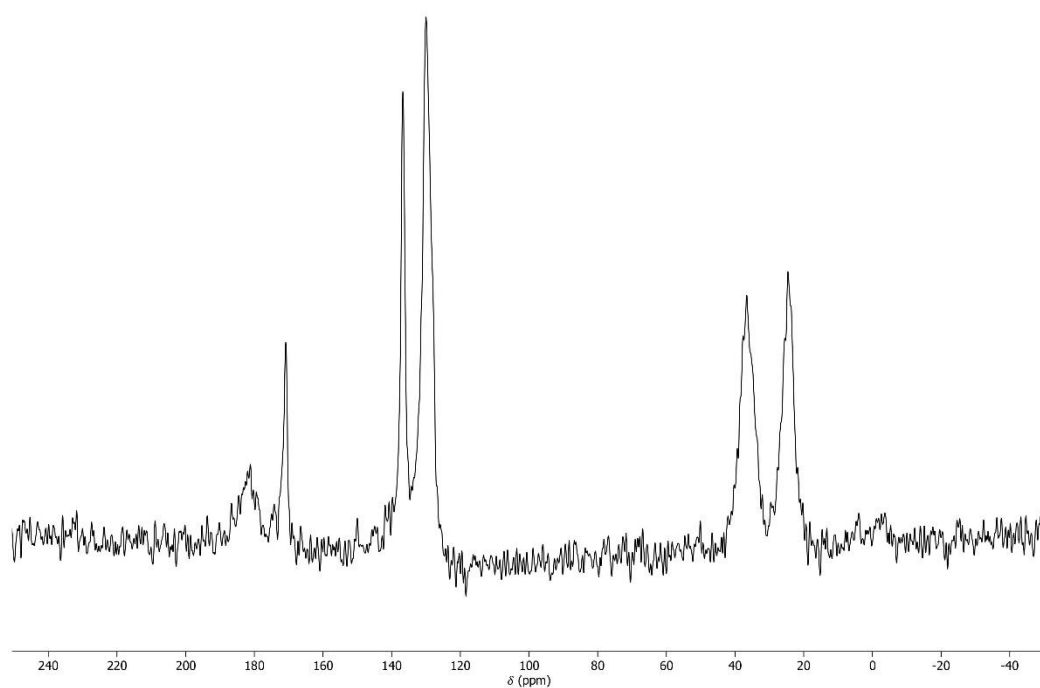

Figure S43. Solid state  $^{13}\text{C}$  NMR spectrum of UiO-66-35.

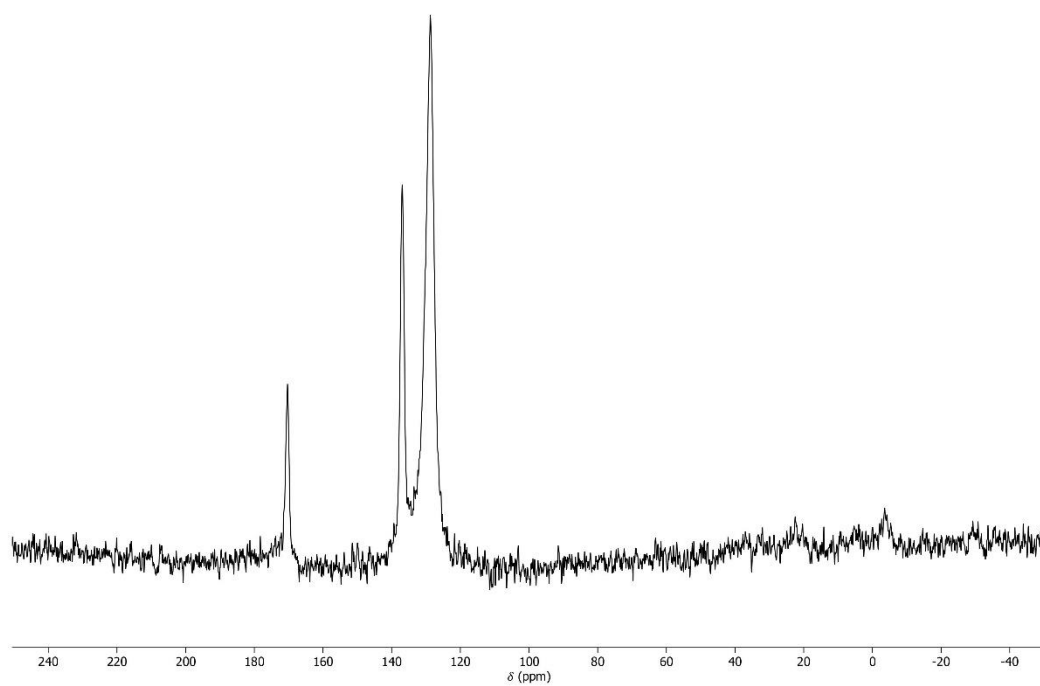

Figure S44. Solid state  $^{13}\text{C}$  NMR spectrum of UiO-66-35-th.

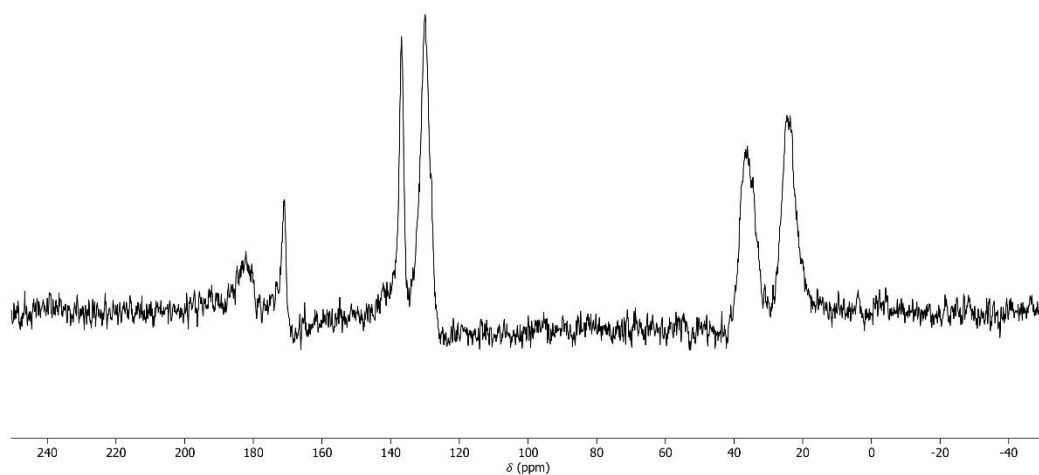

Figure S45. Solid state  $^{13}\text{C}$  NMR spectrum of UiO-66-40.

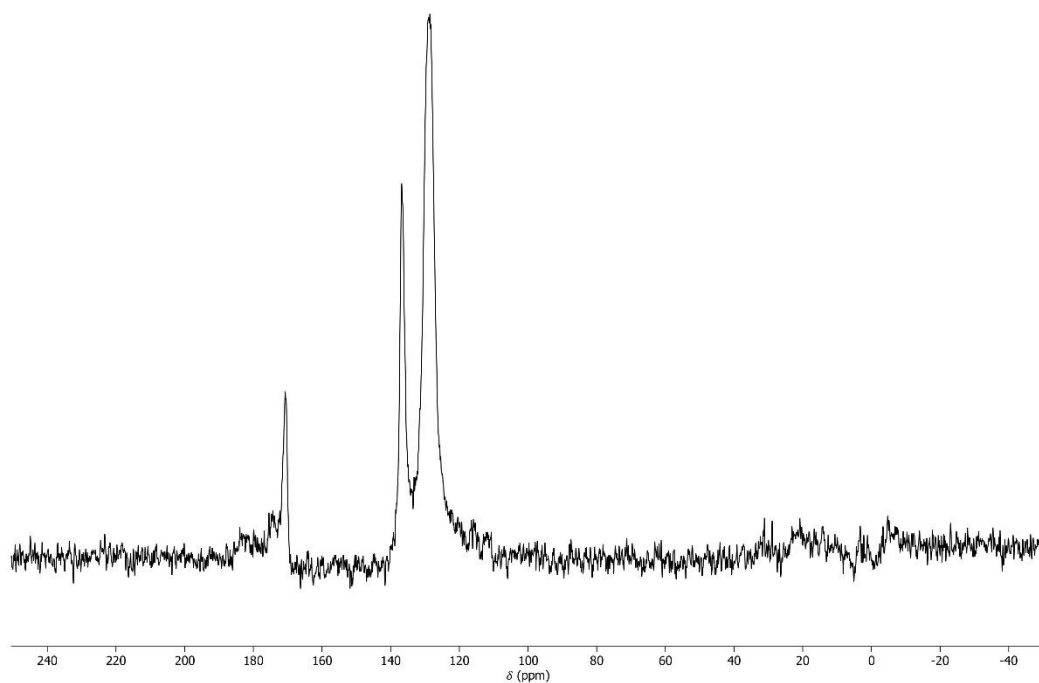

Figure S46. Solid state  $^{13}\text{C}$  NMR spectrum of UiO-66-40-th.

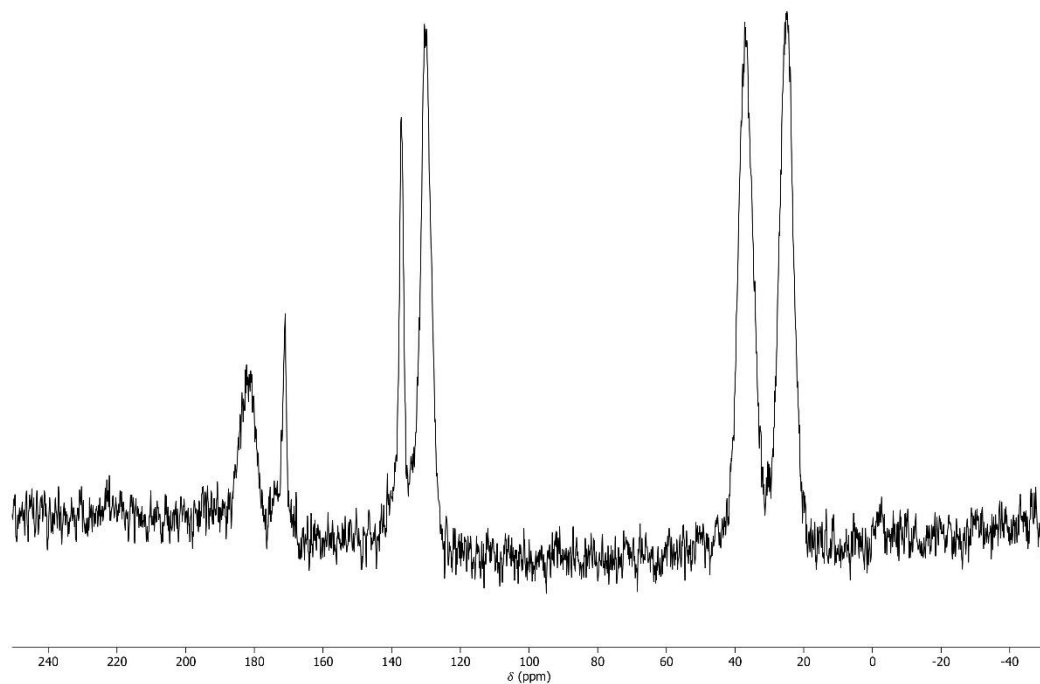

Figure S47. Solid state  $^{13}\text{C}$  NMR spectrum of UiO-66-51.

## 6. Thermogravimetric Analysis

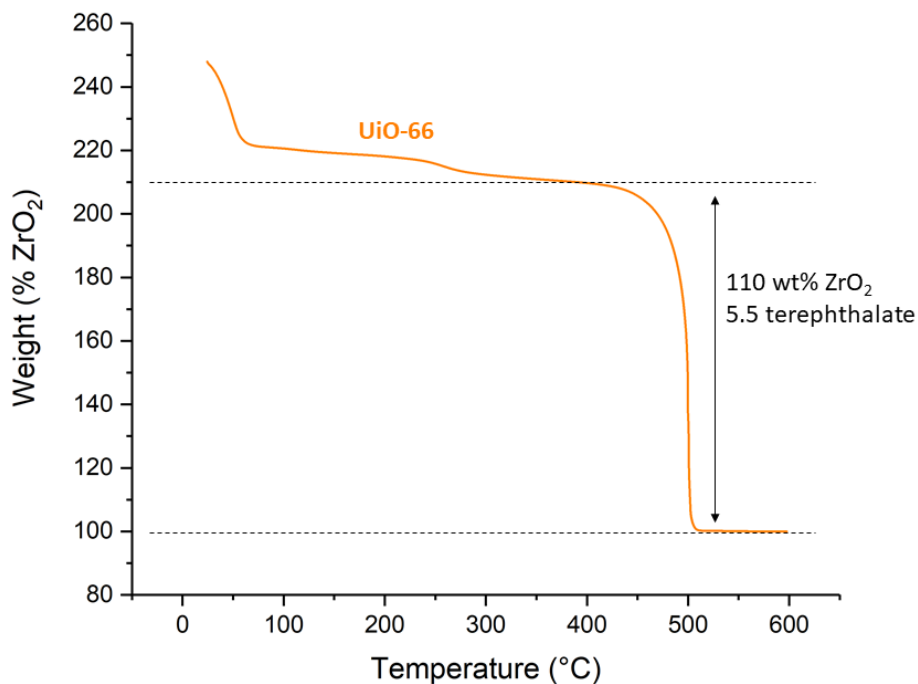

Figure S48. Thermogravimetric plots of UiO-66-0

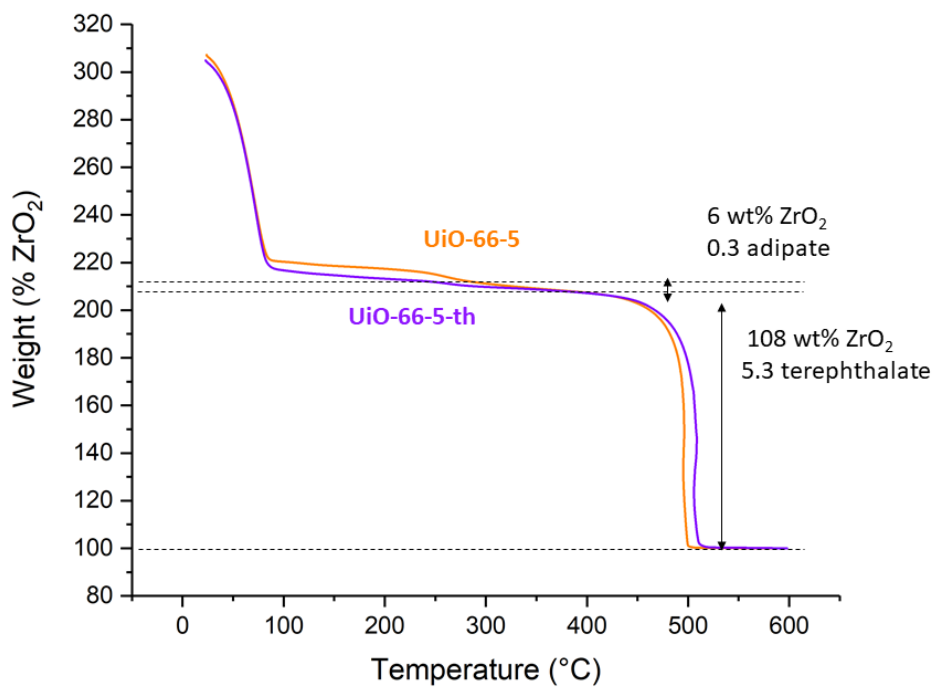

Figure S49. Thermogravimetric plots of UiO-66-5, before (orange) and after (purple) thermolysis.

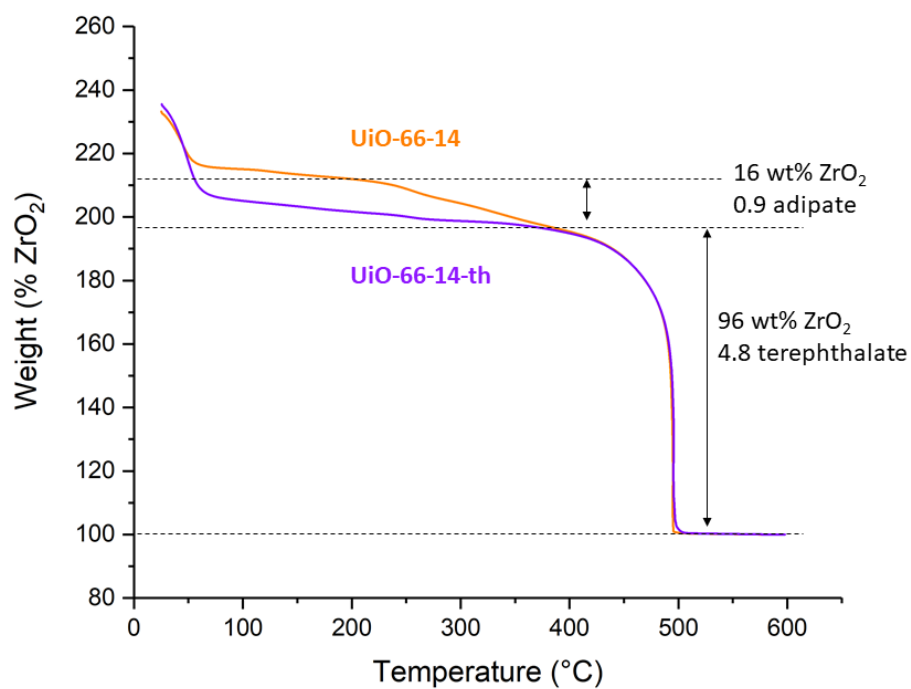

Figure S50. Thermogravimetric plots of UiO-66-14, before (orange) and after (purple) thermolysis.

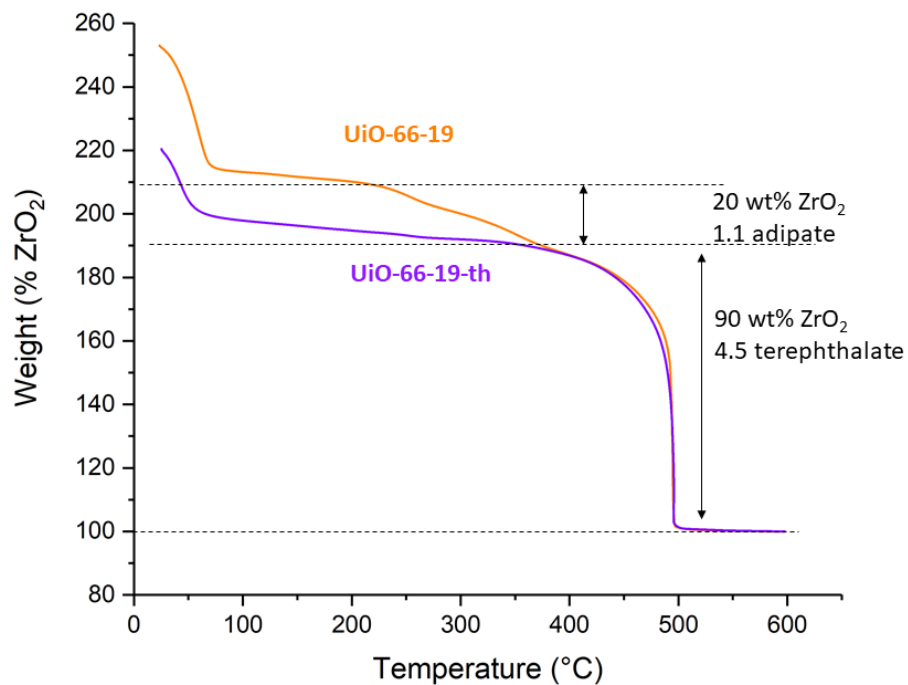

Figure S51. Thermogravimetric plots of UiO-66-19, before (orange) and after (purple) thermolysis.

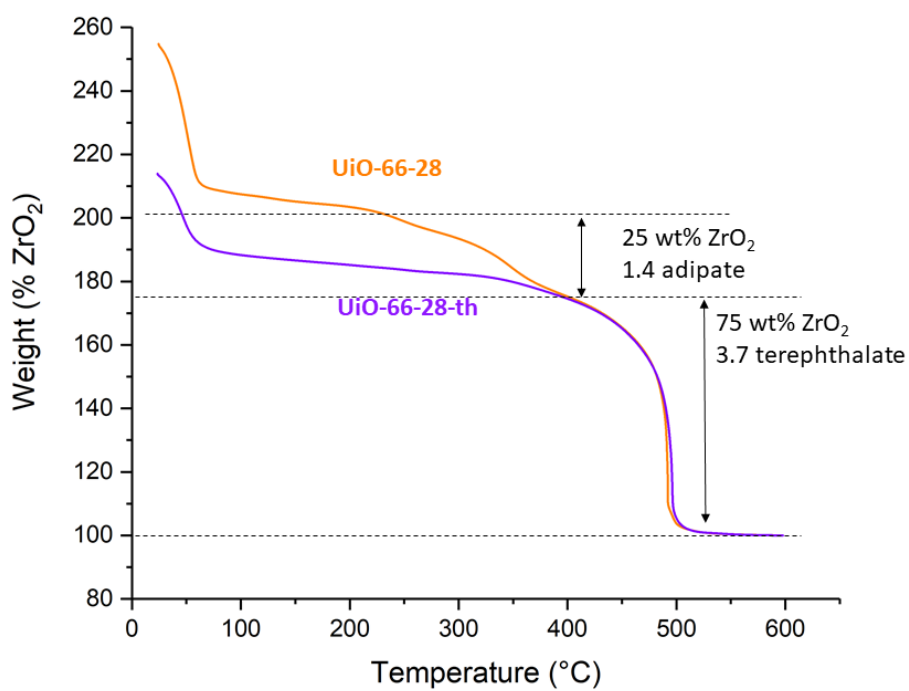

Figure S52. Thermogravimetric plots of UiO-66-28, before (orange) and after (purple) thermolysis.

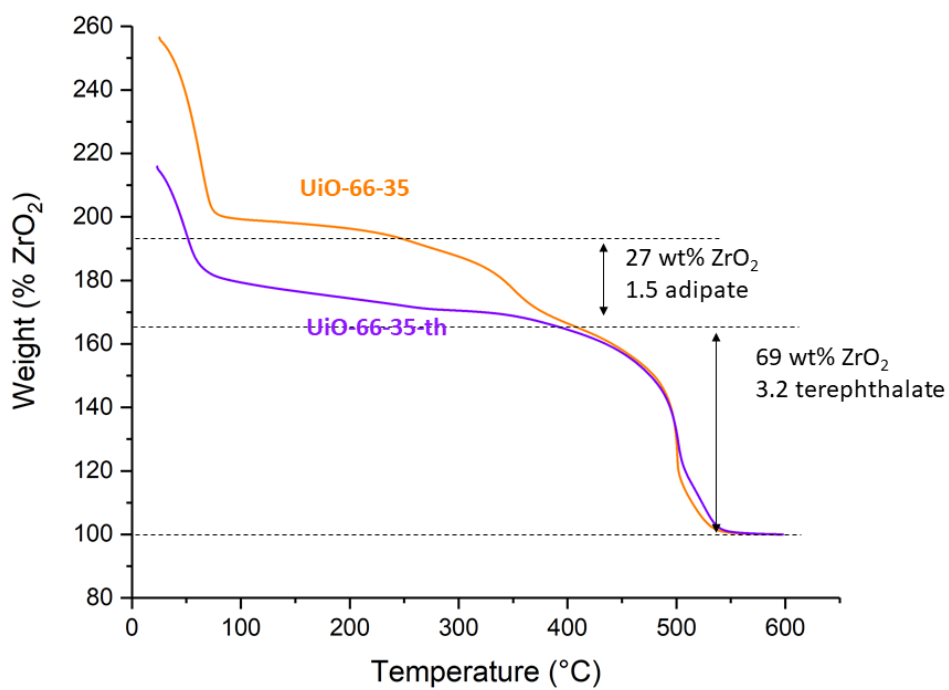

Figure S53. Thermogravimetric plots of UiO-66-35, before (orange) and after (purple) thermolysis.



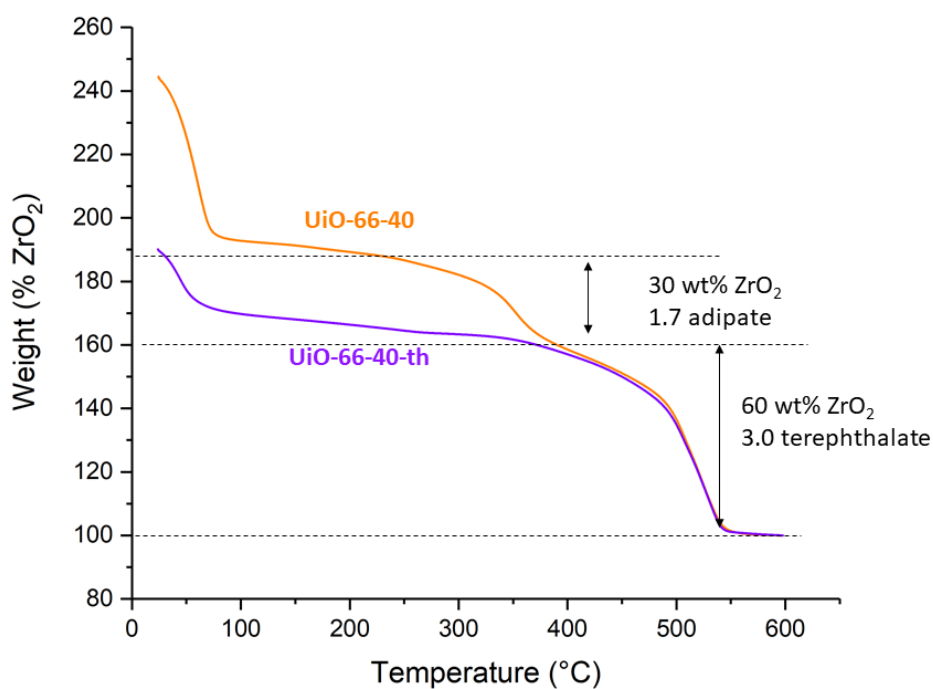

Figure S54. Thermogravimetric plots of UiO-66-40, before (orange) and after (purple) thermolysis.

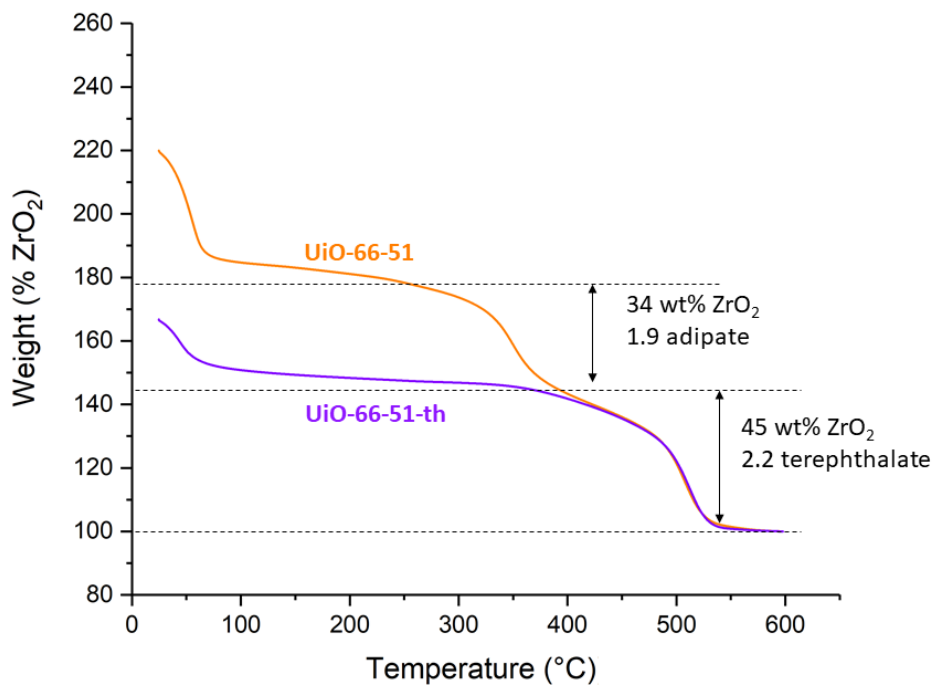

Figure S55. Thermogravimetric plots of UiO-66-51, before (orange) and after (purple) thermolysis.

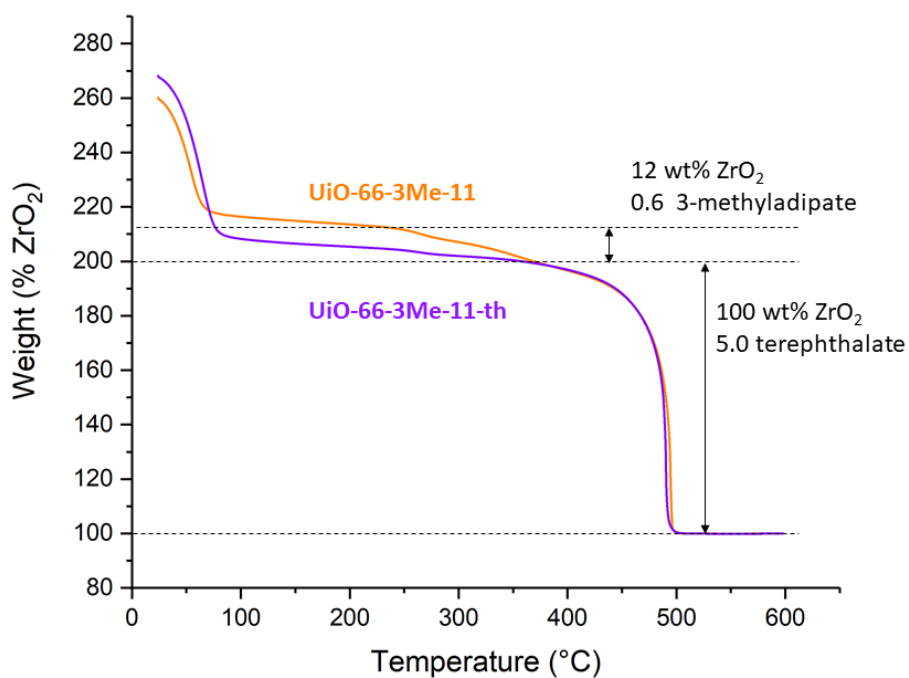

Figure S56. Thermogravimetric plots of UiO-66-3Me-11, before (orange) and after (purple) thermolysis.

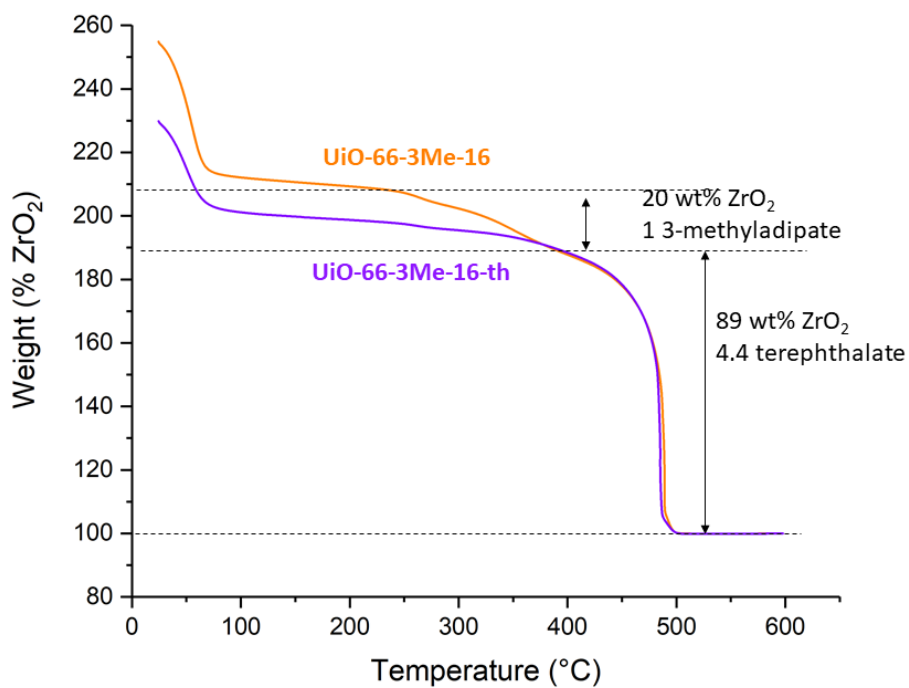

Figure S57. Thermogravimetric plots of UiO-66-3Me-16, before (orange) and after (purple) thermolysis.

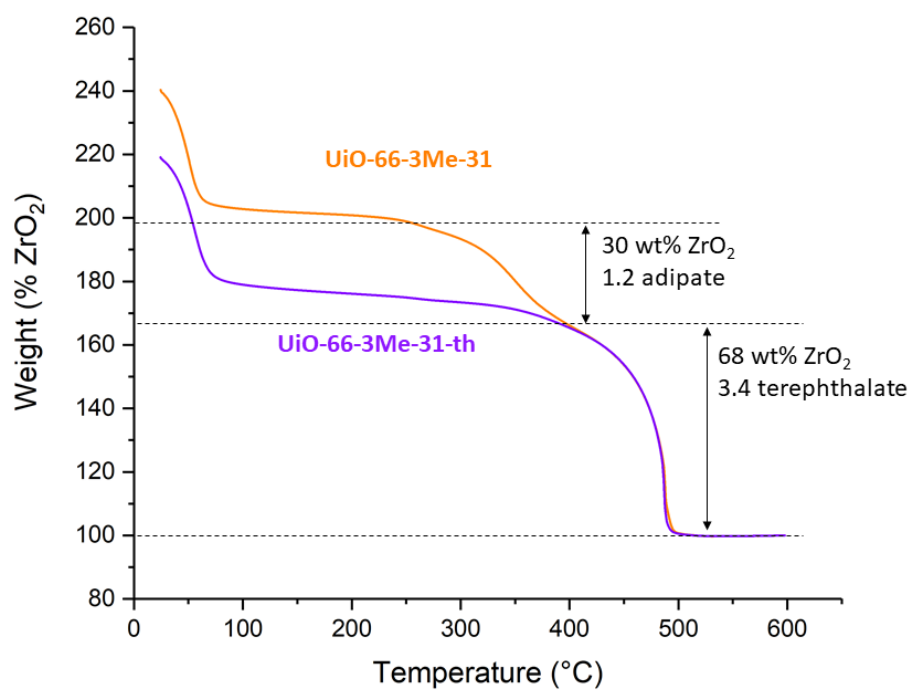

Figure S58. Thermogravimetric plots of UiO-66-3Me-31, before (orange) and after (purple) thermolysis.

## 7. Gas absorption isotherms

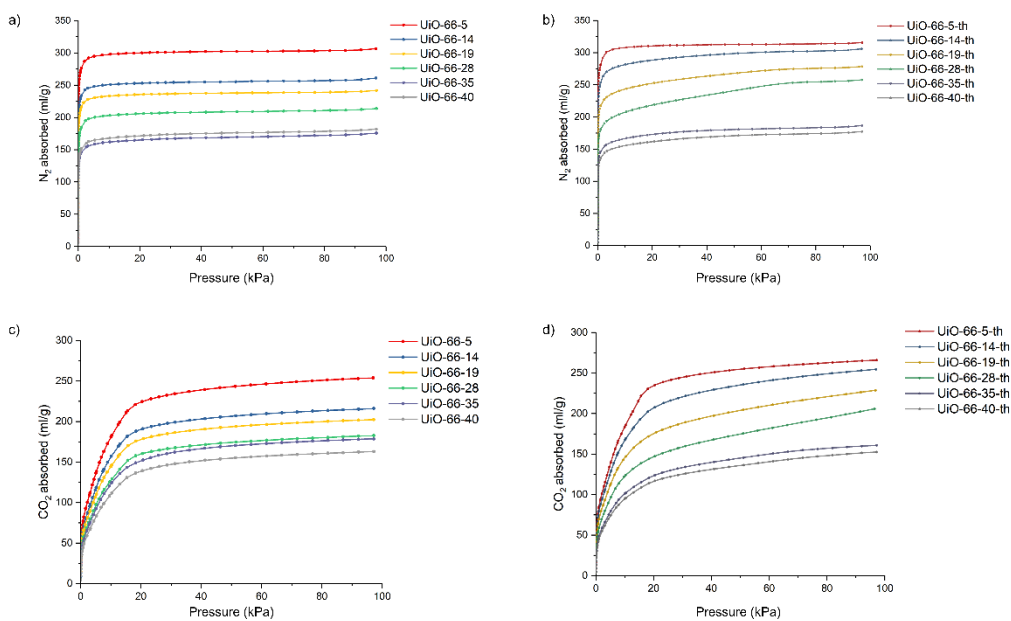

Figure S59:  $N_2$  sorption isotherms of UiO-66-x before (a) and after (b) thermolysis, and  $CO_2$  sorption isotherms of UiO-66-x before (c) and after (d) thermolysis.

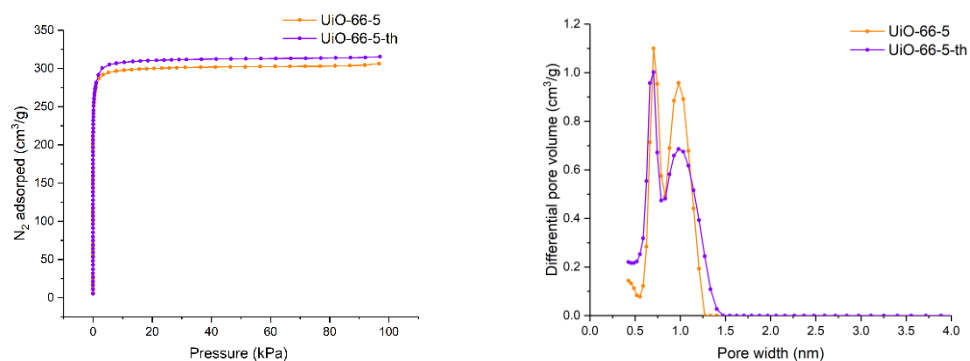

Figure S60: Nitrogen physisorption isotherms (left) and pore size distribution (right, NLDFT model) for UiO-66-5 and UiO-66-5-th.

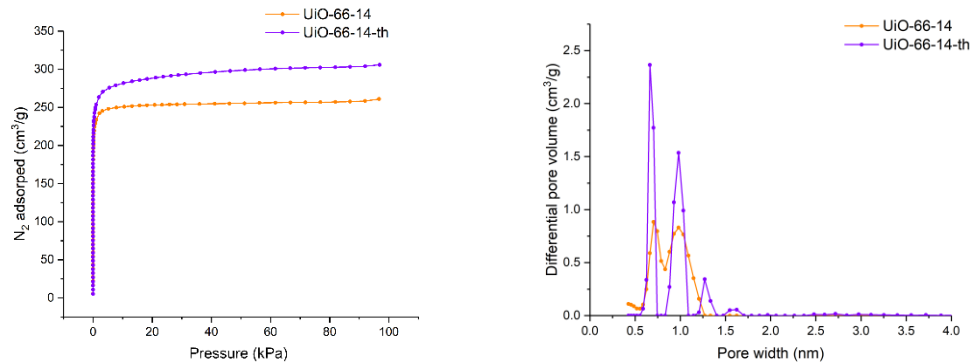

Figure S61: Nitrogen physisorption isotherms (left) and pore size distribution (right, NLDFT model) for UiO-66-14 and UiO-66-14-th.

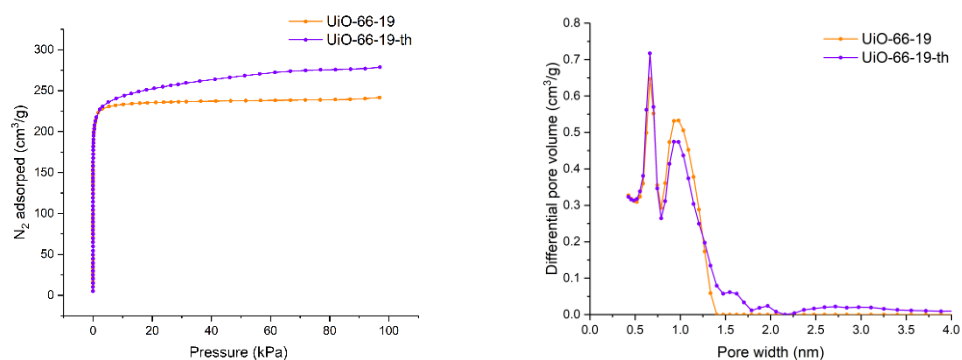

Figure S62: Nitrogen physisorption isotherms (left) and pore size distribution (right, NLDFT model) for UiO-66-19 and UiO-66-19-th.

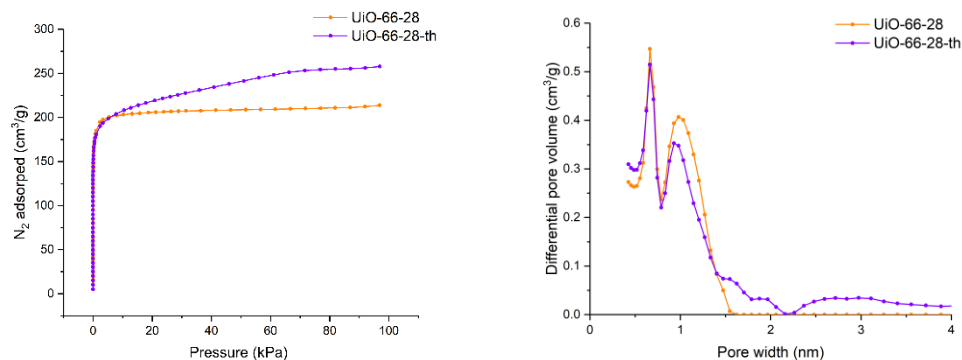

Figure S63: Nitrogen physisorption isotherms (left) and pore size distribution (right, NLDFT model) for UiO-66-28 and UiO-66-28-th.

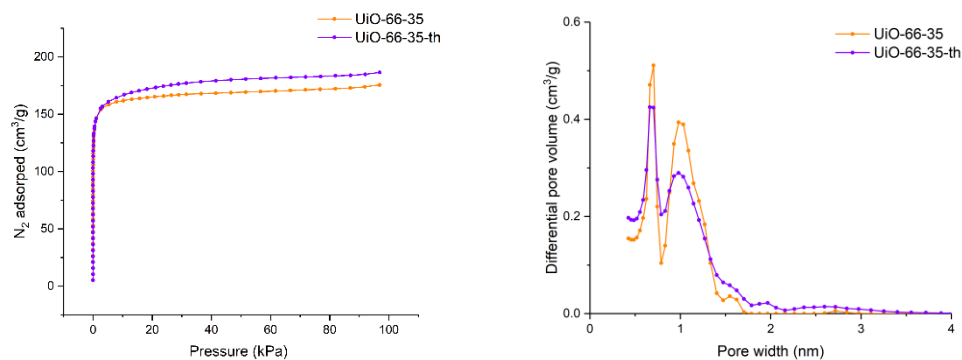

Figure S64: Nitrogen physisorption isotherms (left) and pore size distribution (right, NLDFT model) for UiO-66-35 and UiO-66-35-th.

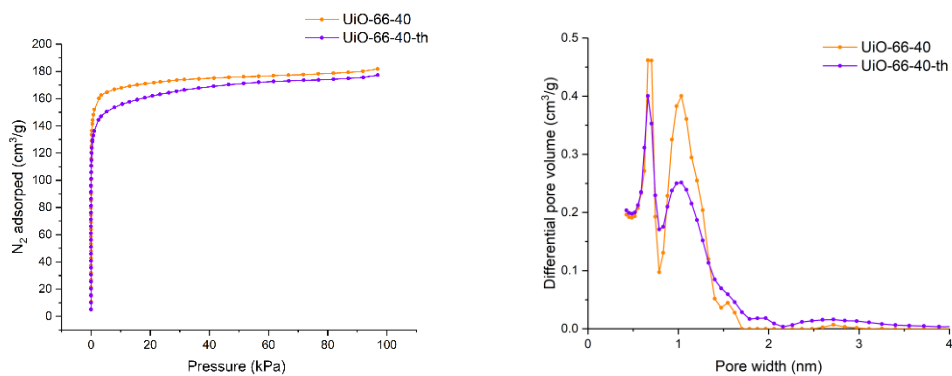

Figure S65: Nitrogen physisorption isotherms (left) and pore size distribution (right, NLDFT model) for UiO-66-40 and UiO-66-40-th.

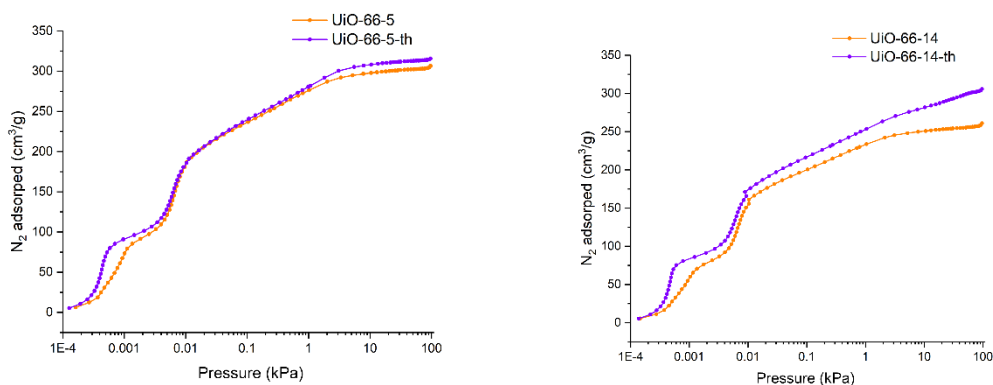

Figure S66: Nitrogen physisorption isotherms of UiO-66-5 (left) and UiO-66-14 (right) plotted on a logarithmic scale for pressure.

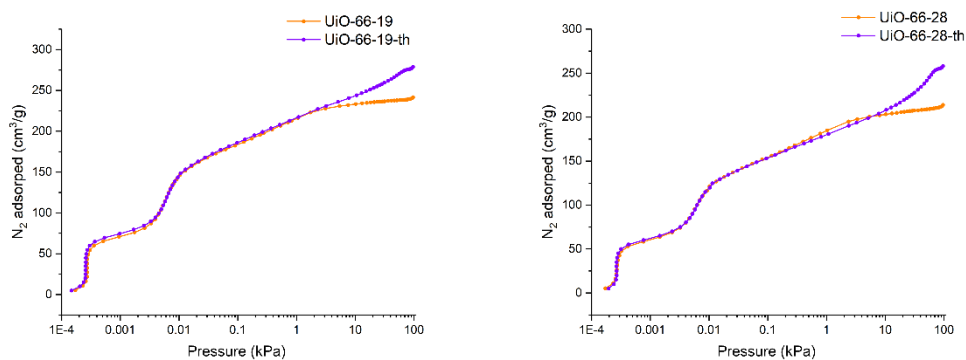

Figure S67: Nitrogen physisorption isotherms of UiO-66-19 (left) and UiO-66-28 (right) plotted on a logarithmic scale for pressure.

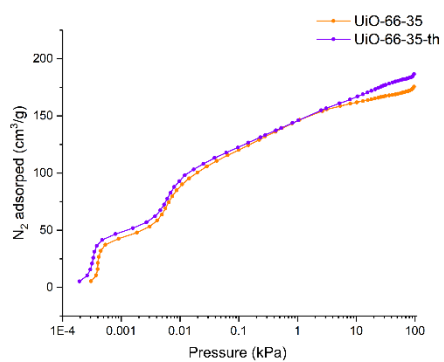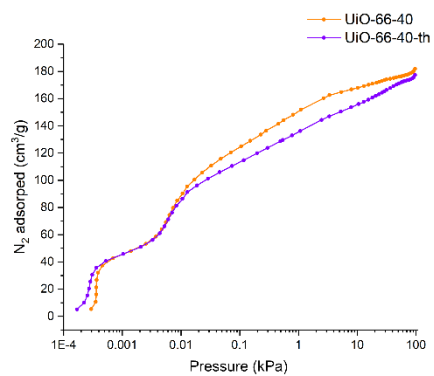

Figure S68: Nitrogen physisorption isotherms of UiO-66-35 (left) and UiO-66-40 (right) plotted on a logarithmic scale for pressure.

## 8. Computational Modeling

### 8.1 Computational details

All calculations were done using ORCA 5.0.3. The geometries of two  $\text{Zr}_6\text{O}_4(\text{OH})_4$  clusters bridged by one terephthalate were extracted from the crystal structure reported by Lillerud and coworkers.<sup>3</sup> The remaining terephthalates surrounding the clusters were truncated to formates, and the geometries were optimized with the coordinates of the formate carbon atoms fixed to replicate the rigidity of the framework. The bridging terephthalate was replaced with an adipate and a conformer search of the adipate was first done using the GFN2-xTB method of Grimme and Bannwarth.<sup>4</sup> The geometries of the conformers found were then reoptimized using the PBE functional<sup>5</sup> with an atom pairwise dispersion correction (D4),<sup>6</sup> together with the def2-SVP basis set<sup>7</sup> and effective core potentials for zirconium.<sup>8</sup> These calculations were performed using RI density fitting approximations with the def2/J Coulomb fitting basis set.<sup>9</sup> Single-point electronic energies were recalculated with the PBE0-D4 functional<sup>10</sup> and the def2-TZVPP basis set.

Three bridging conformers and one folded isomer was optimized, with the bridging conformers labelled herein as Zr\_adipic\_1 to Zr\_adipic\_3 and an isomer where the adipate is folded and does not bridge the two nodes, labelled as Zr\_adipic\_folded. The energies of the 4 structures and their structures are detailed in the following subsection.

### 8.2 Computed energies

Table S6: DFT-calculated gas phase electronic energies.

| Structure         | $E_{\text{el}}$ (PBE-D4/def2-SVP)<br>[kcal/mol] | $E_{\text{el}}$ (PBE0-D4/def2-TZVPP)<br>[kcal/mol] |
|-------------------|-------------------------------------------------|----------------------------------------------------|
| Zr_terephthalate  | -4102012.657                                    | -4106030.681                                       |
| Zr_adipic_1       | -4055766.481                                    | -4059747.101                                       |
| Zr_adipic_2       | -4055756.669                                    | -4059741.286                                       |
| Zr_adipic_3       | -4055761.003                                    | -4059739.572                                       |
| Zr_adipic_folded  | -4055761.264                                    | -4059740.043                                       |
| Terephthalic acid | -381715.2667                                    | -382145.58                                         |
| Adipic acid       | -335470.9947                                    | -335862.2938                                       |

### 8.3 Optimized Structures

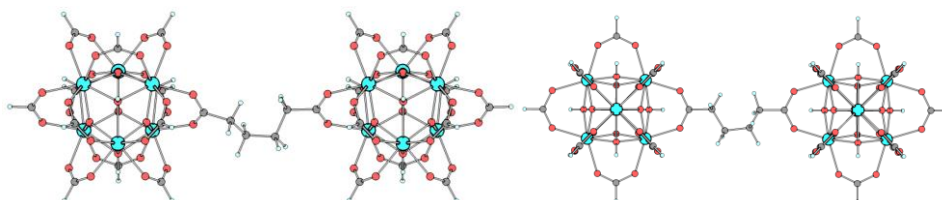

Figure S69: Optimized structure of Zr\_adipic\_1



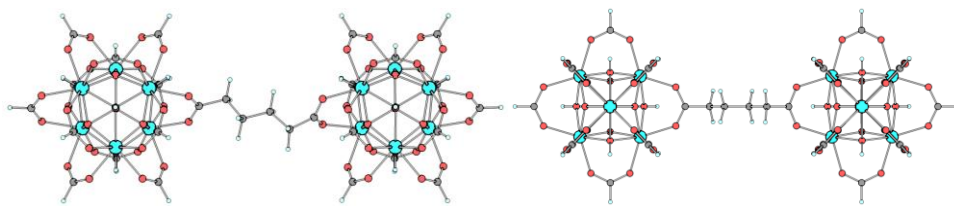

Figure S70: Optimized structure of Zr\_adipic\_2

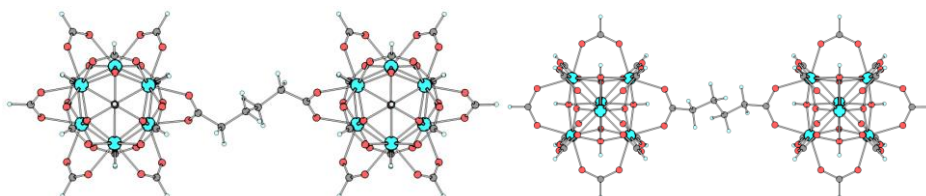

Figure S71: Optimized structure of Zr\_adipic\_3

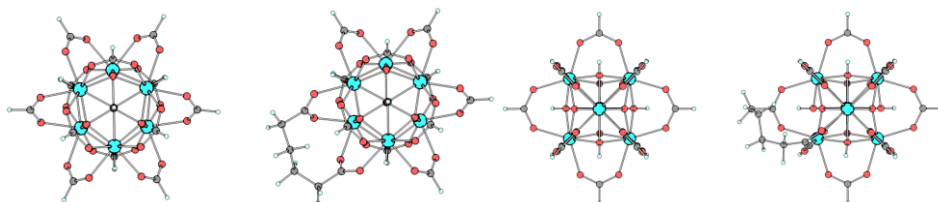

Figure S72: Optimized structure of Zr\_adipic\_folded

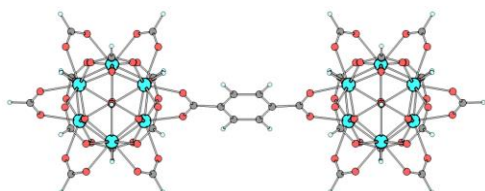

Figure S73: Optimized structure of Zr\_terephthalate

Table S6: xyz coordinates of all computed structures

|                    |          |          |          |                          |          |          |          |
|--------------------|----------|----------|----------|--------------------------|----------|----------|----------|
| <b>adipic_acid</b> |          |          |          | H                        | -0.39356 | -0.30963 | -4.46101 |
| C                  | -1.09982 | -0.8548  | -1.36681 |                          |          |          |          |
| C                  | 0.010502 | 0.009177 | -0.76927 | <b>terephthalic_acid</b> |          |          |          |
| C                  | 0.001848 | 0.000764 | 0.76165  | O                        | 1.097909 | -0.11809 | -2.11017 |
| H                  | -0.09058 | 1.051118 | -1.14184 | O                        | -1.1638  | -0.12297 | -2.14036 |
| H                  | 0.995541 | -0.34339 | -1.14343 | C                        | -0.02925 | -0.12493 | -0.01824 |
| C                  | 1.112106 | 0.864828 | 1.359179 | C                        | 1.207319 | -0.1237  | 0.660414 |
| H                  | 0.102971 | -1.04117 | 1.134229 | H                        | 2.141349 | -0.12049 | 0.082008 |
| H                  | -0.98321 | 0.353286 | 1.135791 | C                        | -0.12029 | -0.12201 | -1.50994 |
| C                  | 1.201189 | 0.93542  | 2.872257 | C                        | -1.23395 | -0.12901 | 0.712959 |
| H                  | 1.033027 | 1.916785 | 1.007729 | H                        | -2.18206 | -0.12992 | 0.155647 |
| H                  | 2.112432 | 0.529003 | 1.008593 | O                        | -1.09861 | -0.13669 | 4.880698 |
| C                  | -1.18905 | -0.9252  | -2.87988 | C                        | 0.028543 | -0.13062 | 2.788769 |
| H                  | -2.10012 | -0.51896 | -1.01617 | C                        | 1.233246 | -0.12657 | 2.057565 |
| H                  | -1.02076 | -1.90679 | -1.0154  | H                        | 2.181355 | -0.12576 | 2.614877 |
| O                  | -2.01669 | -1.56936 | -3.49441 | C                        | 0.119594 | -0.13361 | 4.280466 |
| O                  | -0.23287 | -0.18333 | -3.50019 | O                        | 1.163105 | -0.1332  | 4.910877 |
| O                  | 0.246777 | 0.19128  | 3.492569 | C                        | -1.20802 | -0.13183 | 2.11011  |
| O                  | 2.030047 | 1.578025 | 3.486772 | H                        | -2.14205 | -0.13499 | 2.688517 |
| H                  | 0.408434 | 0.31635  | 4.453394 | H                        | 0.911253 | -0.11647 | -3.07359 |

|                         |          |          |          |                    |          |          |          |
|-------------------------|----------|----------|----------|--------------------|----------|----------|----------|
| H                       | -0.91195 | -0.13857 | 5.844118 | O                  | 0.981028 | 0.975461 | 6.707171 |
|                         |          |          |          | O                  | 0.398479 | -2.40306 | 8.695506 |
|                         |          |          |          | O                  | -2.38258 | 0.40147  | 8.712051 |
| <b>Zr_adipic_folded</b> |          |          |          | O                  | 2.778361 | -2.74133 | 7.579655 |
| C                       | -3.80131 | -0.6522  | 10.94689 | O                  | -0.82655 | 0.782673 | 12.61738 |
| C                       | 3.801313 | 0.652202 | 6.493378 | O                  | 3.504298 | 1.530586 | 10.08392 |
| C                       | -3.80131 | -0.6522  | -8.17661 | O                  | 1.524316 | 3.505799 | 7.360868 |
| C                       | 3.801313 | 0.652202 | -3.7231  | O                  | -0.73344 | -0.74371 | 10.17044 |
| C                       | 0.652202 | 3.801313 | -8.17661 | O                  | -0.7486  | -0.75132 | 7.217104 |
| C                       | -0.6522  | -3.80131 | -3.7231  | O                  | -0.3032  | 1.775907 | 8.704433 |
| C                       | 0.652202 | 3.801313 | 10.94689 | O                  | 1.773833 | -0.31114 | 8.704527 |
| C                       | 0.652202 | 3.801313 | -3.7231  | O                  | -1.54007 | -3.50486 | 10.09003 |
| C                       | 3.801313 | 0.652202 | -8.17661 | O                  | -3.50326 | -1.54306 | 7.340058 |
| C                       | -3.80131 | -0.6522  | -3.7231  | O                  | 2.769182 | -2.74184 | 9.857215 |
| C                       | -0.6522  | -3.80131 | -8.17661 | O                  | -0.40057 | 3.163072 | 6.18981  |
| C                       | -3.14911 | 3.149111 | -5.94986 | O                  | -3.16722 | 0.399863 | 6.194399 |
| C                       | -3.14911 | 3.149111 | 8.720136 | O                  | 0.379196 | -3.14204 | 11.26422 |
| C                       | -9.2E-09 | 1.36E-08 | -10.4034 | O                  | 3.175286 | -0.41391 | 11.22229 |
| C                       | 3.149111 | -3.14911 | -5.94985 | O                  | 0.790307 | -0.82013 | 12.61932 |
| C                       | 3.149111 | -3.14911 | 8.720136 | H                  | 3.914266 | -3.96762 | -5.94993 |
| C                       | 0.652202 | 3.801313 | 6.493378 | H                  | -0.79914 | -4.77392 | -8.71323 |
| C                       | 1.18E-09 | -5.9E-11 | 13.17365 | H                  | -0.80726 | -4.77205 | -3.18462 |
| C                       | -3.80131 | -0.6522  | 6.493378 | H                  | -4.77195 | -0.80748 | -3.18457 |
| C                       | -0.6522  | -3.80131 | 10.94689 | H                  | 4.750772 | 0.827124 | -3.15451 |
| C                       | 3.801313 | 0.652202 | 10.94689 | H                  | 0.827274 | 4.750905 | -3.15482 |
| Zr                      | -1.76915 | -1.78623 | 8.701987 | H                  | -3.96772 | 3.914141 | -5.94976 |
| Zr                      | -1.24799 | 1.244274 | 10.47864 | H                  | 0.836213 | 4.739663 | -8.76063 |
| Zr                      | 1.768289 | 1.764573 | 8.709065 | H                  | 4.739808 | 0.836083 | -8.76043 |
| Zr                      | 1.24878  | -1.25712 | 6.930127 | H                  | 0.026108 | 0.026102 | -11.5232 |
| Zr                      | -1.24866 | 1.251143 | -7.71324 | H                  | -4.77396 | -0.79912 | -8.71317 |
| Zr                      | -1.77118 | -1.77119 | -5.94941 | H                  | 0.834165 | 4.74067  | 11.53004 |
| Zr                      | 1.246631 | -1.25161 | -4.16686 | H                  | -3.96624 | 3.915835 | 8.722652 |
| Zr                      | 1.767347 | 1.767448 | -5.94171 | H                  | -4.77681 | -0.79705 | 11.479   |
| Zr                      | -1.25149 | 1.246448 | -4.16682 | H                  | 0.028254 | 0.030218 | 14.29339 |
| Zr                      | 1.251019 | -1.24852 | -7.71353 | H                  | 0.828733 | 4.750287 | 5.924292 |
| Zr                      | -1.24639 | 1.245337 | 6.932315 | H                  | 4.745677 | 0.834901 | 5.918399 |
| Zr                      | 1.248206 | -1.25599 | 10.47686 | H                  | -4.75728 | -0.81874 | 5.931166 |
| O                       | -3.15344 | 0.3927   | 11.25099 | H                  | -0.80615 | -4.76671 | 11.49437 |
| O                       | -3.47746 | -1.55944 | 10.12386 | H                  | 3.915768 | -3.96632 | 8.723533 |
| O                       | 3.170627 | -0.40637 | 6.197022 | H                  | 4.738292 | 0.836981 | 11.53301 |
| O                       | 3.505445 | 1.524814 | 7.360568 | H                  | -3.34846 | 0.576276 | -5.9444  |
| O                       | -3.48591 | -1.55388 | -7.34487 | H                  | 1.390462 | 1.39057  | -8.71745 |
| O                       | -3.15044 | 0.389343 | -8.4846  | H                  | 0.576641 | -3.34827 | -5.94477 |
| O                       | 3.503783 | 1.527831 | -4.58669 | H                  | 1.359471 | 1.358995 | -3.12093 |
| O                       | 3.163967 | -0.402   | -3.42342 | H                  | -3.341   | 0.564742 | 8.707136 |
| O                       | -0.41375 | 3.175866 | -8.4536  | H                  | 1.322568 | 1.312785 | 5.860654 |
| O                       | 1.531019 | 3.503247 | -7.3147  | H                  | 0.530442 | -3.36257 | 8.600792 |
| O                       | 0.401121 | -3.16732 | -3.42375 | H                  | 1.387995 | 1.382485 | 11.48511 |
| O                       | -1.55695 | -3.47769 | -4.54728 | C                  | -0.16091 | -0.16156 | -1.46584 |
| O                       | 1.532362 | 3.502485 | 10.08627 | O                  | 0.709799 | -0.89968 | -2.01747 |
| O                       | -0.41295 | 3.173628 | 11.22308 | O                  | -0.90013 | 0.706362 | -2.01964 |
| O                       | 1.527451 | 3.503849 | -4.58719 | C                  | -0.91726 | -0.92908 | 3.032474 |
| O                       | 0.989865 | 0.990009 | -7.92729 | C                  | -1.74947 | -2.17611 | 3.438064 |
| O                       | -0.40157 | 3.163609 | -3.42275 | C                  | -0.92722 | -3.4698  | 3.656623 |
| O                       | 3.503318 | 1.530989 | -7.31462 | H                  | -2.51936 | -2.34566 | 2.657591 |
| O                       | 0.979685 | 0.979376 | -3.93202 | H                  | -2.32431 | -1.92303 | 4.355263 |
| O                       | 3.175648 | -0.41355 | -8.45379 | C                  | -1.31092 | -4.26354 | 4.919536 |
| O                       | -2.39075 | 0.408816 | -5.94521 | H                  | 0.149943 | -3.22128 | 3.737581 |
| O                       | 0.409022 | -2.39058 | -5.94549 | H                  | -1.0315  | -4.12965 | 2.771124 |
| O                       | -2.73579 | 2.778091 | -4.81146 | C                  | -0.82752 | -3.56292 | 6.180503 |
| O                       | 0.788387 | -0.82197 | -9.84907 | H                  | -0.8155  | -5.25823 | 4.89111  |
| O                       | 2.770558 | -2.74349 | -7.08831 | H                  | -2.40136 | -4.4405  | 4.999868 |
| O                       | -3.16775 | 0.401488 | -3.42454 | C                  | -0.30965 | -0.31965 | 4.281207 |
| O                       | 0.389244 | -3.15033 | -8.4846  | H                  | -1.57049 | -0.17282 | 2.557594 |
| O                       | -0.73398 | -0.73414 | -7.41477 | H                  | -0.11823 | -1.21836 | 2.319144 |
| O                       | -0.73746 | -0.73813 | -4.47486 | O                  | -0.91448 | 0.674214 | 4.805781 |
| O                       | 1.77854  | -0.30458 | -5.93718 | O                  | 0.711648 | -0.89351 | 4.786888 |
| O                       | -0.30448 | 1.778737 | -5.93733 | O                  | 0.375936 | -3.13606 | 6.159658 |
| O                       | -3.47729 | -1.55743 | -4.54686 | O                  | -1.62569 | -3.41663 | 7.161708 |
| O                       | -1.55381 | -3.48602 | -7.34472 | H                  | -0.28764 | -0.28869 | -0.35922 |
| O                       | -2.74383 | 2.770399 | -7.08842 |                    |          |          |          |
| O                       | -2.73824 | 2.77535  | 7.580846 |                    |          |          |          |
| O                       | -2.74215 | 2.767907 | 9.857392 | <b>Zr_adipic_1</b> |          |          |          |
| O                       | 2.777742 | -2.73625 | -4.81141 | C                  | -3.80131 | -0.6522  | 10.94689 |
| O                       | -0.82208 | 0.788288 | -9.84911 | C                  | 3.801313 | 0.652202 | 6.493378 |
| O                       | 0.987903 | 0.984402 | 10.69349 | C                  | -3.80131 | -0.6522  | -8.17661 |

|    |          |          |          |                    |          |          |          |
|----|----------|----------|----------|--------------------|----------|----------|----------|
| C  | 3.801313 | 0.652202 | -3.7231  | O                  | 2.778633 | -2.73796 | 7.581214 |
| C  | 0.652202 | 3.801313 | -8.17661 | O                  | -0.82347 | 0.787284 | 12.62069 |
| C  | -0.6522  | -3.80131 | -3.7231  | O                  | 3.503642 | 1.53305  | 10.0872  |
| C  | 0.652202 | 3.801313 | 10.94689 | O                  | 1.529248 | 3.506767 | 7.357542 |
| C  | -0.6522  | -3.80131 | 6.493378 | O                  | -0.73407 | -0.73399 | 10.18982 |
| C  | 0.652202 | 3.801313 | -3.7231  | O                  | -0.73764 | -0.73732 | 7.261418 |
| C  | 3.801313 | 0.652202 | -8.17661 | O                  | -0.30362 | 1.784747 | 8.718611 |
| C  | -3.80131 | -0.6522  | -3.7231  | O                  | 1.78556  | -0.30365 | 8.719404 |
| C  | -0.6522  | -3.80131 | -8.17661 | O                  | -1.55541 | -3.48496 | 10.11751 |
| C  | -3.14911 | 3.149111 | -5.94986 | O                  | -3.47959 | -1.55679 | 7.319385 |
| C  | -3.14911 | 3.149111 | 8.720136 | O                  | 2.770331 | -2.7444  | 9.858927 |
| C  | 4.67E-09 | -2.3E-08 | -10.4034 | O                  | -0.40529 | 3.167528 | 6.201277 |
| C  | 3.149111 | -3.14911 | -5.94986 | O                  | -3.16672 | 0.400658 | 6.19513  |
| C  | 3.149111 | -3.14911 | 8.720136 | O                  | 0.38855  | -3.15101 | 11.2583  |
| C  | 0.652202 | 3.801313 | 6.493378 | O                  | 3.175653 | -0.41271 | 11.22689 |
| C  | 1.33E-08 | -3E-08   | 13.17365 | O                  | 0.788095 | -0.82336 | 12.62159 |
| C  | -3.80131 | -0.6522  | 6.493378 | H                  | 3.91278  | -3.96922 | -5.95048 |
| C  | -0.6522  | -3.80131 | 10.94689 | H                  | -0.79769 | -4.77631 | -8.70963 |
| C  | 3.801313 | 0.652202 | 10.94689 | H                  | -0.81614 | -4.76633 | -3.17629 |
| Zr | -1.77293 | -1.77244 | 8.722708 | H                  | -4.76491 | -8.1839  | -3.17448 |
| Zr | -1.24858 | 1.251023 | 10.48791 | H                  | 4.747698 | 0.829103 | -3.14958 |
| Zr | 1.769013 | 1.769512 | 8.717284 | H                  | 0.830842 | 4.746169 | -3.14762 |
| Zr | 1.24619  | -1.25153 | 6.95345  | H                  | -3.96985 | 3.912127 | -5.95109 |
| Zr | -1.24789 | 1.251433 | -7.71831 | H                  | 0.833943 | 4.741718 | -8.75837 |
| Zr | -1.77221 | -1.77173 | -5.95195 | H                  | 4.741863 | 0.834222 | -8.75804 |
| Zr | 1.248087 | -1.24929 | -4.18317 | H                  | 0.02713  | 0.027498 | -11.5233 |
| Zr | 1.770001 | 1.770676 | -5.94451 | H                  | -4.77611 | -0.79775 | -8.71002 |
| Zr | -1.25154 | 1.249776 | -4.18231 | H                  | 0.834302 | 4.741684 | 11.52861 |
| Zr | 1.250789 | -1.24763 | -7.71821 | H                  | -3.96658 | 3.915619 | 8.720792 |
| Zr | -1.25114 | 1.245906 | 6.950312 | H                  | -4.77633 | -0.79752 | 11.47998 |
| Zr | 1.250464 | -1.24815 | 10.48844 | H                  | 0.027489 | 0.028146 | 14.2936  |
| O  | -3.15109 | 0.388746 | 11.25768 | H                  | 0.830733 | 4.746247 | 5.917821 |
| O  | -3.4853  | -1.55562 | 10.11763 | H                  | 4.746681 | 0.831365 | 5.918633 |
| O  | 3.167257 | -0.40463 | 6.198758 | H                  | -4.77089 | -0.80836 | 5.952915 |
| O  | 3.506997 | 1.527898 | 7.358787 | H                  | -0.81106 | -4.76966 | 5.95138  |
| O  | -3.48635 | -1.55445 | -7.34546 | H                  | -0.79753 | -4.7766  | 11.47948 |
| O  | -3.15004 | 0.38769  | -8.48864 | H                  | 3.915243 | -3.96696 | 8.720929 |
| O  | 3.509253 | 1.525826 | -4.59067 | H                  | 4.742254 | 0.833913 | 11.52782 |
| O  | 3.162927 | -0.40158 | -3.42382 | H                  | -3.34903 | 0.578903 | -5.95029 |
| O  | -0.41313 | 3.175843 | -8.45564 | H                  | 1.393036 | 1.391797 | -8.72215 |
| O  | 1.533234 | 3.50394  | -7.31708 | H                  | 0.5791   | -3.34822 | -5.94988 |
| O  | 0.409509 | -3.17779 | -3.43515 | H                  | 1.336702 | 1.337734 | -3.11777 |
| O  | -1.55809 | -3.47576 | -4.54615 | H                  | -3.35114 | 0.578193 | 8.721847 |
| O  | 1.532178 | 3.504581 | 10.08601 | H                  | 1.365056 | 1.364699 | 5.91578  |
| O  | -0.41236 | 3.17524  | 11.22717 | H                  | 0.577606 | -3.35062 | 8.722751 |
| O  | -1.55685 | -3.47807 | 7.318648 | H                  | 1.391227 | 1.391471 | 11.49365 |
| O  | 0.403264 | -3.17005 | 6.19741  | O                  | 0.680022 | -0.91138 | -2.07751 |
| O  | 1.526695 | 3.50861  | -4.5901  | O                  | -0.91983 | 0.68847  | -2.08313 |
| O  | 0.991109 | 0.990839 | -7.93291 | C                  | -0.27556 | -0.26654 | -1.53667 |
| O  | -0.40346 | 3.165374 | -3.42746 | O                  | -0.87536 | 0.722853 | 4.840734 |
| O  | 3.503638 | 1.532896 | -7.31679 | C                  | -0.09736 | -0.10319 | 4.261982 |
| O  | 0.981883 | 0.982698 | -3.95095 | O                  | 0.722011 | -0.88144 | 4.849884 |
| O  | 3.175901 | -0.41306 | -8.45616 | C                  | -0.69694 | -0.66114 | -0.14552 |
| O  | -2.39175 | 0.409575 | -5.95308 | H                  | -1.00732 | 0.271424 | 0.364791 |
| O  | 0.409449 | -2.39099 | -5.95242 | H                  | -1.63615 | -1.24898 | -0.26205 |
| O  | -2.73398 | 2.783526 | -4.81117 | C                  | 0.348523 | -1.4469  | 0.644359 |
| O  | 0.788047 | -0.8233  | -9.85114 | H                  | 0.456213 | -2.46372 | 0.215692 |
| O  | 2.769667 | -2.74498 | -7.08867 | H                  | 1.340267 | -0.963   | 0.508255 |
| O  | -3.18175 | 0.412384 | -3.4399  | C                  | 0.02837  | -1.51714 | 2.13738  |
| O  | 0.388172 | -3.15045 | -8.48818 | H                  | -0.91134 | -2.08703 | 2.309956 |
| O  | -0.73331 | -0.7335  | -7.41929 | H                  | 0.83023  | -2.06669 | 2.669882 |
| O  | -0.73979 | -0.73948 | -4.48574 | C                  | -0.10588 | -0.12211 | 2.754815 |
| O  | 1.785515 | -0.30215 | -5.94781 | H                  | 0.763977 | 0.501238 | 2.440996 |
| O  | -0.30173 | 1.785291 | -5.94853 | H                  | -1.01321 | 0.41426  | 2.420121 |
| O  | -3.47369 | -1.55961 | -4.54434 |                    |          |          |          |
| O  | -1.55478 | -3.48542 | -7.34622 | <b>Zr_adipic_2</b> |          |          |          |
| O  | -2.74509 | 2.769128 | -7.08863 | C                  | -3.80131 | -0.6522  | 10.94689 |
| O  | -2.73897 | 2.777124 | 7.581348 | C                  | 3.801313 | 0.652202 | 6.493378 |
| O  | -2.74363 | 2.771255 | 9.859044 | C                  | -3.80131 | -0.6522  | -8.17661 |
| O  | 2.781905 | -2.7343  | -4.81122 | C                  | 3.801313 | 0.652202 | -3.7231  |
| O  | -0.82295 | 0.787934 | -9.85062 | C                  | 0.652202 | 3.801313 | -8.17661 |
| O  | 0.990539 | 0.99069  | 10.7037  | C                  | -0.6522  | -3.80131 | -3.7231  |
| O  | 0.98491  | 0.984568 | 6.725966 | C                  | 0.652202 | 3.801313 | 10.94689 |
| O  | 0.408567 | -2.39328 | 8.722931 | C                  | -0.6522  | -3.80131 | 6.493378 |
| O  | -2.39386 | 0.408792 | 8.722146 | C                  | 0.652202 | 3.801313 | -3.7231  |

|    |          |          |          |                    |          |          |          |
|----|----------|----------|----------|--------------------|----------|----------|----------|
| C  | 3.801313 | 0.652202 | -8.17661 | O                  | -0.2986  | 1.791457 | 8.733624 |
| C  | -3.80131 | -0.6522  | -3.7231  | O                  | 1.791574 | -0.29879 | 8.733692 |
| C  | -0.6522  | -3.80131 | -8.17661 | O                  | -1.55413 | -3.4873  | 10.11566 |
| C  | -3.14911 | 3.149111 | -5.94986 | O                  | -3.46782 | -1.56142 | 7.311149 |
| C  | -3.14911 | 3.149111 | 8.720136 | O                  | 2.768633 | -2.74699 | 9.859159 |
| C  | -1.1E-08 | 1.66E-08 | -10.4034 | O                  | -0.40072 | 3.160253 | 6.196905 |
| C  | 3.149111 | -3.14911 | -5.94986 | O                  | -3.20572 | 0.432546 | 6.242385 |
| C  | 3.149111 | -3.14911 | 8.720136 | O                  | 0.384388 | -3.14853 | 11.26536 |
| C  | 0.652202 | 3.801313 | 6.493378 | O                  | 3.176172 | -0.41202 | 11.22934 |
| C  | -1.8E-08 | 5.57E-09 | 13.17365 | O                  | 0.789038 | -0.82254 | 12.62343 |
| C  | -3.80131 | -0.6522  | 6.493378 | H                  | 3.917743 | -3.96469 | -5.95059 |
| C  | -0.6522  | -3.80131 | 10.94689 | H                  | -0.79638 | -4.77852 | -8.70626 |
| C  | 3.801313 | 0.652202 | 10.94689 | H                  | -0.80986 | -4.76833 | -3.17873 |
| Zr | -1.77376 | -1.77389 | 8.728098 | H                  | -4.76837 | -0.80978 | -3.17879 |
| Zr | -1.24782 | 1.250809 | 10.49749 | H                  | 4.739683 | 0.836025 | -3.13815 |
| Zr | 1.773944 | 1.773873 | 8.719666 | H                  | 0.835752 | 4.740059 | -3.13867 |
| Zr | 1.254892 | -1.25418 | 6.981457 | H                  | -3.96428 | 3.918168 | -5.9506  |
| Zr | -1.24973 | 1.25016  | -7.72571 | H                  | 0.832079 | 4.745261 | -8.75346 |
| Zr | -1.77368 | -1.77372 | -5.95768 | H                  | 4.744767 | 0.832494 | -8.75414 |
| Zr | 1.248956 | -1.25666 | -4.20475 | H                  | 0.027539 | 0.027454 | -11.5235 |
| Zr | 1.769923 | 1.769852 | -5.95919 | H                  | -4.7785  | -0.79646 | -8.70629 |
| Zr | -1.25676 | 1.248946 | -4.20431 | H                  | 0.832236 | 4.744601 | 11.52469 |
| Zr | 1.250223 | -1.24972 | -7.72566 | H                  | -3.97472 | 3.906879 | 8.720728 |
| Zr | -1.25413 | 1.254872 | 6.981129 | H                  | -4.77886 | -0.79563 | 11.47605 |
| Zr | 1.250856 | -1.24777 | 10.49739 | H                  | 0.025569 | 0.025519 | 14.29381 |
| O  | -3.14864 | 0.384527 | 11.26524 | H                  | 0.830199 | 4.744315 | 5.914774 |
| O  | -3.48708 | -1.55415 | 10.11582 | H                  | 4.743802 | 0.830699 | 5.914085 |
| O  | 3.160589 | -0.40103 | 6.197446 | H                  | -4.7488  | -0.83628 | 5.92266  |
| O  | 3.513176 | 1.524158 | 7.364294 | H                  | -0.83652 | -4.7486  | 5.922381 |
| O  | -3.48454 | -1.55636 | -7.34927 | H                  | -0.79563 | -4.77886 | 11.47605 |
| O  | -3.15192 | 0.387781 | -8.49119 | H                  | 3.90656  | -3.97503 | 8.720741 |
| O  | 3.504624 | 1.534518 | -4.58255 | H                  | 4.744162 | 0.832611 | 11.5253  |
| O  | 3.176717 | -0.41385 | -3.44854 | H                  | -3.35785 | 0.577417 | -5.96362 |
| O  | -0.40952 | 3.174035 | -8.46284 | H                  | 1.389225 | 1.390307 | -8.73566 |
| O  | 1.532595 | 3.505188 | -7.31643 | H                  | 0.577025 | -3.35781 | -5.96319 |
| O  | 0.400728 | -3.16521 | -3.42825 | H                  | 1.417318 | 1.417483 | -3.22604 |
| O  | -1.55536 | -3.48074 | -4.55145 | H                  | -3.3509  | 0.582399 | 8.727334 |
| O  | 1.534421 | 3.503673 | 10.08909 | H                  | 1.323449 | 1.323728 | 5.893671 |
| O  | -0.41173 | 3.175864 | 11.22983 | H                  | 0.582153 | -3.35083 | 8.727095 |
| O  | -1.56141 | -3.468   | 7.311291 | H                  | 1.393302 | 1.393891 | 11.50108 |
| O  | 0.432629 | -3.20586 | 6.242542 | O                  | 0.762233 | -0.84141 | -2.12846 |
| O  | 1.534554 | 3.504363 | -4.58238 | O                  | -0.84101 | 0.762291 | -2.12825 |
| O  | 0.991544 | 0.991475 | -7.94324 | C                  | 0.097367 | 0.097037 | -1.58519 |
| O  | -0.41371 | 3.176595 | -3.44813 | O                  | -0.96425 | 0.634558 | 4.917481 |
| O  | 3.505427 | 1.532501 | -7.31624 | C                  | -0.42242 | -0.4225  | 4.460431 |
| O  | 0.992209 | 0.991959 | -3.98949 | O                  | 0.6345   | -0.9643  | 4.917648 |
| O  | 3.174331 | -0.40983 | -8.46232 | C                  | 0.405956 | 0.405371 | -0.16179 |
| O  | -2.40039 | 0.409368 | -5.96266 | H                  | 1.473106 | 0.190965 | 0.043651 |
| O  | 0.409434 | -2.40026 | -5.96258 | H                  | 0.191871 | 1.472552 | 0.04383  |
| O  | -2.74433 | 2.773911 | -4.81104 | C                  | -0.48017 | -0.48063 | 0.709504 |
| O  | 0.78782  | -0.8238  | -9.85314 | H                  | -1.54935 | -0.28448 | 0.480871 |
| O  | 2.773577 | -2.74255 | -7.08874 | H                  | -0.28445 | -1.54984 | 0.48058  |
| O  | -3.16524 | 0.400791 | -3.42817 | C                  | -0.16628 | -0.16723 | 2.148334 |
| O  | 0.387609 | -3.15174 | -8.49138 | H                  | 0.915609 | -0.34407 | 2.331055 |
| O  | -0.734   | -0.7341  | -7.42593 | H                  | -0.34204 | 0.914837 | 2.331124 |
| O  | -0.72961 | -0.72977 | -4.52108 | C                  | -0.96314 | -0.96329 | 3.177519 |
| O  | 1.791279 | -0.30536 | -5.96574 | H                  | -2.04779 | -0.75961 | 3.093098 |
| O  | -0.30528 | 1.791094 | -5.96561 | H                  | -0.76003 | -2.04809 | 3.093462 |
| O  | -3.48057 | -1.55528 | -4.55137 |                    |          |          |          |
| O  | -1.55631 | -3.48478 | -7.3491  |                    |          |          |          |
| O  | -2.74284 | 2.773213 | -7.08872 | <b>Zr_adipic_3</b> |          |          |          |
| O  | -2.72681 | 2.79188  | 7.582455 | C                  | -3.80131 | -0.6522  | 10.94689 |
| O  | -2.74717 | 2.768381 | 9.859141 | C                  | 3.801313 | 0.652202 | 6.493378 |
| O  | 2.774042 | -2.74432 | -4.811   | C                  | -3.80131 | -0.6522  | -8.17661 |
| O  | -0.82363 | 0.788179 | -9.85331 | C                  | 3.801313 | 0.652202 | -3.7231  |
| O  | 0.99314  | 0.993008 | 10.71092 | C                  | 0.652202 | 3.801313 | -8.17661 |
| O  | 0.981215 | 0.980948 | 6.737277 | C                  | -0.6522  | -3.80131 | -3.7231  |
| O  | 0.412348 | -2.39371 | 8.737453 | C                  | 0.652202 | 3.801313 | 10.94689 |
| O  | -2.39383 | 0.412321 | 8.737401 | C                  | -0.6522  | -3.80131 | 6.493378 |
| O  | 2.792028 | -2.7268  | 7.582414 | C                  | 0.652202 | 3.801313 | -3.7231  |
| O  | -0.82242 | 0.789333 | 12.62356 | C                  | 3.801313 | 0.652202 | -8.17661 |
| O  | 3.503848 | 1.534364 | 10.08896 | C                  | -3.80131 | -0.6522  | -3.7231  |
| O  | 1.524252 | 3.512979 | 7.364092 | C                  | -0.6522  | -3.80131 | -8.17661 |
| O  | -0.73208 | -0.7322  | 10.19616 | C                  | -3.14911 | 3.149111 | -5.94986 |
| O  | -0.73723 | -0.73746 | 7.282215 | C                  | -3.14911 | 3.149111 | 8.720136 |
|    |          |          |          | C                  | -1.1E-08 | 4.91E-08 | -10.4034 |

|    |          |          |          |                         |          |          |          |
|----|----------|----------|----------|-------------------------|----------|----------|----------|
| C  | 3.149111 | -3.14911 | -5.94986 | O                       | -3.15831 | 0.391926 | 6.17928  |
| C  | 3.149111 | -3.14911 | 8.720136 | O                       | 0.391631 | -3.15203 | 11.25031 |
| C  | 0.652202 | 3.801313 | 6.493378 | O                       | 3.175737 | -0.41389 | 11.22283 |
| C  | -3.2E-08 | 2.05E-08 | 13.17365 | O                       | 0.789066 | -0.82042 | 12.61781 |
| C  | -3.80131 | -0.6522  | 6.493378 | H                       | 3.910628 | -3.97111 | -5.95149 |
| C  | -0.6522  | -3.80131 | 10.94689 | H                       | -0.8001  | -4.77307 | -8.71452 |
| C  | 3.801313 | 0.652202 | 10.94689 | H                       | -0.82201 | -4.76377 | -3.17372 |
| Zr | -1.76999 | -1.76979 | 8.719688 | H                       | -4.76993 | -0.81212 | -3.18161 |
| Zr | -1.24923 | 1.250524 | 10.4809  | H                       | 4.749812 | 0.829884 | -3.15347 |
| Zr | 1.761604 | 1.761986 | 8.715228 | H                       | 0.825026 | 4.753528 | -3.15835 |
| Zr | 1.237032 | -1.24982 | 6.916199 | H                       | -3.96898 | 3.912825 | -5.94921 |
| Zr | -1.24762 | 1.251336 | -7.70801 | H                       | 0.837227 | 4.737696 | -8.76349 |
| Zr | -1.76937 | -1.77001 | -5.94751 | H                       | 4.738564 | 0.836691 | -8.76231 |
| Zr | 1.250498 | -1.25207 | -4.16371 | H                       | 0.021751 | 0.022511 | -11.5234 |
| Zr | 1.76768  | 1.767341 | -5.93712 | H                       | -4.77179 | -0.8007  | -8.71658 |
| Zr | -1.24598 | 1.242988 | -4.15336 | H                       | 0.83658  | 4.739903 | 11.53051 |
| Zr | 1.251298 | -1.2474  | -7.71156 | H                       | -3.96258 | 3.919768 | 8.721407 |
| Zr | -1.25632 | 1.24496  | 6.927102 | H                       | -4.77309 | -0.8002  | 11.48481 |
| Zr | 1.251025 | -1.24965 | 10.47695 | H                       | 0.02408  | 0.02313  | 14.29367 |
| O  | 3.15217  | 0.391064 | 11.25254 | H                       | 0.832894 | 4.749079 | 5.922932 |
| O  | -3.48506 | -1.55432 | 10.11615 | H                       | 4.754937 | 0.825808 | 5.930594 |
| O  | 3.166878 | -0.40242 | 6.192038 | H                       | -4.77767 | -0.8013  | 5.963753 |
| O  | 3.498841 | 1.530935 | 7.351958 | H                       | -0.79529 | -4.78069 | 5.967848 |
| O  | -3.48685 | -1.55263 | -7.34294 | H                       | -0.80085 | -4.77162 | 11.48719 |
| O  | -3.15037 | 0.390116 | -8.48186 | H                       | 3.91886  | -3.96337 | 8.718524 |
| O  | 3.505963 | 1.52471  | -4.59012 | H                       | 4.73779  | 0.837784 | 11.53347 |
| O  | 3.164835 | -0.40127 | -3.4199  | H                       | -3.34375 | 0.576708 | -5.93609 |
| O  | -0.41497 | 3.176553 | -8.45063 | H                       | 1.386855 | 1.39147  | -8.71563 |
| O  | 1.53075  | 3.50387  | -7.31428 | H                       | 0.575853 | -3.34545 | -5.93965 |
| O  | 0.416417 | -3.18811 | -3.44255 | H                       | 1.31882  | 1.314463 | -3.0801  |
| O  | -1.55997 | -3.46979 | -4.54183 | H                       | -3.35185 | 0.572556 | 8.716742 |
| O  | 1.52871  | 3.504118 | 10.08233 | H                       | 1.407634 | 1.413967 | 5.949658 |
| O  | -0.412   | 3.174291 | 11.22656 | H                       | 0.573479 | -3.34956 | 8.711224 |
| O  | -1.55333 | -3.48198 | 7.321831 | H                       | 1.387976 | 1.38489  | 11.48844 |
| O  | 0.386419 | -3.15114 | 6.172273 | C                       | -0.3464  | -0.38576 | -1.52177 |
| O  | 1.523296 | 3.507158 | -4.59128 | O                       | 0.677468 | -0.94787 | -2.03798 |
| O  | 0.99015  | 0.991422 | -7.92328 | O                       | -0.91583 | 0.648547 | -2.00786 |
| O  | -0.39627 | 3.158519 | -3.41265 | C                       | -0.96388 | -1.02862 | -0.28642 |
| O  | 3.503866 | 1.530677 | -7.31428 | H                       | -0.49558 | -2.02272 | -0.14796 |
| O  | 0.979904 | 0.976124 | -3.92731 | H                       | -2.03175 | -1.18431 | -0.54858 |
| O  | 3.176081 | -0.41424 | -8.45241 | C                       | -0.886   | -0.20887 | 1.013638 |
| O  | -2.38612 | 0.408912 | -5.93999 | H                       | -1.20774 | 0.833707 | 0.801516 |
| O  | 0.409981 | -2.3875  | -5.94548 | H                       | -1.6271  | -0.61529 | 1.734535 |
| O  | -2.73167 | 2.780084 | -4.81196 | O                       | 0.750245 | -0.81173 | 4.755991 |
| O  | 0.790658 | -0.81979 | -9.84888 | C                       | 0.118048 | 0.16138  | 4.224966 |
| O  | 2.768637 | -2.744   | -7.08789 | O                       | -0.83447 | 0.7951   | 4.79214  |
| O  | -3.17389 | 0.405321 | -3.42665 | C                       | 0.620182 | 0.699337 | 2.887943 |
| O  | 0.388463 | -3.14948 | -8.48523 | H                       | 0.111799 | 1.66519  | 2.699101 |
| O  | -0.73372 | -0.73372 | -7.41331 | H                       | 1.696615 | 0.912368 | 3.06725  |
| O  | -0.74101 | -0.74438 | -4.46194 | C                       | 0.507747 | -0.20995 | 1.651976 |
| O  | 1.778146 | -0.30329 | -5.93523 | H                       | 0.811418 | -1.24379 | 1.923552 |
| O  | -0.30395 | 1.774668 | -5.92939 | H                       | 1.251321 | 0.134303 | 0.901399 |
| O  | -3.47615 | -1.55659 | -4.54655 |                         |          |          |          |
| O  | -1.55207 | -3.48724 | -7.34215 |                         |          |          |          |
| O  | -2.74535 | 2.769031 | -7.08858 |                         |          |          |          |
| O  | -2.74601 | 2.770307 | 7.58063  |                         |          |          |          |
| O  | -2.7409  | 2.772585 | 9.858161 |                         |          |          |          |
| O  | 2.784697 | -2.73229 | -4.81111 |                         |          |          |          |
| O  | -0.81953 | 0.790075 | -9.84765 |                         |          |          |          |
| O  | 0.989698 | 0.987953 | 10.69534 |                         |          |          |          |
| O  | 0.982589 | 0.986427 | 6.712215 |                         |          |          |          |
| O  | 0.407773 | -2.39153 | 8.707939 |                         |          |          |          |
| O  | -2.39366 | 0.40805  | 8.713206 |                         |          |          |          |
| O  | 2.769999 | -2.7406  | 7.581733 |                         |          |          |          |
| O  | -0.82078 | 0.790035 | 12.61949 |                         |          |          |          |
| O  | 3.504397 | 1.529065 | 10.08261 |                         |          |          |          |
| O  | 1.536377 | 3.494225 | 7.346277 |                         |          |          |          |
| O  | -0.73543 | -0.73573 | 10.18556 |                         |          |          |          |
| O  | -0.73352 | -0.73104 | 7.251735 |                         |          |          |          |
| O  | -0.30956 | 1.778819 | 8.706641 |                         |          |          |          |
| O  | 1.775583 | -0.3102  | 8.700144 |                         |          |          |          |
| O  | -1.55398 | -3.48617 | 10.11527 |                         |          |          |          |
| O  | -3.47909 | -1.55415 | 7.320682 |                         |          |          |          |
| O  | 2.772395 | -2.74363 | 9.859165 |                         |          |          |          |
| O  | -0.41277 | 3.179434 | 6.208871 |                         |          |          |          |
|    |          |          |          | <b>Zr_terephthalate</b> |          |          |          |
|    |          |          |          | Zr                      | 1.756731 | 2.22E-08 | 10.47687 |
|    |          |          |          | Zr                      | -1.9E-08 | -2.48439 | 8.720136 |
|    |          |          |          | Zr                      | -1.75673 | 2.38E-08 | 6.963405 |
|    |          |          |          | Zr                      | -2.9E-09 | 2.484393 | 8.720136 |
|    |          |          |          | Zr                      | -8.9E-09 | 2.484393 | -5.94985 |
|    |          |          |          | Zr                      | -1.8E-08 | -2.48439 | -5.94985 |
|    |          |          |          | Zr                      | 1.756731 | -1.2E-08 | -4.19312 |
|    |          |          |          | Zr                      | -1.75673 | -1.8E-08 | -7.70659 |
|    |          |          |          | Zr                      | -1.75673 | 7.95E-09 | 10.47687 |
|    |          |          |          | Zr                      | 1.756731 | 3.18E-08 | 6.963405 |
|    |          |          |          | Zr                      | 1.756731 | -1.1E-08 | -7.70659 |
|    |          |          |          | Zr                      | -1.75673 | -1.7E-08 | -4.19312 |
|    |          |          |          | O                       | 1.340818 | -3.56543 | 10.15049 |
|    |          |          |          | C                       | 2.145907 | -3.157   | 11.04055 |
|    |          |          |          | O                       | 2.476803 | -1.95844 | 11.2883  |
|    |          |          |          | O                       | -1.4315  | 3.567485 | 7.381307 |
|    |          |          |          | C                       | -2.3211  | 3.159852 | 6.5756   |
|    |          |          |          | O                       | -2.5705  | 1.96127  | 6.245314 |
|    |          |          |          | O                       | -2.5718  | 1.961066 | -3.47513 |
|    |          |          |          | C                       | -2.32448 | 3.159326 | -3.80821 |
|    |          |          |          | O                       | -1.43637 | 3.56668  | -4.61563 |

|   |          |          |          |   |          |          |          |
|---|----------|----------|----------|---|----------|----------|----------|
| O | 2.476004 | -1.95855 | -8.51956 | C | -2.32076 | 3.156081 | -8.09612 |
| C | 2.143332 | -3.15675 | -8.2728  | C | -2.14608 | -3.15714 | -8.26965 |
| O | 1.336038 | -3.56447 | -7.38435 | O | 2.572175 | 1.961731 | 6.246872 |
| O | 1.434774 | 3.563866 | -7.28715 | C | 2.32386  | 3.159966 | 6.578945 |
| C | 2.323163 | 3.155744 | -8.09413 | O | 1.434923 | 3.566977 | 7.385751 |
| O | 2.569716 | 1.957353 | -8.42675 | O | 2.473726 | -1.96021 | 6.145003 |
| O | 2.569662 | 1.957987 | 11.19547 | C | 2.140985 | -3.15821 | 6.394019 |
| C | 2.320543 | 3.156619 | 10.86594 | O | 1.335526 | -3.56462 | 7.284329 |
| O | 1.430194 | 3.565024 | 10.06116 | O | 1.989999 | -1.40592 | 8.718762 |
| O | -1.33618 | -3.56397 | -4.51525 | O | 0.000357 | 1.410121 | 6.739046 |
| C | -2.14307 | -3.15827 | -3.62581 | O | -1.98939 | -1.40624 | 8.721728 |
| O | -2.47708 | -1.96055 | -3.37743 | O | -0.00087 | 1.404786 | 10.70981 |
| O | -2.47753 | -1.96038 | 6.14869  | O | -3.90738 | 0.067634 | 7.582534 |
| C | -2.14479 | -3.15842 | 6.397594 | O | 1.136833 | -0.06833 | 12.62637 |
| O | -1.33957 | -3.56505 | 7.288023 | O | 0.000621 | -1.04221 | 10.19289 |
| O | 3.907139 | 0.068351 | -7.08452 | O | -1.47149 | 1.041053 | 8.722276 |
| O | 0.000844 | 1.404414 | -7.93976 | O | 1.470989 | 1.041111 | 8.722259 |
| C | 4.465879 | 0.126034 | -5.94814 | O | -0.00029 | -1.0391  | 7.256049 |
| O | 3.907759 | 0.066952 | -4.81113 | O | -1.43546 | 3.563876 | 10.05659 |
| O | 1.13619  | -0.07012 | -9.8565  | O | -1.33615 | -3.56552 | 10.15406 |
| O | 1.989903 | -1.40551 | -5.95083 | C | -2.32475 | 3.155618 | 10.86251 |
| C | -0.00042 | -0.12798 | -10.4149 | O | -2.57206 | 1.957123 | 11.19405 |
| O | -1.13684 | -0.06943 | -9.8559  | O | -1.1363  | -0.06614 | 12.62729 |
| O | 2.476418 | -1.96103 | -3.37734 | O | -3.90731 | 0.066223 | 9.855892 |
| O | -0.0007  | 1.410103 | -3.96756 | O | -2.47366 | -1.959   | 11.29097 |
| C | 2.144081 | -3.15883 | -3.62732 | C | -2.14221 | -3.15739 | 11.04347 |
| O | 1.339611 | -3.56497 | -4.51882 | C | -4.46577 | 0.125364 | 8.719448 |
| O | -1.9893  | -1.40541 | -5.94947 | C | 0.000384 | -0.12553 | 13.18548 |
| O | 2.570521 | 1.961631 | -3.47432 | H | 2.786191 | -1.96494 | 8.721795 |
| O | -2.56911 | 1.957321 | -8.42617 | H | -0.00155 | 1.96252  | 11.50694 |
| O | -2.47625 | -1.95855 | -8.51808 | H | -2.78592 | -1.96478 | 8.724709 |
| O | 1.13217  | -0.06335 | -2.08204 | H | 0.001942 | 1.965842 | 5.940533 |
| O | -3.90636 | 0.068122 | -7.08455 | H | -1.96365 | -5.95365 | -5.95365 |
| O | -1.47055 | 1.041629 | -5.95158 | H | -0.00098 | 1.965996 | -3.16918 |
| O | 0.000572 | -1.03866 | -4.48529 | H | 0.001445 | 1.962066 | -8.73694 |
| O | 0.000294 | -1.04055 | -7.42072 | H | -2.78597 | -1.96375 | -5.95146 |
| O | 1.473107 | 1.042837 | -5.9512  | H | 2.95216  | 3.945289 | 11.34894 |
| O | -1.13309 | -0.06279 | -2.08209 | H | 2.954794 | 3.949536 | 6.096393 |
| C | -0.00046 | -0.16185 | -0.00901 | H | -2.95169 | 3.949082 | 6.092034 |
| C | 1.224089 | -0.17294 | 0.687743 | H | -2.95735 | 3.944125 | 11.34449 |
| H | 2.161018 | -0.16937 | 0.113079 | H | 5.580994 | 0.228509 | 8.717763 |
| C | -0.00042 | -0.10138 | -1.49739 | H | 2.627945 | -3.94551 | 11.67309 |
| C | -1.22488 | -0.17432 | 0.687922 | H | 0.000831 | -0.23001 | 14.30051 |
| H | -2.16191 | -0.17175 | 0.113415 | H | 2.621299 | -3.94809 | 5.76179  |
| O | -1.13239 | -0.06239 | 4.852993 | H | -2.62518 | -3.9482  | 5.765287 |
| C | -0.00025 | -0.16091 | 2.779526 | H | -2.6243  | -3.94617 | 11.67564 |
| C | 1.224201 | -0.17228 | 2.082586 | H | -5.5808  | 0.230288 | 8.71955  |
| H | 2.161226 | -0.16871 | 2.657088 | H | 2.623886 | -3.94914 | -2.99524 |
| C | 5.78E-05 | -0.09946 | 4.267762 | H | 5.580918 | 0.230836 | -5.94838 |
| O | 1.13276  | -0.05855 | 4.852147 | H | 2.953204 | 3.949295 | -3.32356 |
| C | -1.22479 | -0.17392 | 2.082798 | H | 2.95555  | 3.944327 | -8.57627 |
| H | -2.16175 | -0.17134 | 2.657426 | H | 2.625418 | -3.94573 | -8.90472 |
| O | -3.90771 | 0.066754 | -4.81135 | H | -0.00084 | -0.23246 | -11.5299 |
| C | -4.46574 | 0.124831 | -5.94841 | H | -2.9525  | 3.944457 | -8.57942 |
| C | 2.32158  | 3.159994 | -3.80571 | H | -2.95594 | 3.948583 | -3.3258  |
| O | 1.431545 | 3.567629 | -4.61097 | H | -5.58093 | 0.227643 | -5.94906 |
| O | 3.906809 | 0.069139 | 9.853765 | H | -2.62347 | -3.94862 | -2.99425 |
| C | 4.465839 | 0.125036 | 8.717521 | H | -2.62932 | -3.94593 | -8.90089 |
| O | 3.907823 | 0.065558 | 7.580414 |   |          |          |          |
| O | -1.3403  | -3.56516 | -7.37999 |   |          |          |          |
| O | -1.43121 | 3.56461  | -7.29069 |   |          |          |          |

## 9. Infrared spectra

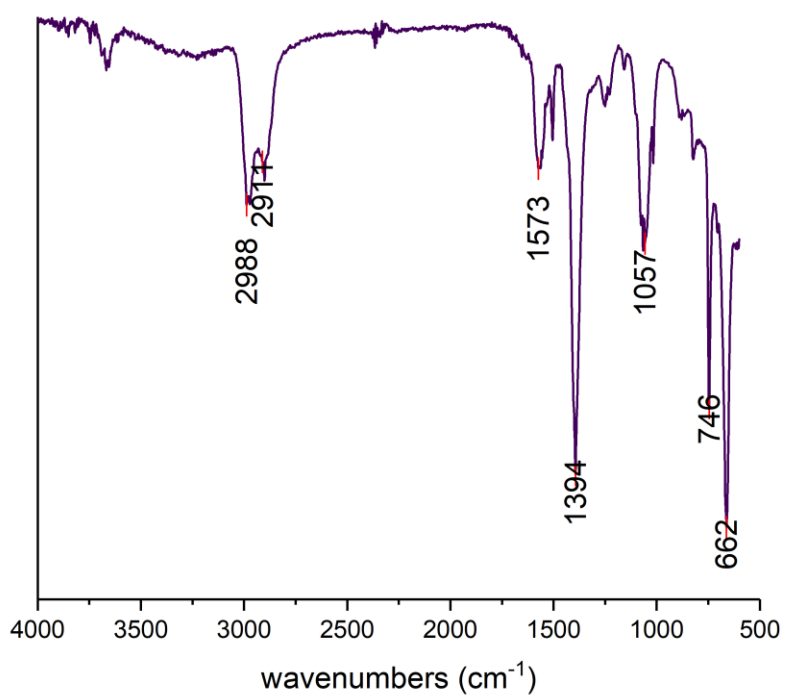

Figure S74: Infrared spectrum of UiO-66-0

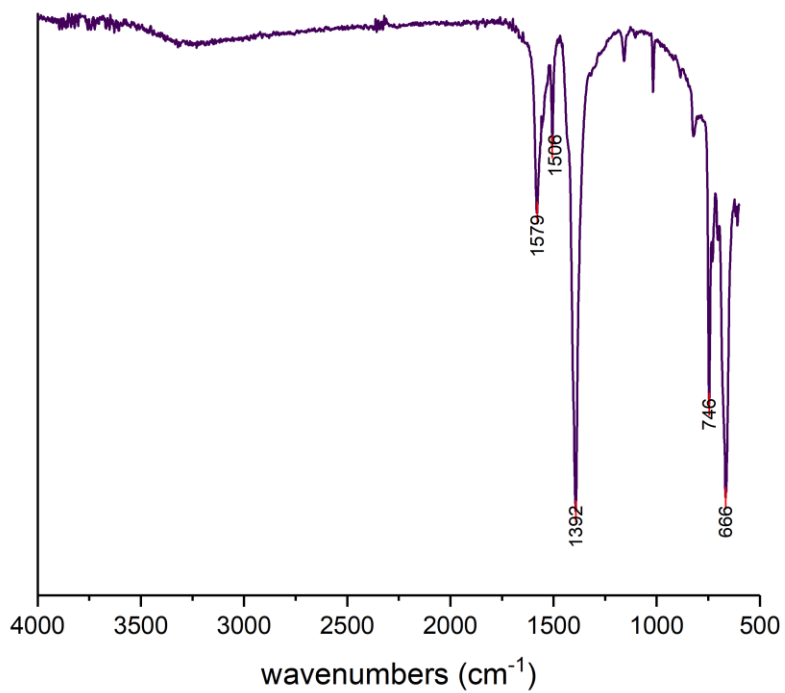

Figure S75: Infrared spectrum of UiO-66-5

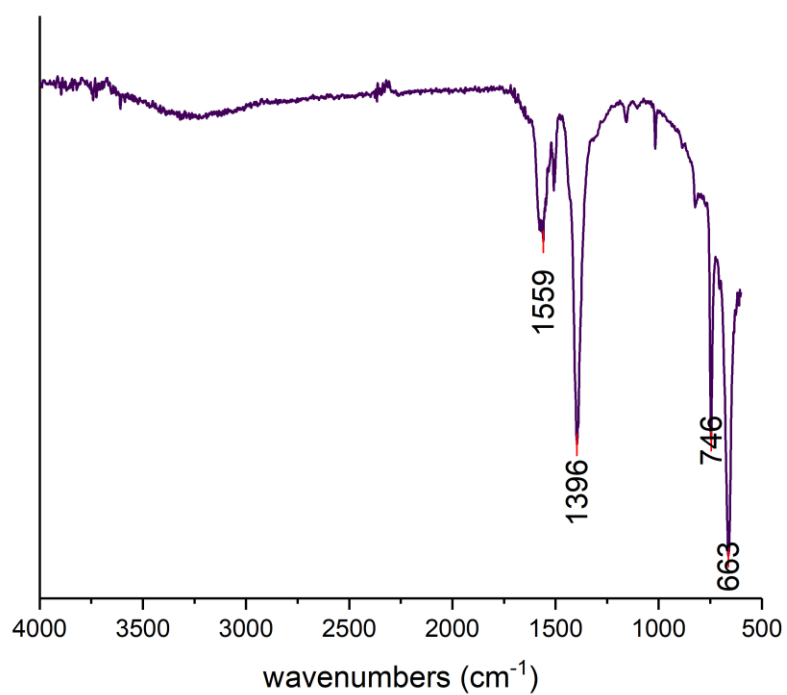

Figure S76: Infrared spectrum of UiO-66-14

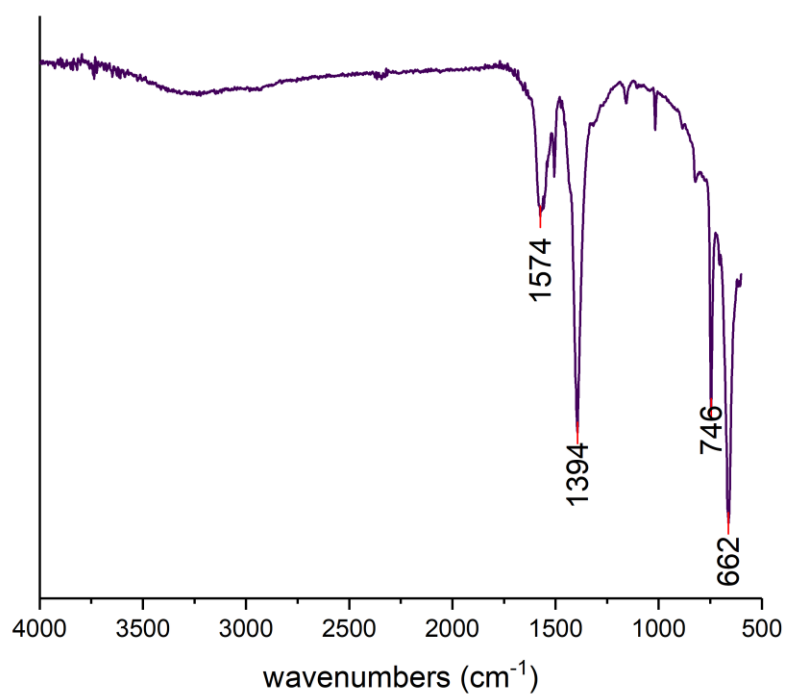

Figure S77: Infrared spectrum of UiO-66-19



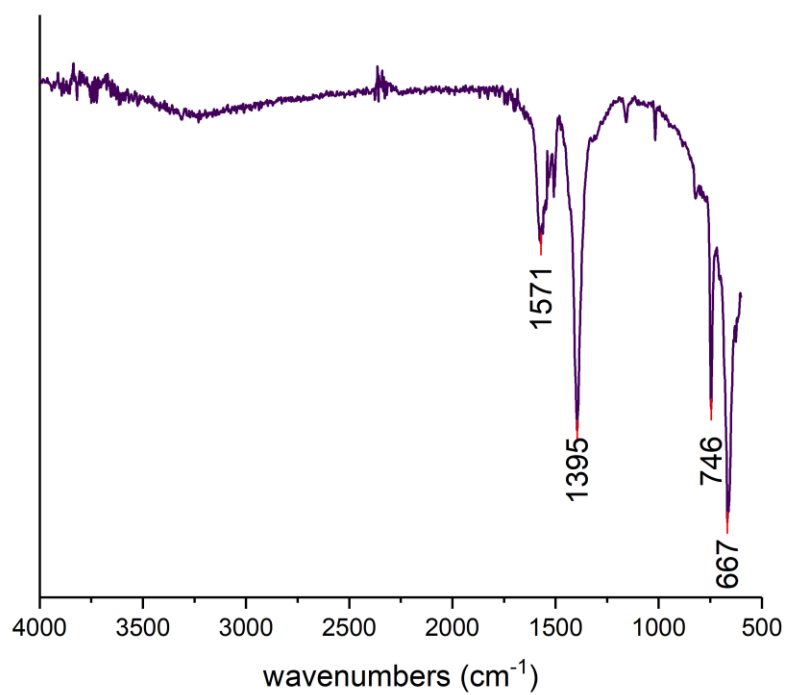

Figure S78: Infrared spectrum of UiO-66-28

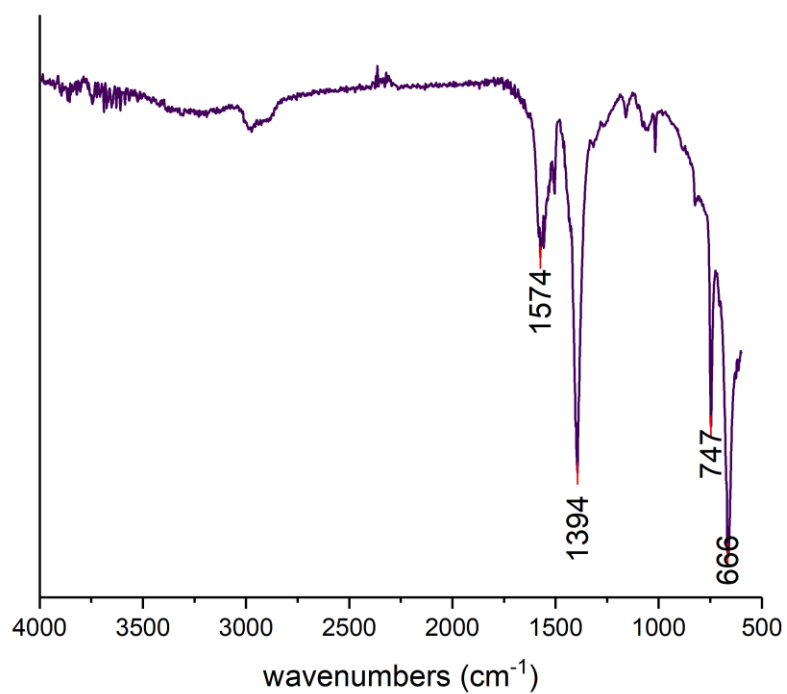

Figure S79: Infrared spectrum of UiO-66-35

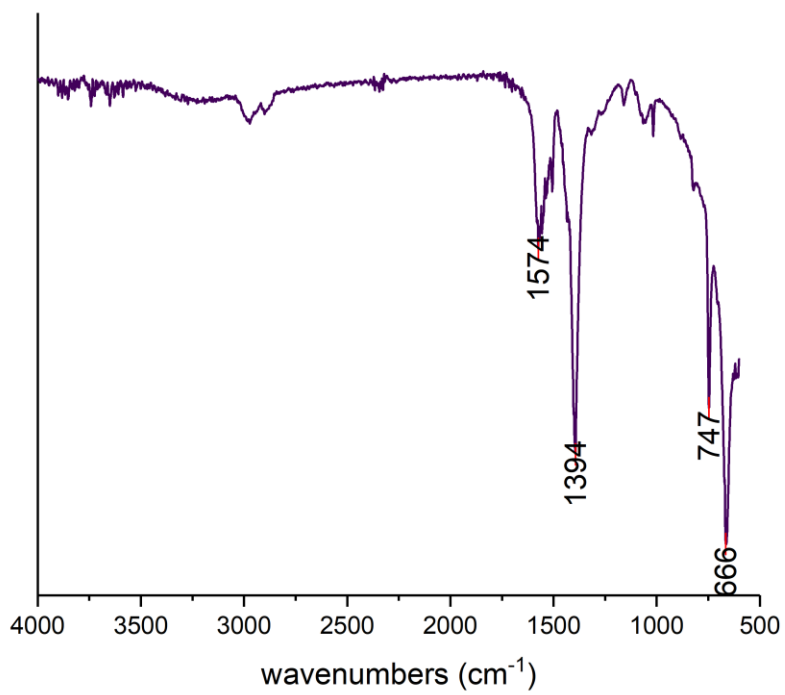

Figure S80: Infrared spectrum of UiO-66-40

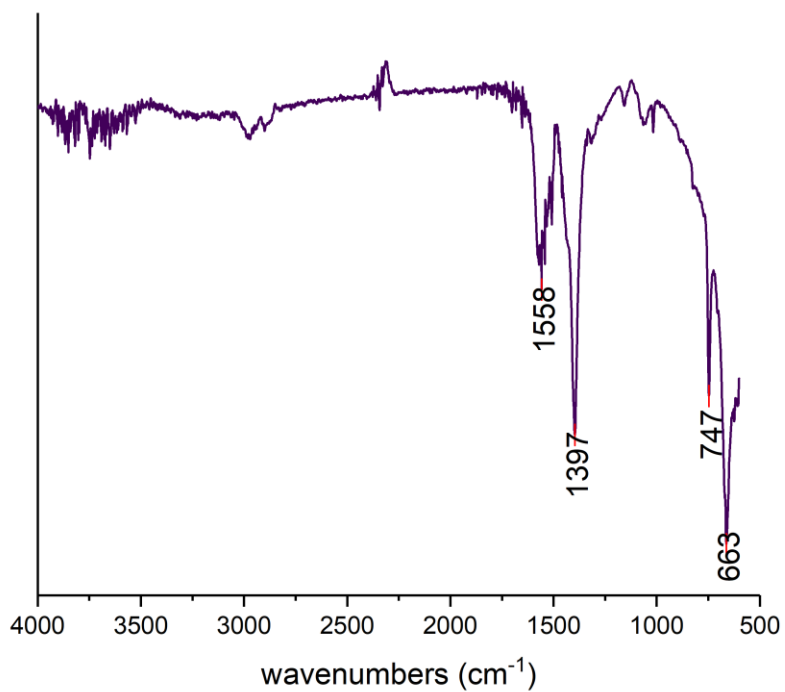

Figure S81: Infrared spectrum of UiO-66-51

## 10. References

- 1 H. Reinsch, I. Stassen, B. Bueken, A. Lieb, R. Ameloot and D. de Vos, *CrystEngComm*, 2015, **17**, 331–337.
- 2 G. C. Shearer, S. Chavan, S. Bordiga, S. Svelle, U. Olsbye and K. P. Lillerud, *Chem. Mater.*, 2016, **28**, 3749–3761.
- 3 S. Øien, D. Wragg, H. Reinsch, S. Svelle, S. Bordiga, C. Lamberti and K. P. Lillerud, *Cryst. Growth Des*, 2014, **14**, 5370–5372.
- 4 C. Bannwarth, S. Ehlert and S. Grimme, *J. Chem. Theory Comput.*, 2019, **15**, 1652–1671.
- 5 Perdew, Burke and Ernzerhof, *Phys. Rev. Lett.*, 1996, **77**, 3865–3868.
- 6 E. Caldeweyher, C. Bannwarth and S. Grimme, *J. Chem. Phys.*, 2017, **147**, 34112.
- 7 F. Weigend and R. Ahlrichs, *Phys. Chem. Chem. Phys*, 2005, **7**, 3297–3305.
- 8 D. Andrae, U. Huermann, M. Dolg, H. Stoll and H. Preu, *Theoret. Chim. Acta*, 1990, **77**, 123–141.
- 9 F. Weigend, *Phys. Chem. Chem. Phys*, 2006, **8**, 1057–1065.
- 10 C. Adamo and V. Barone, *J. Chem. Phys.*, 1999, **110**, 6158–6170.
